# Supplementary material for: Synthesis and biological evaluation of cyclic derivatives of combretastatin A-4 containing group 14 elements
Source: Royal Society of Chemistry journal article supplement (doi:10.1039/c8ob01148f), 2018-01-01
Supplement: c8ob01148f1.pdf [file c8ob01148f1.pdf]

# Synthesis and biological evaluation of cyclic derivatives of combretastatin A-4 containing group 14 elements

Víctor Blasco,<sup>†</sup> Juan Murga,<sup>†</sup> Eva Falomir,<sup>†</sup> Miguel Carda,<sup>†</sup> Santiago Royo,<sup>†</sup> Ana C. Cuñat,<sup>‡</sup> Juan F. Sanz-Cervera<sup>‡</sup> and J. Alberto Marco<sup>‡</sup>

<sup>†</sup>*Depart. de Q. Inorgánica y Orgánica, Univ. Jaume I, E-12080 Castellón, Spain; and* <sup>‡</sup>*Depart. de Q. Orgánica, Univ. de Valencia, E-46100 Burjassot, Valencia, Spain*

## ***Supporting Information***

### **Contents:**

**S-2/S-93: Graphical NMR spectra of new compounds**

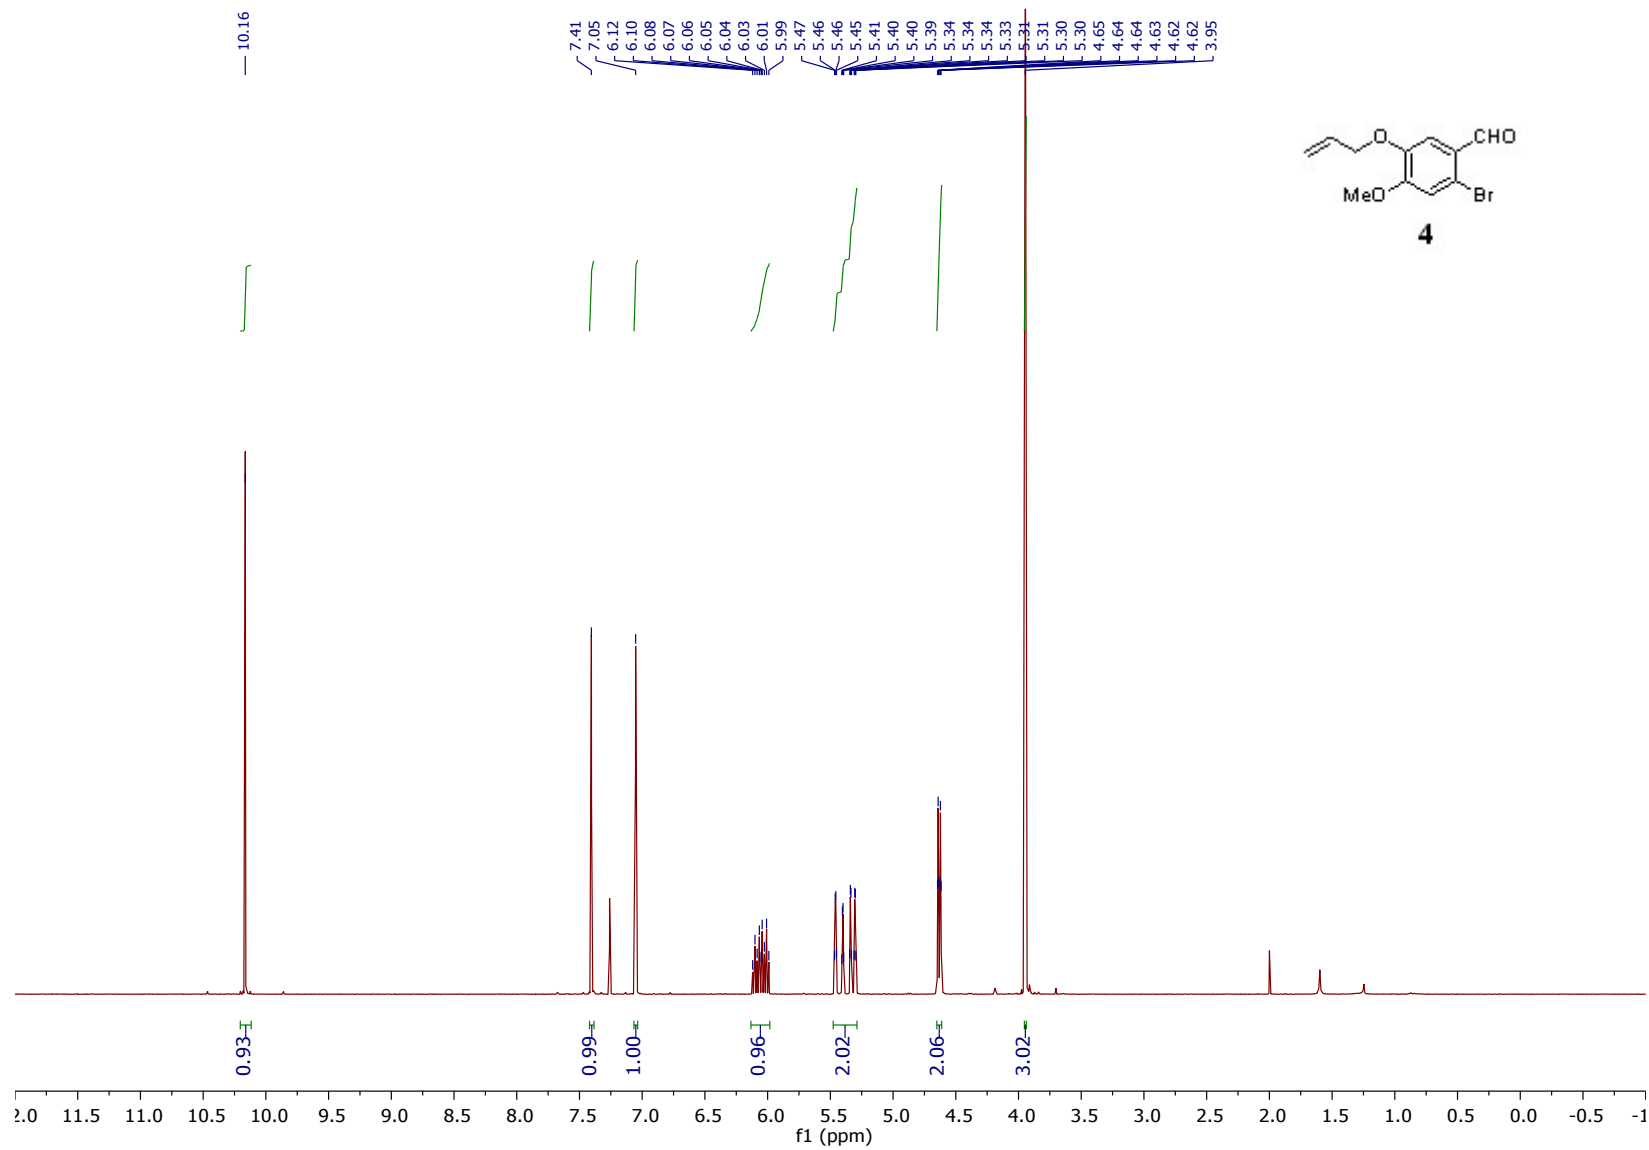

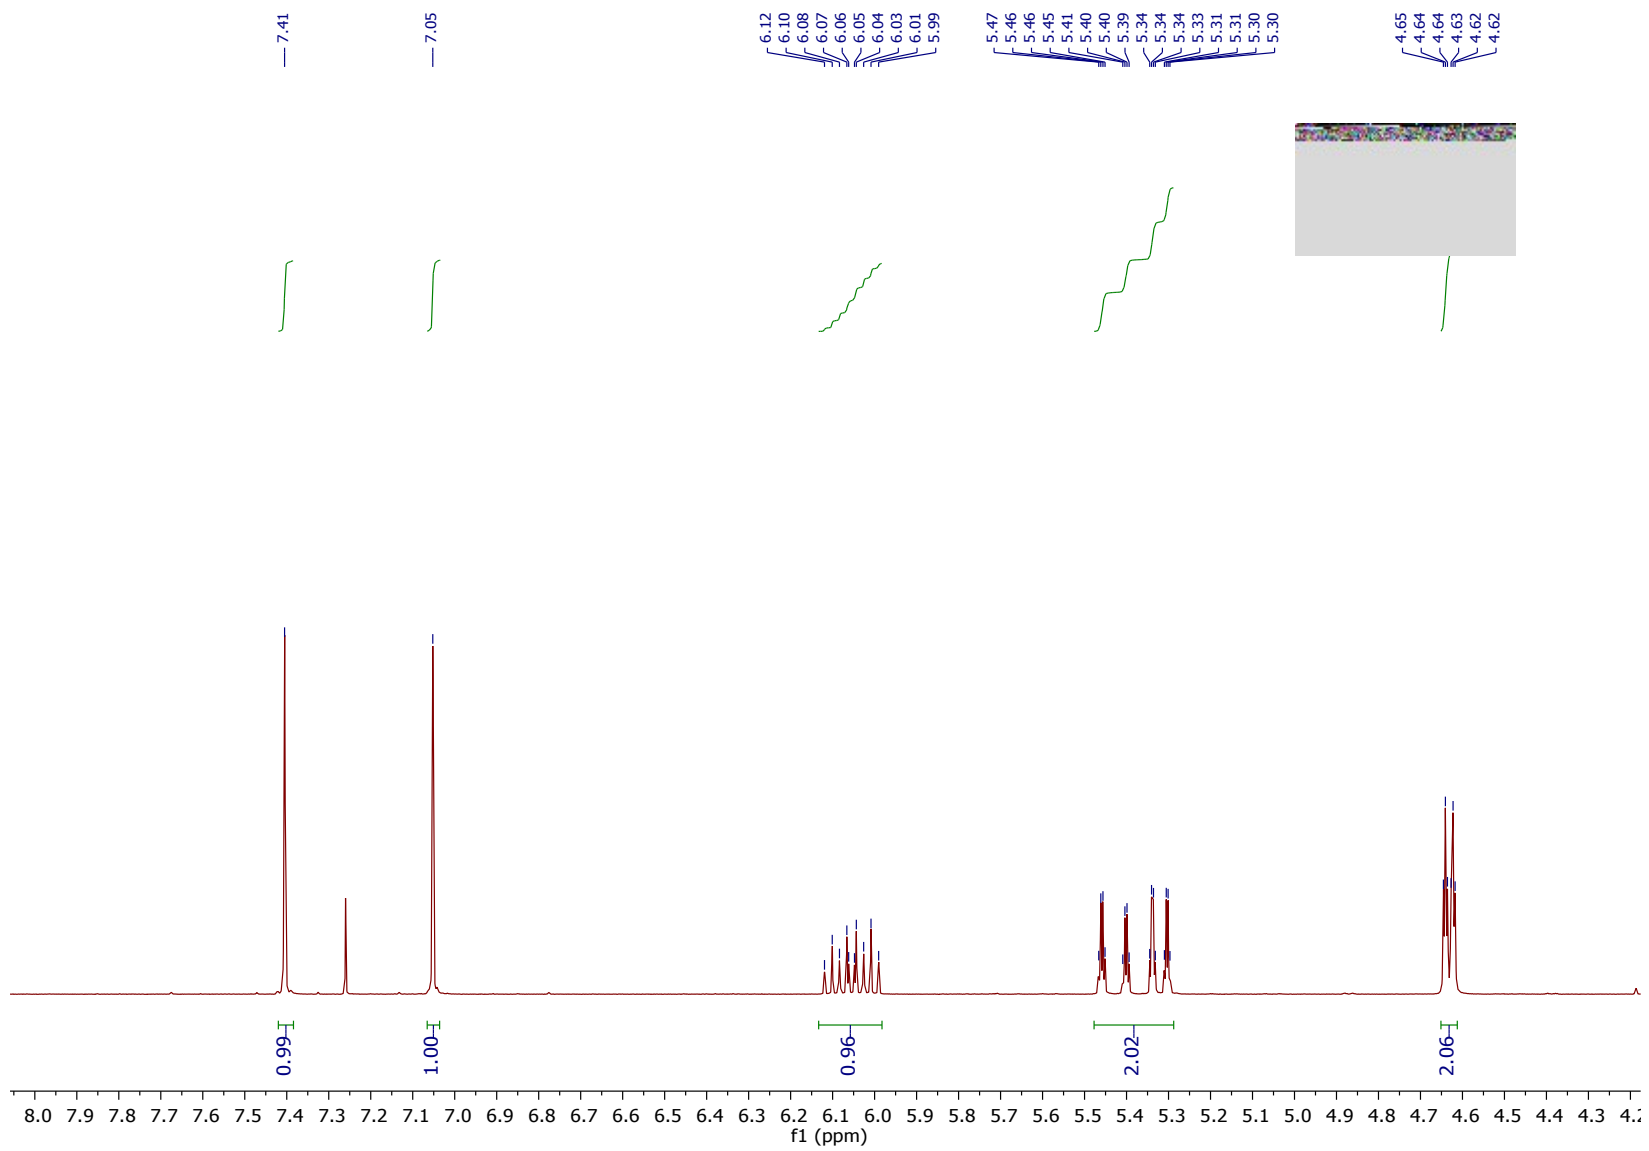

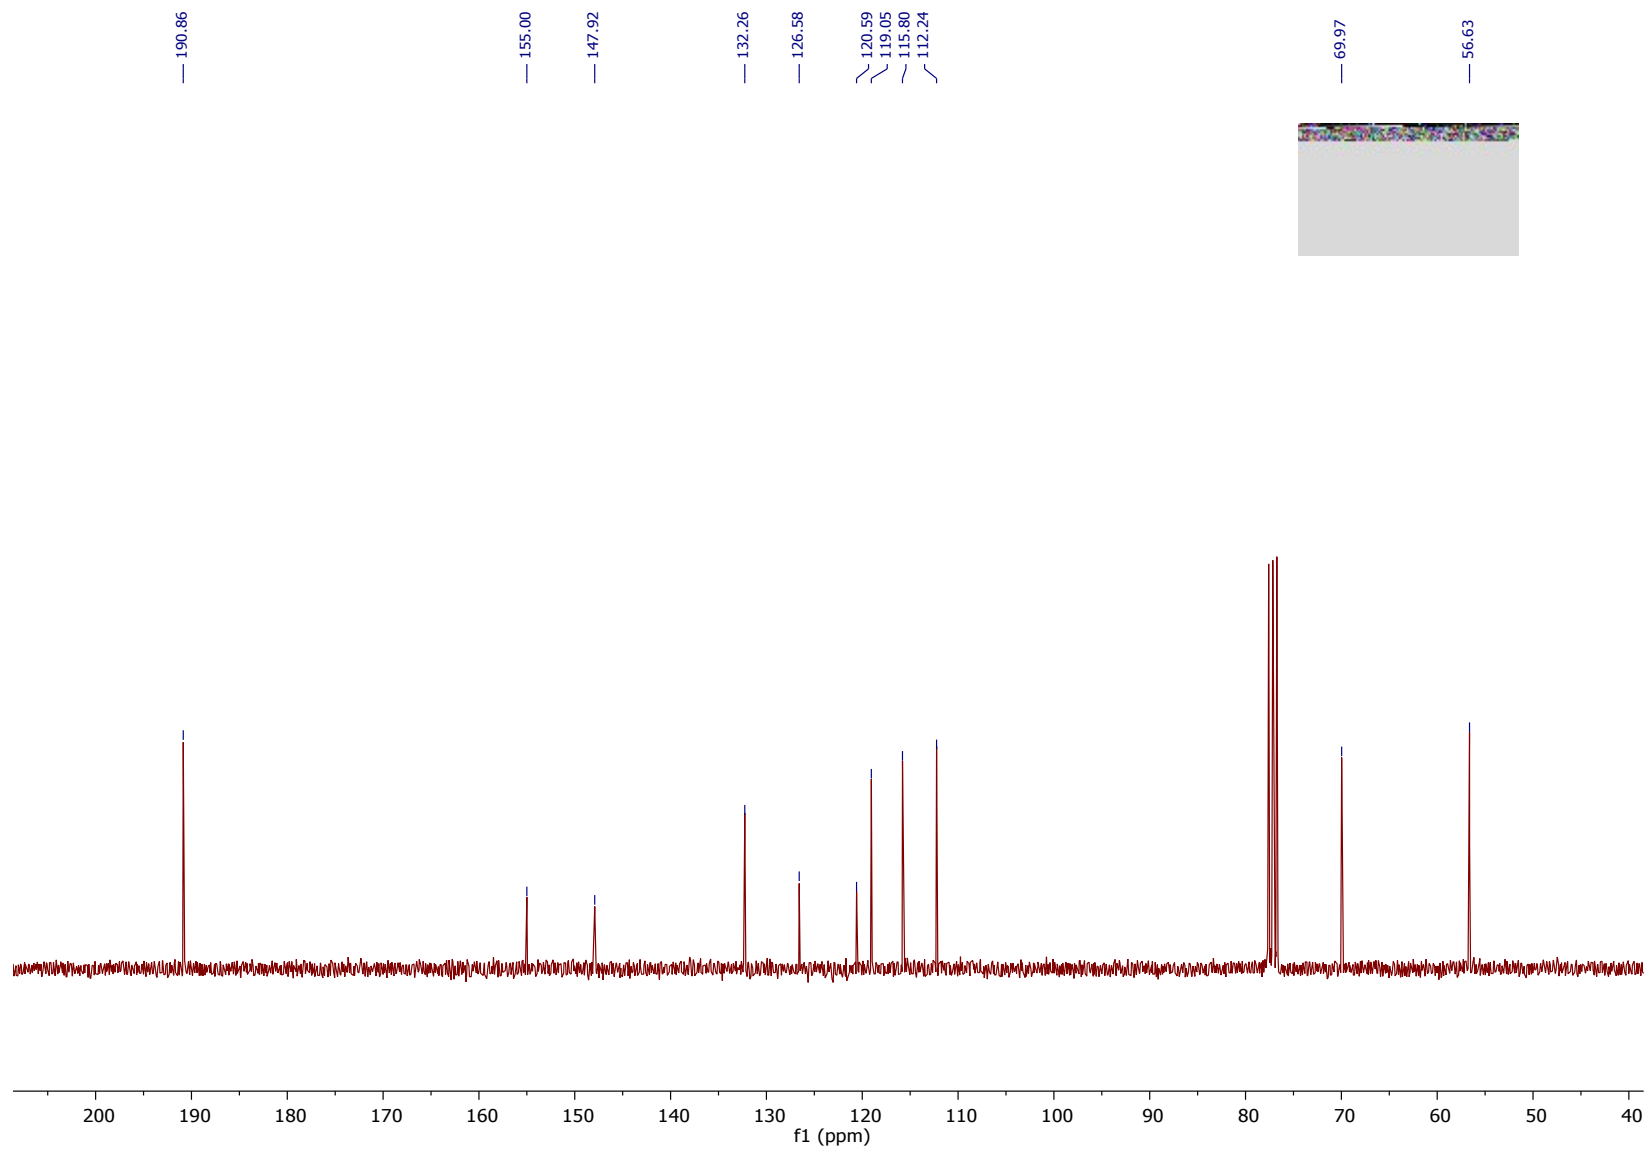

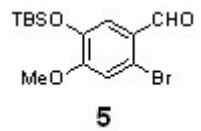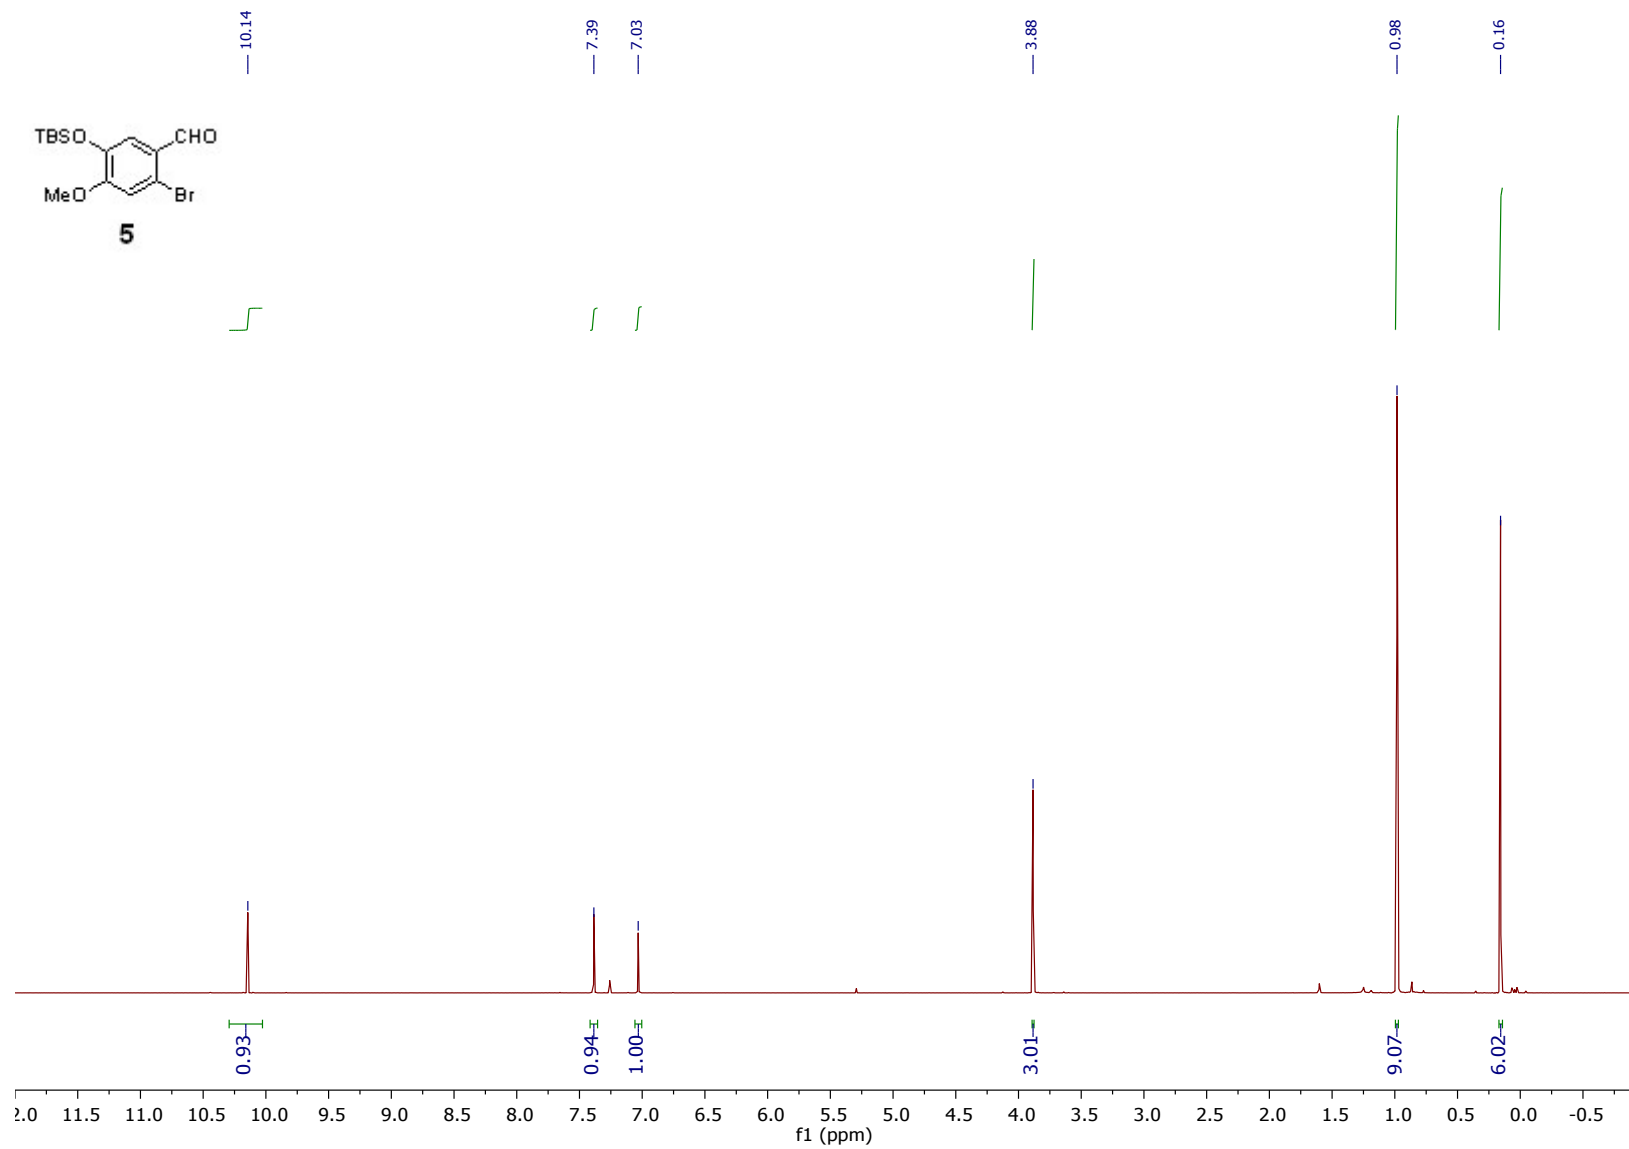

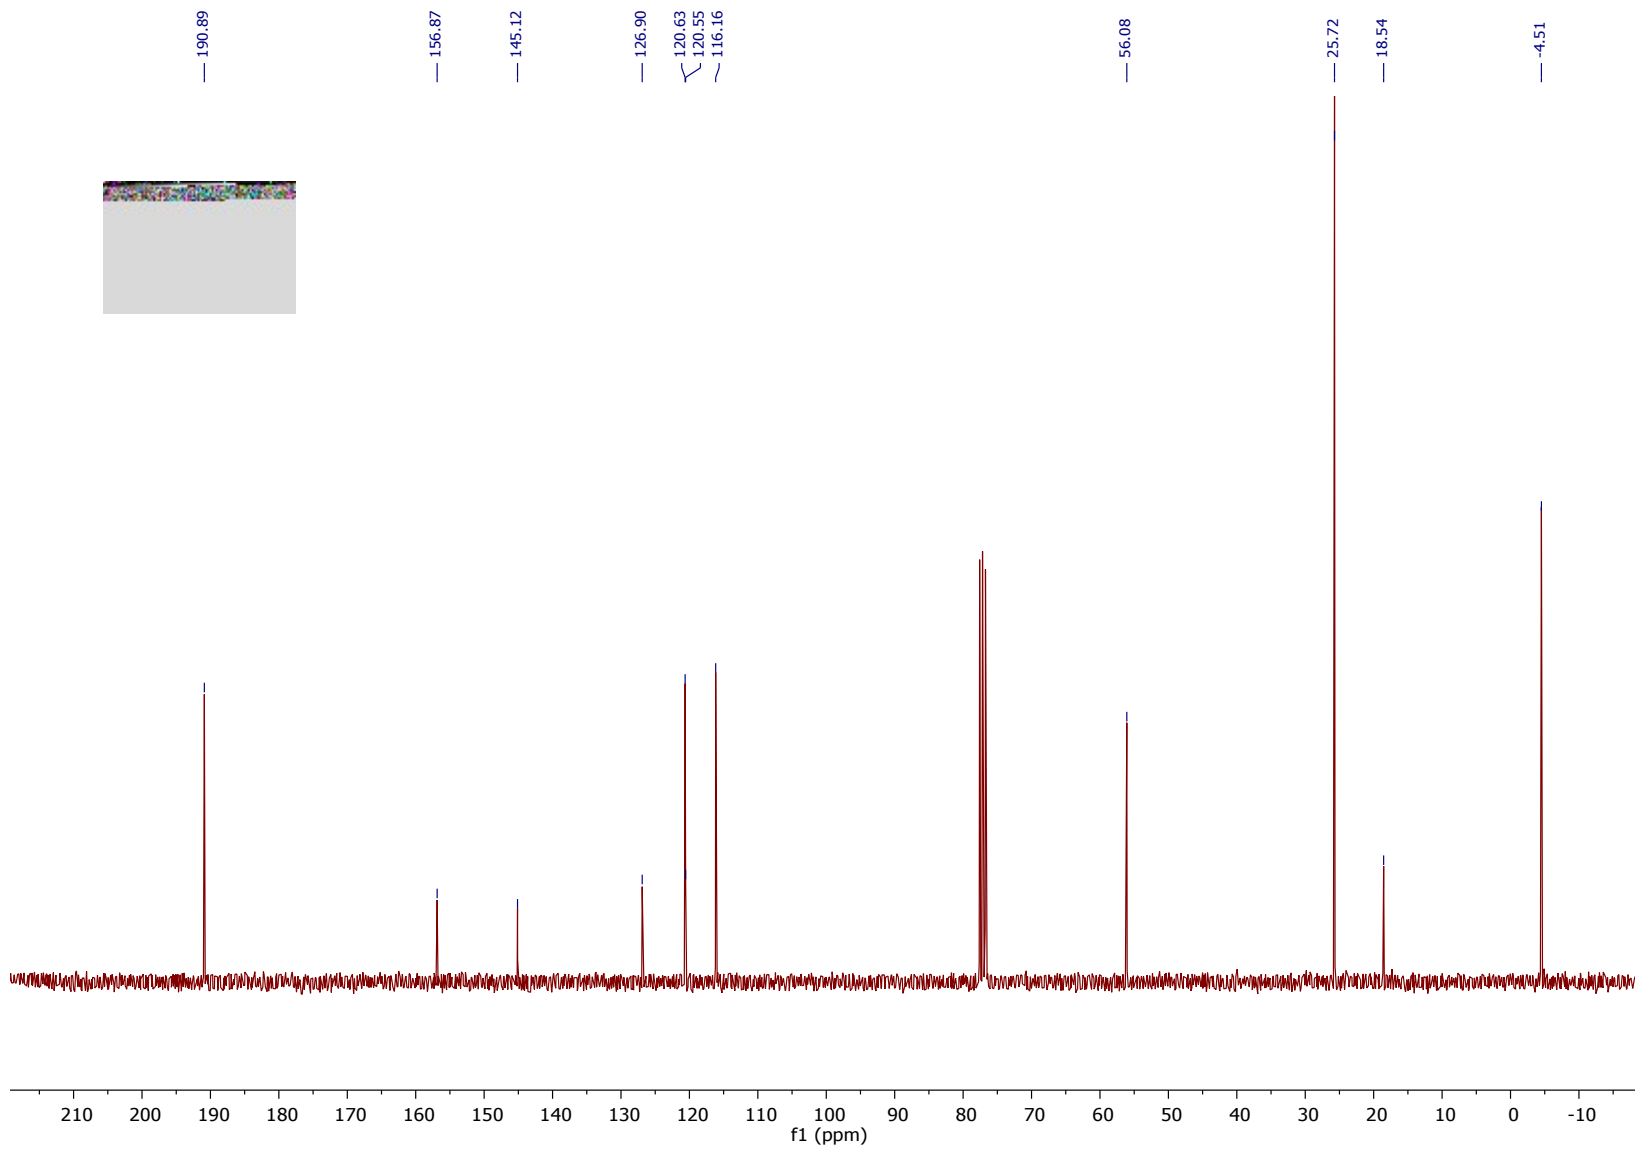

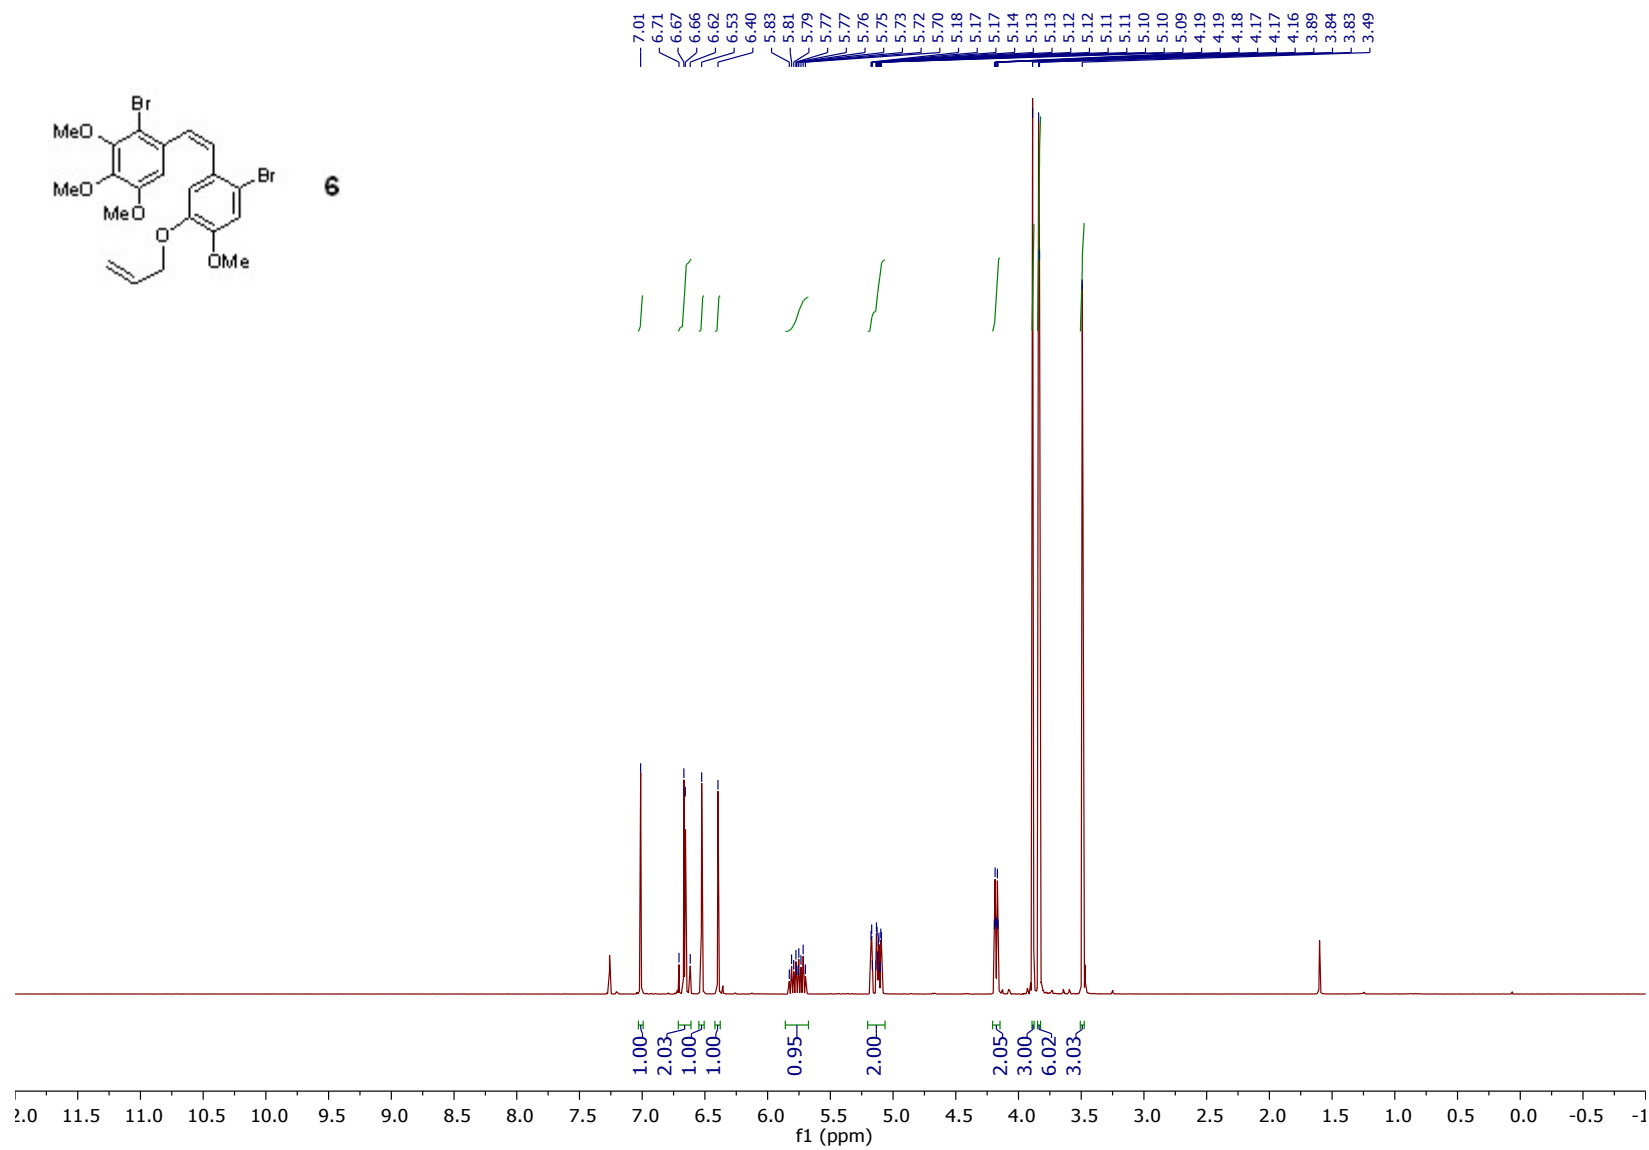

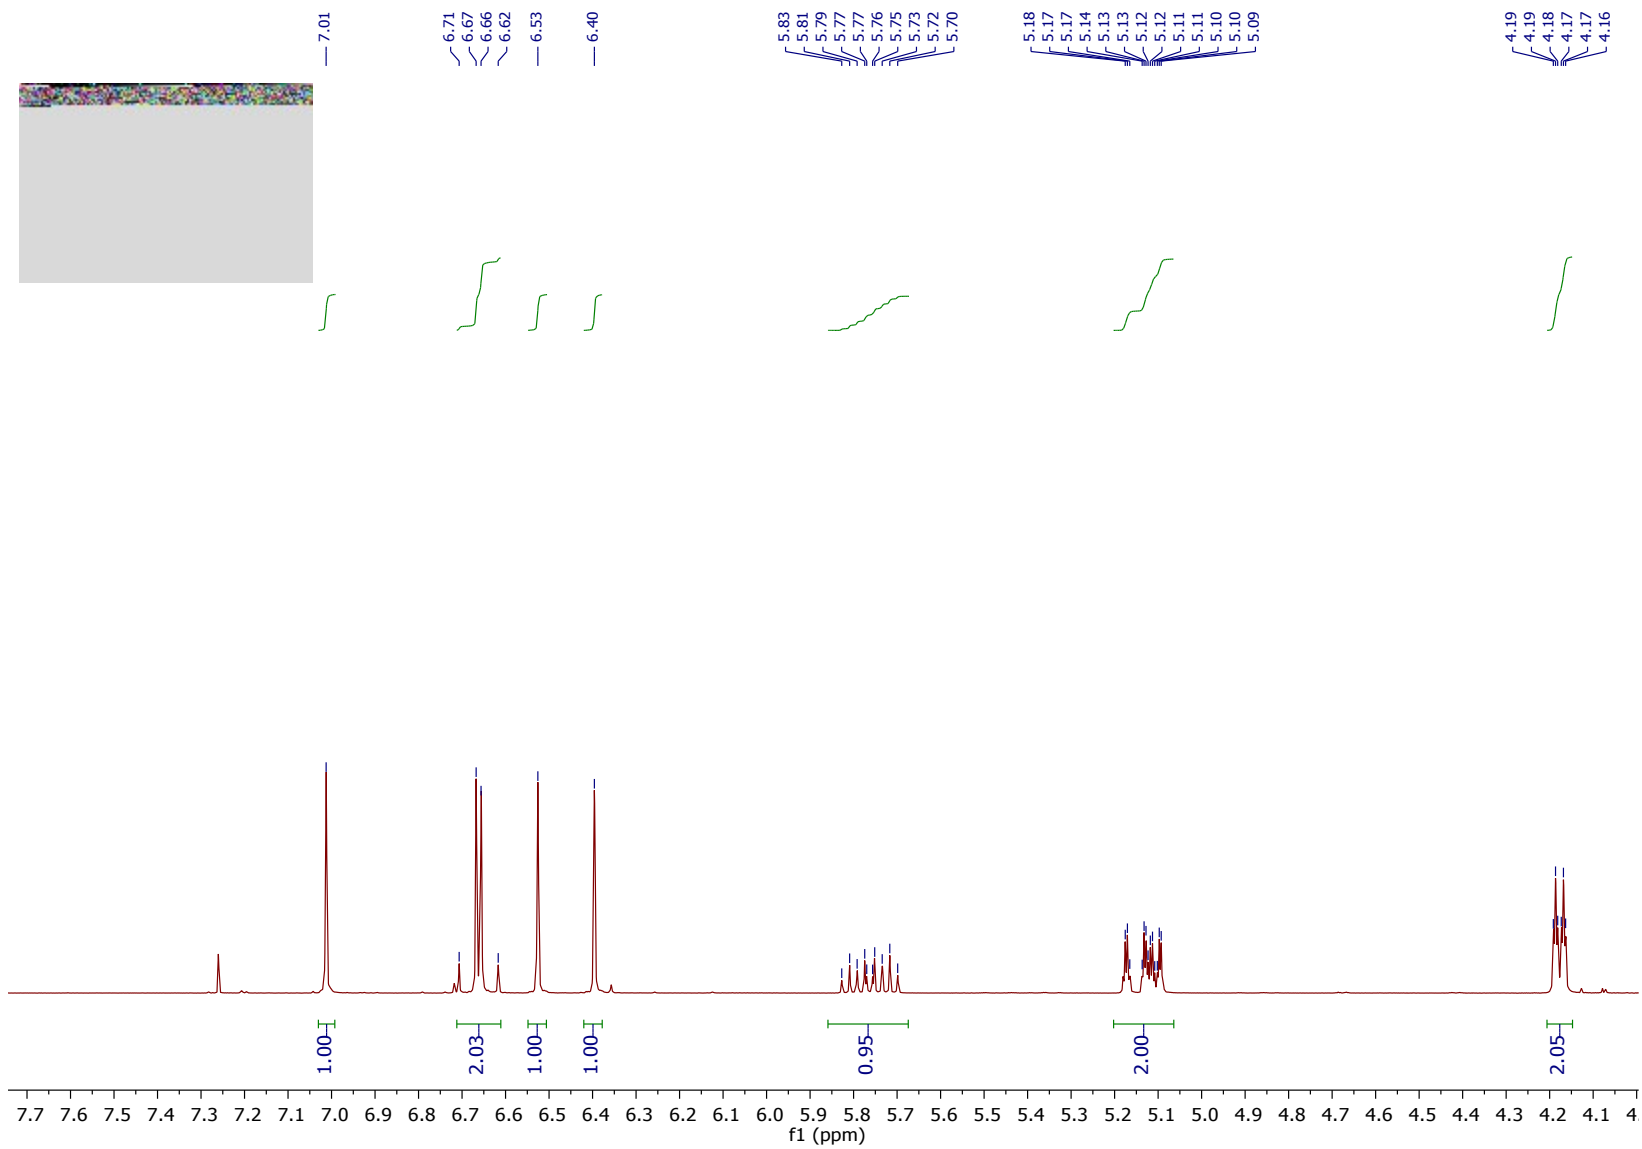



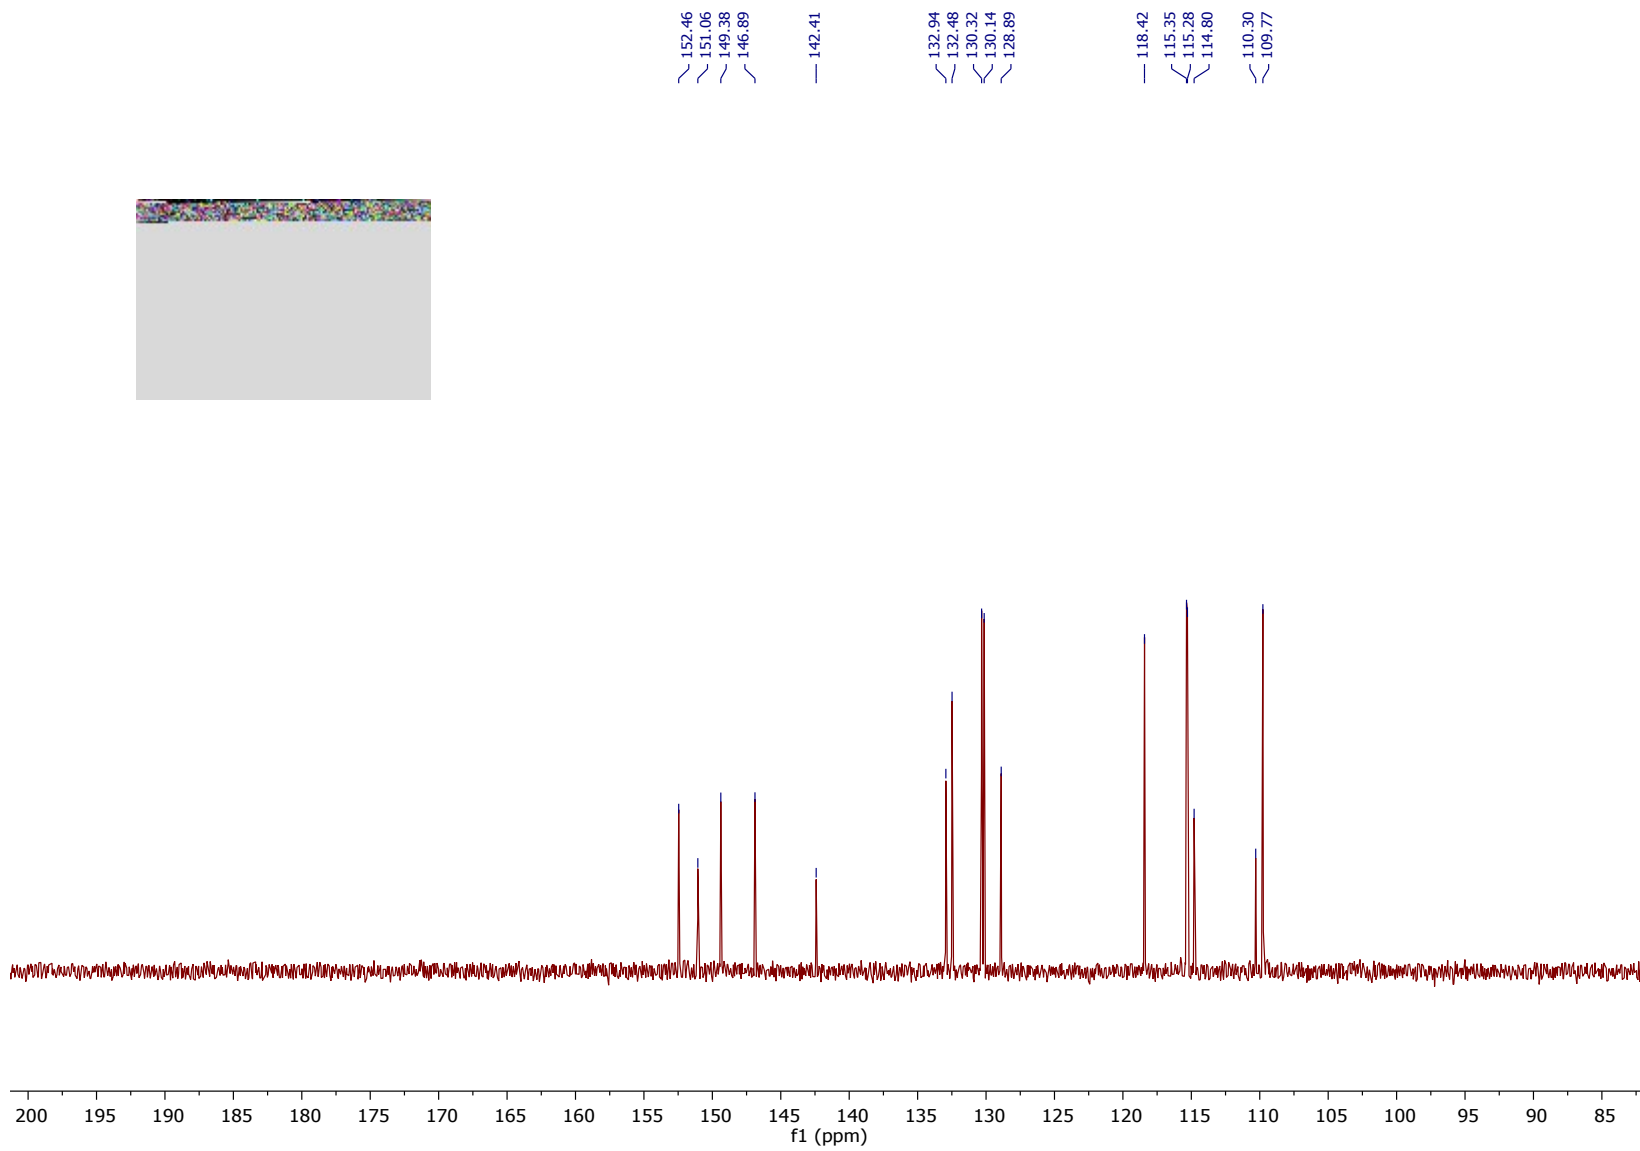

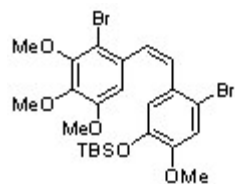

7

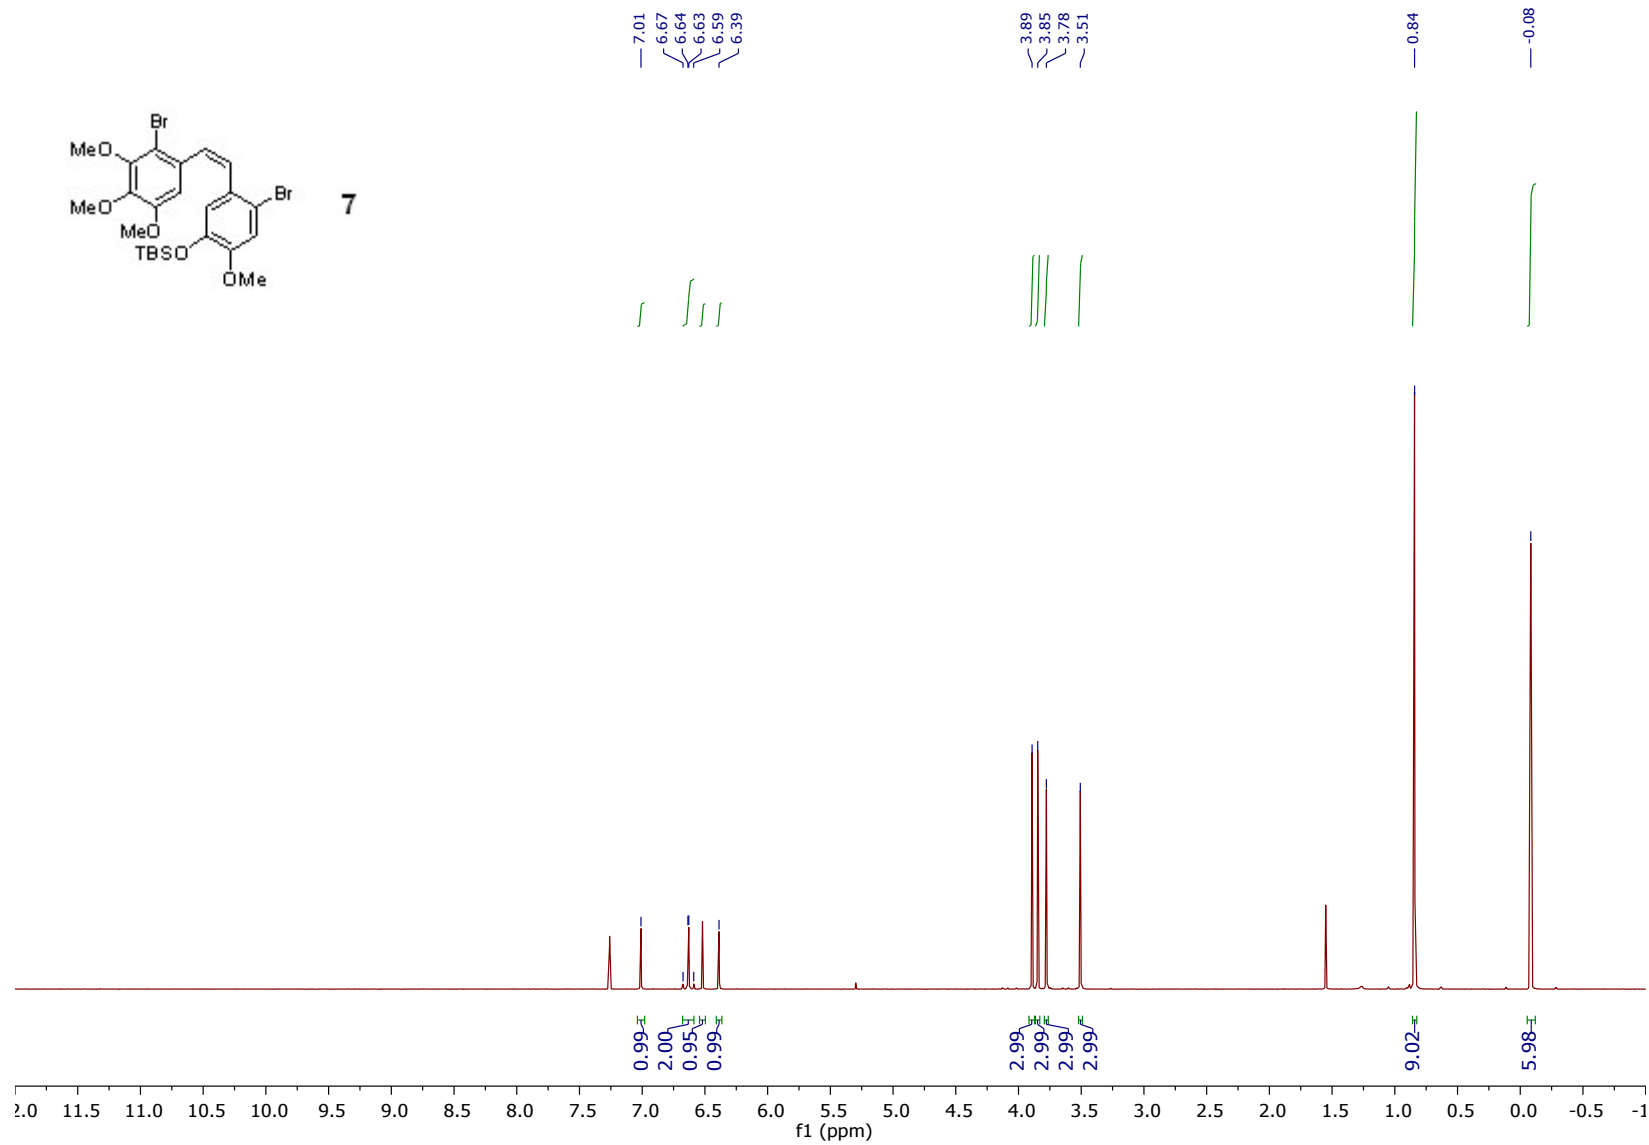

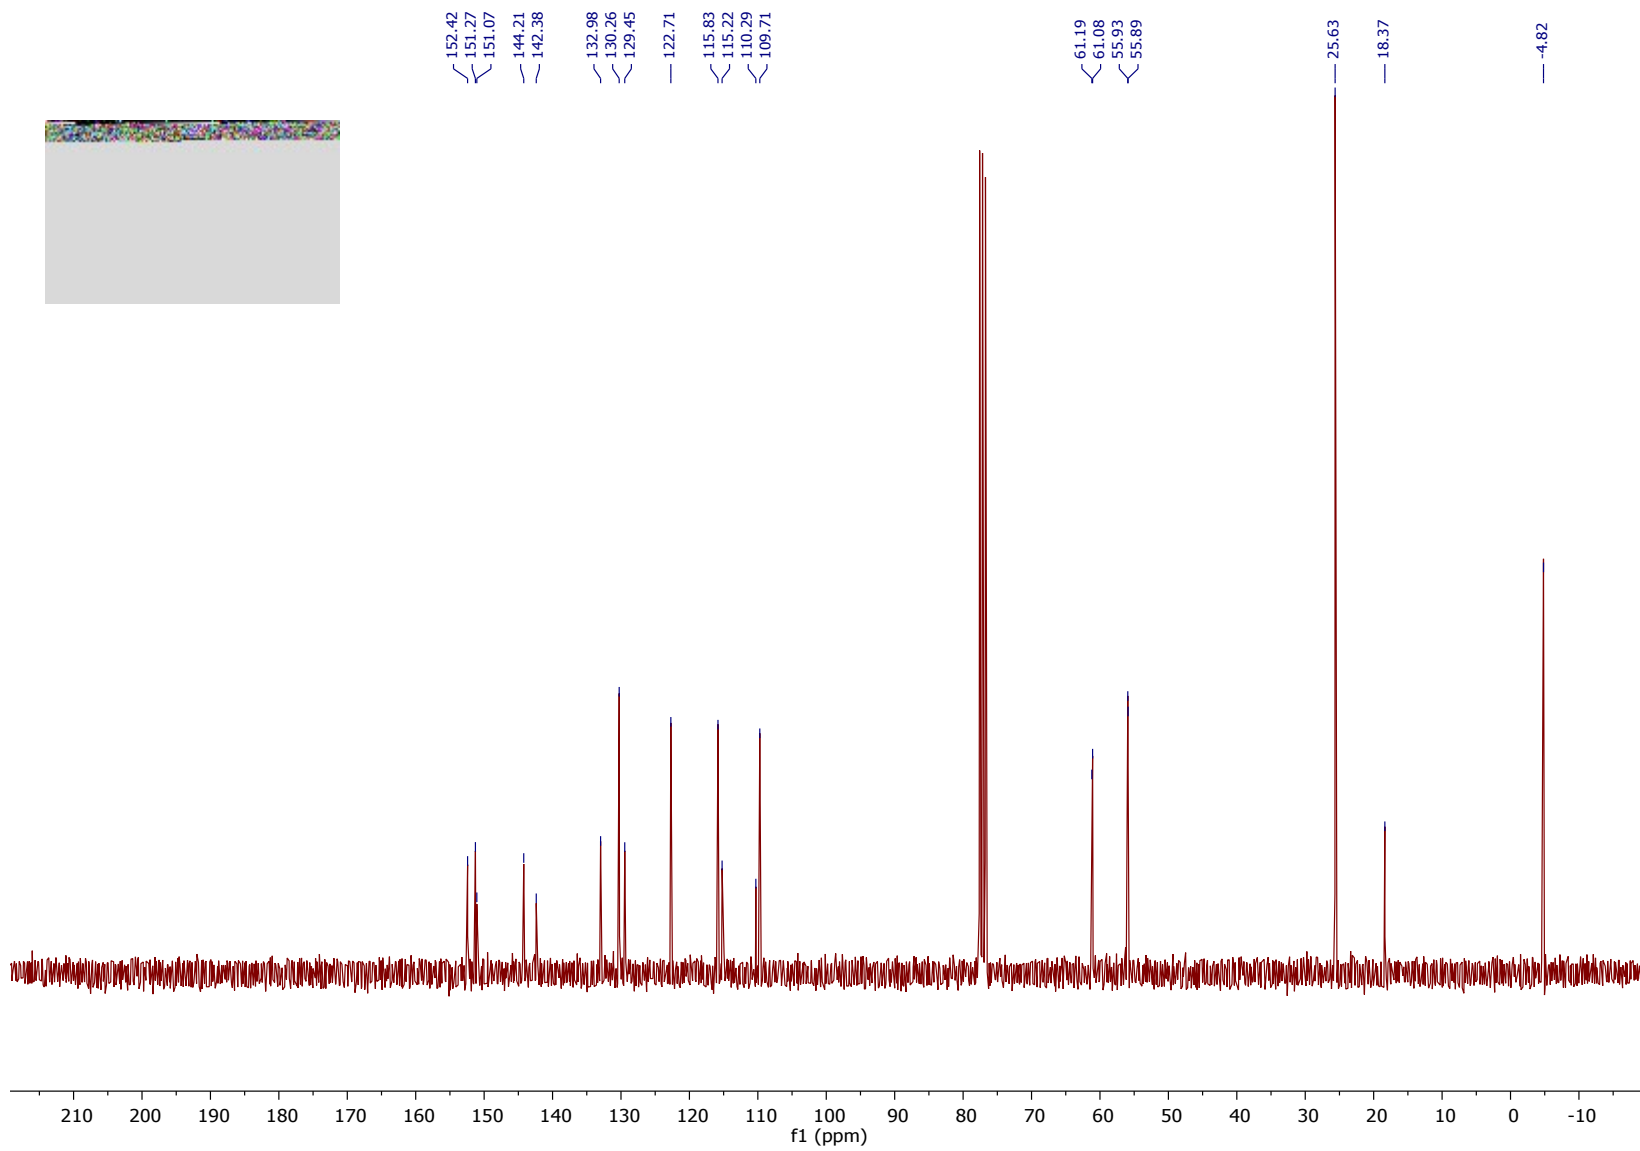

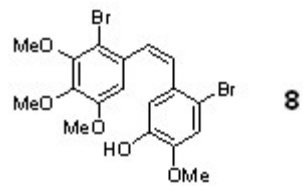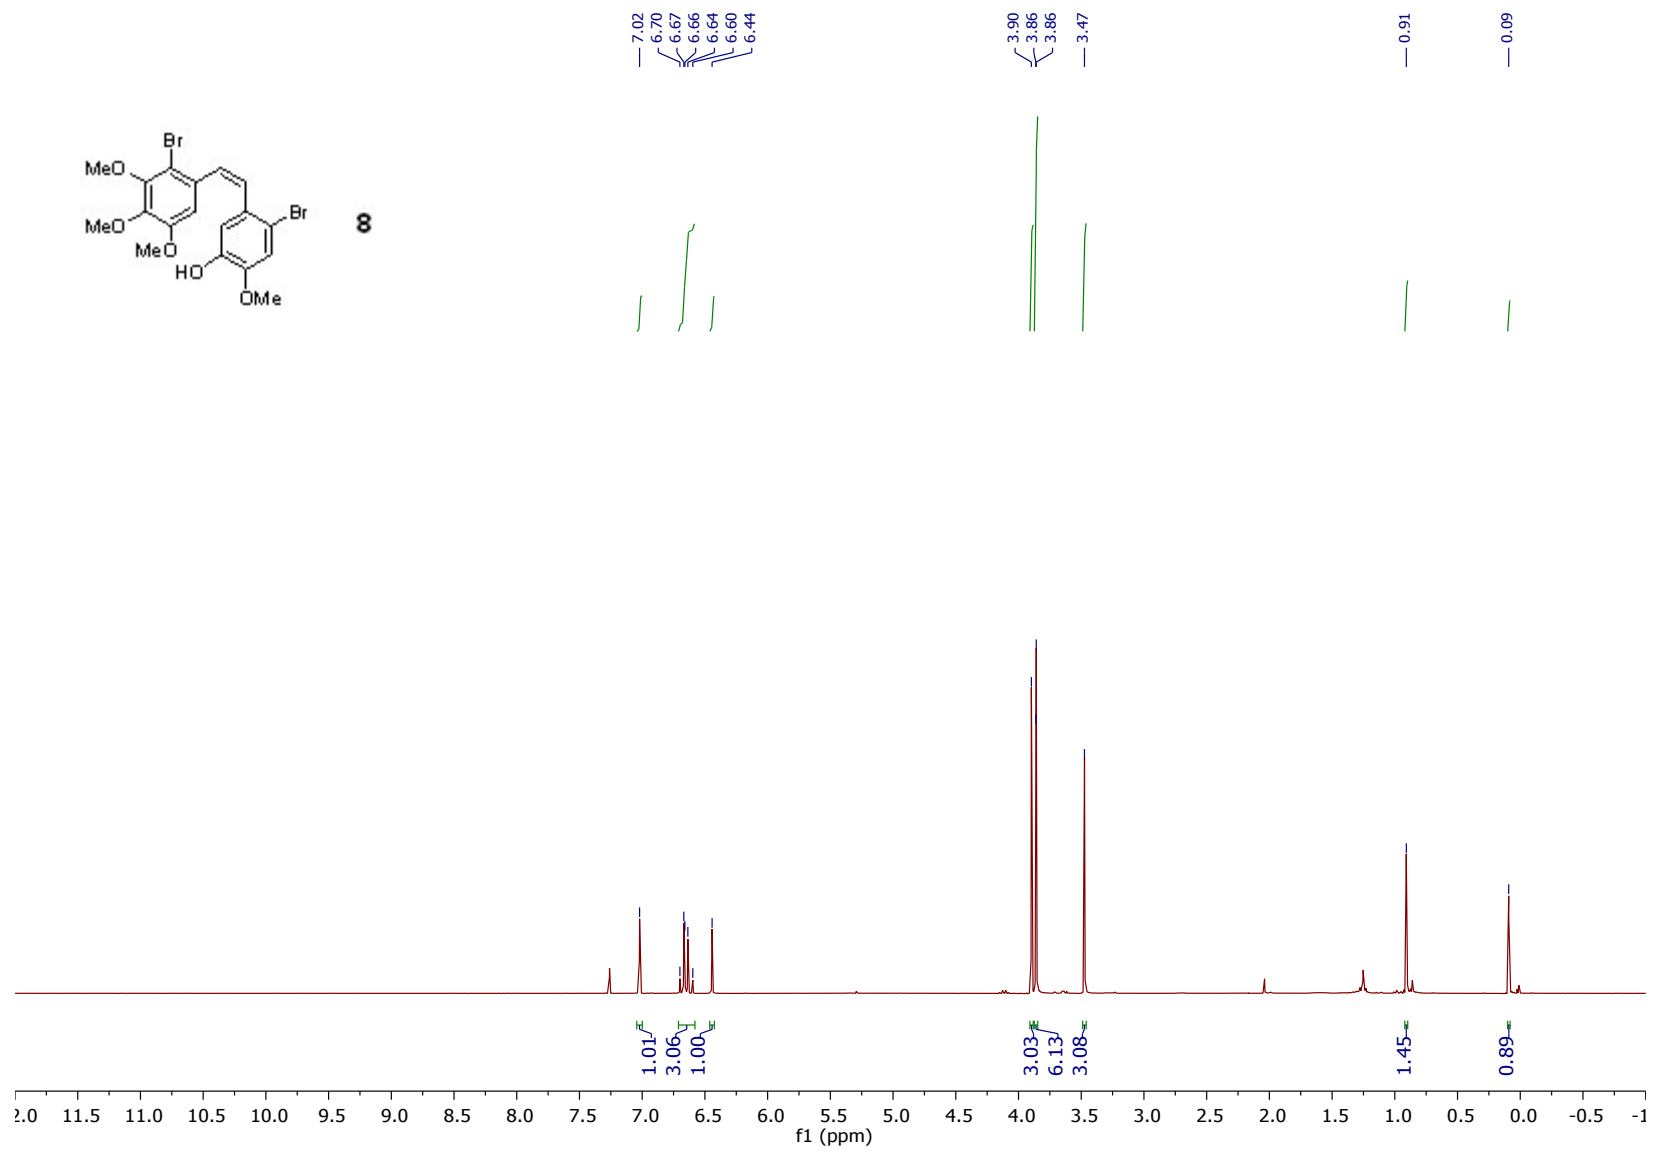

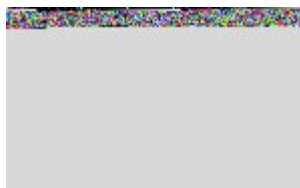

7.02  
6.70  
6.67  
6.66  
6.64  
6.60  
6.44

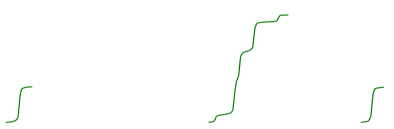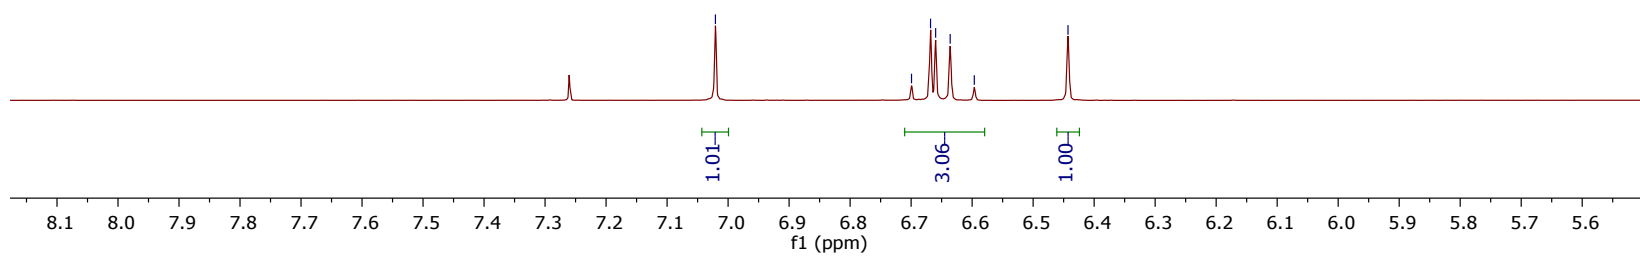

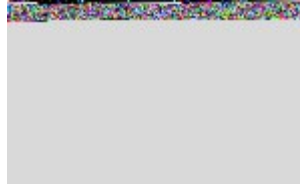

152.48  
151.24  
146.93  
145.00  
142.85  
132.54  
130.49  
130.39  
130.26  
116.67  
114.92  
113.70  
111.01  
110.01

61.55  
61.38  
56.60  
56.22

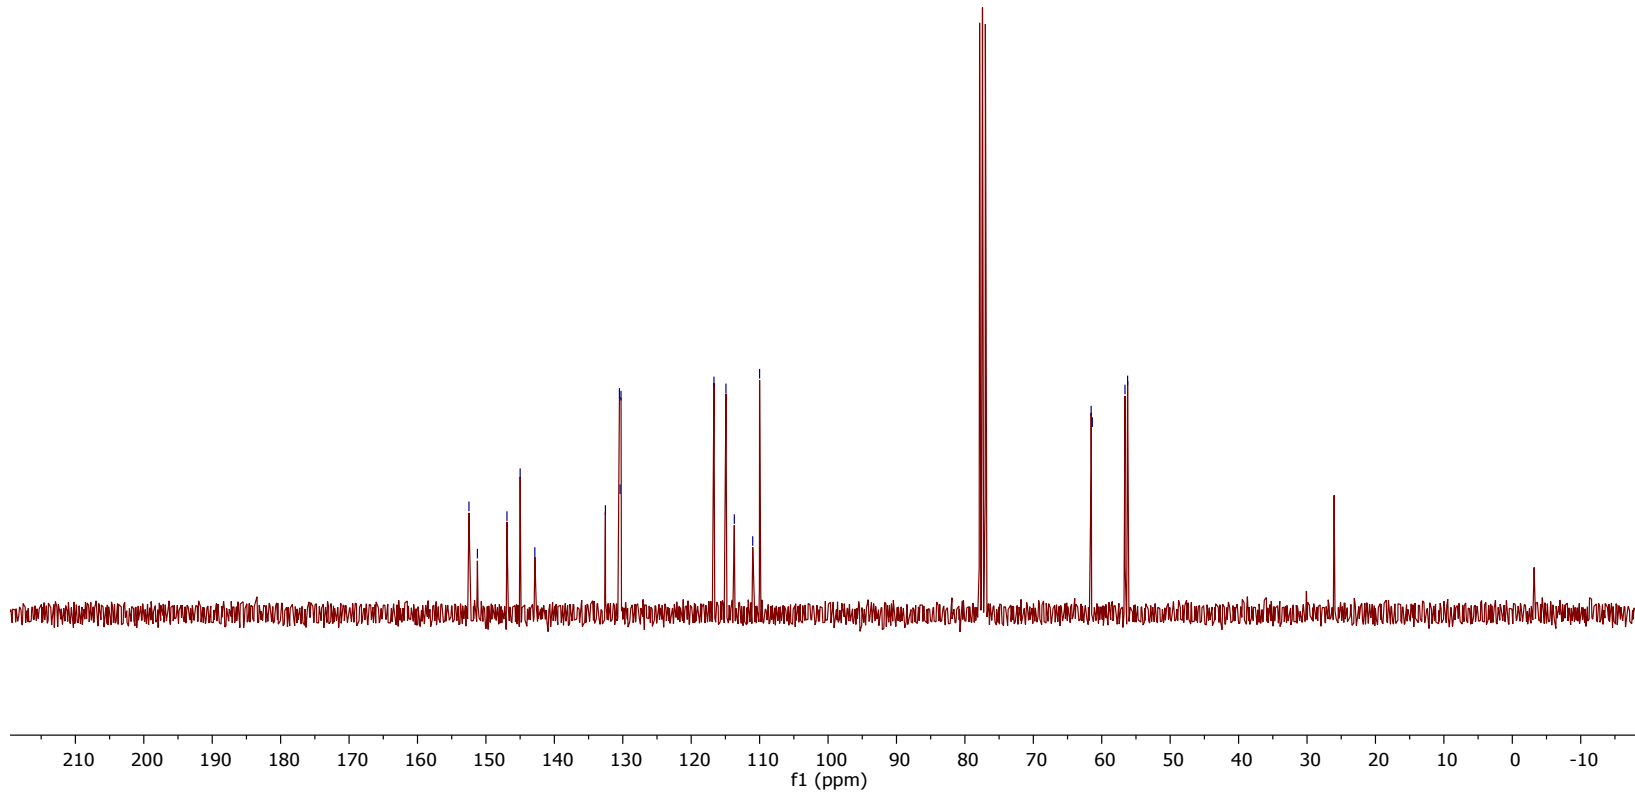

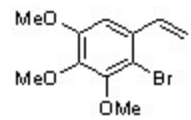

9

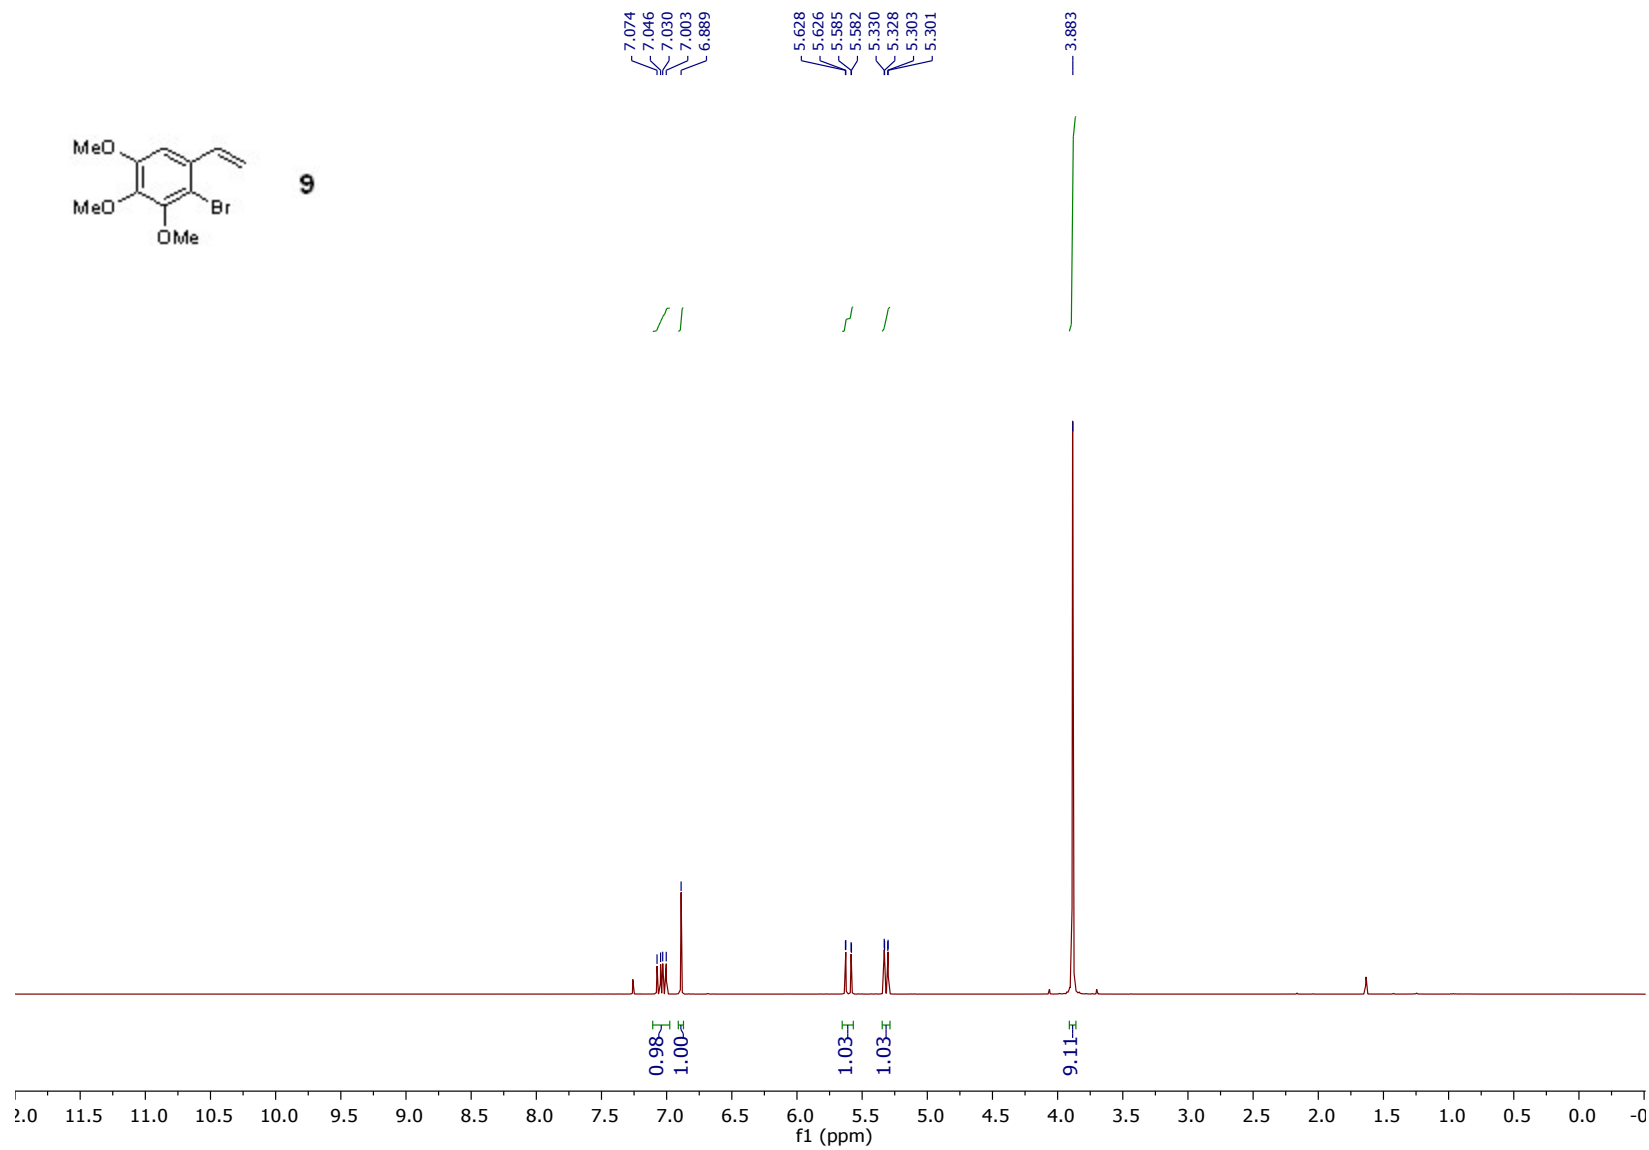

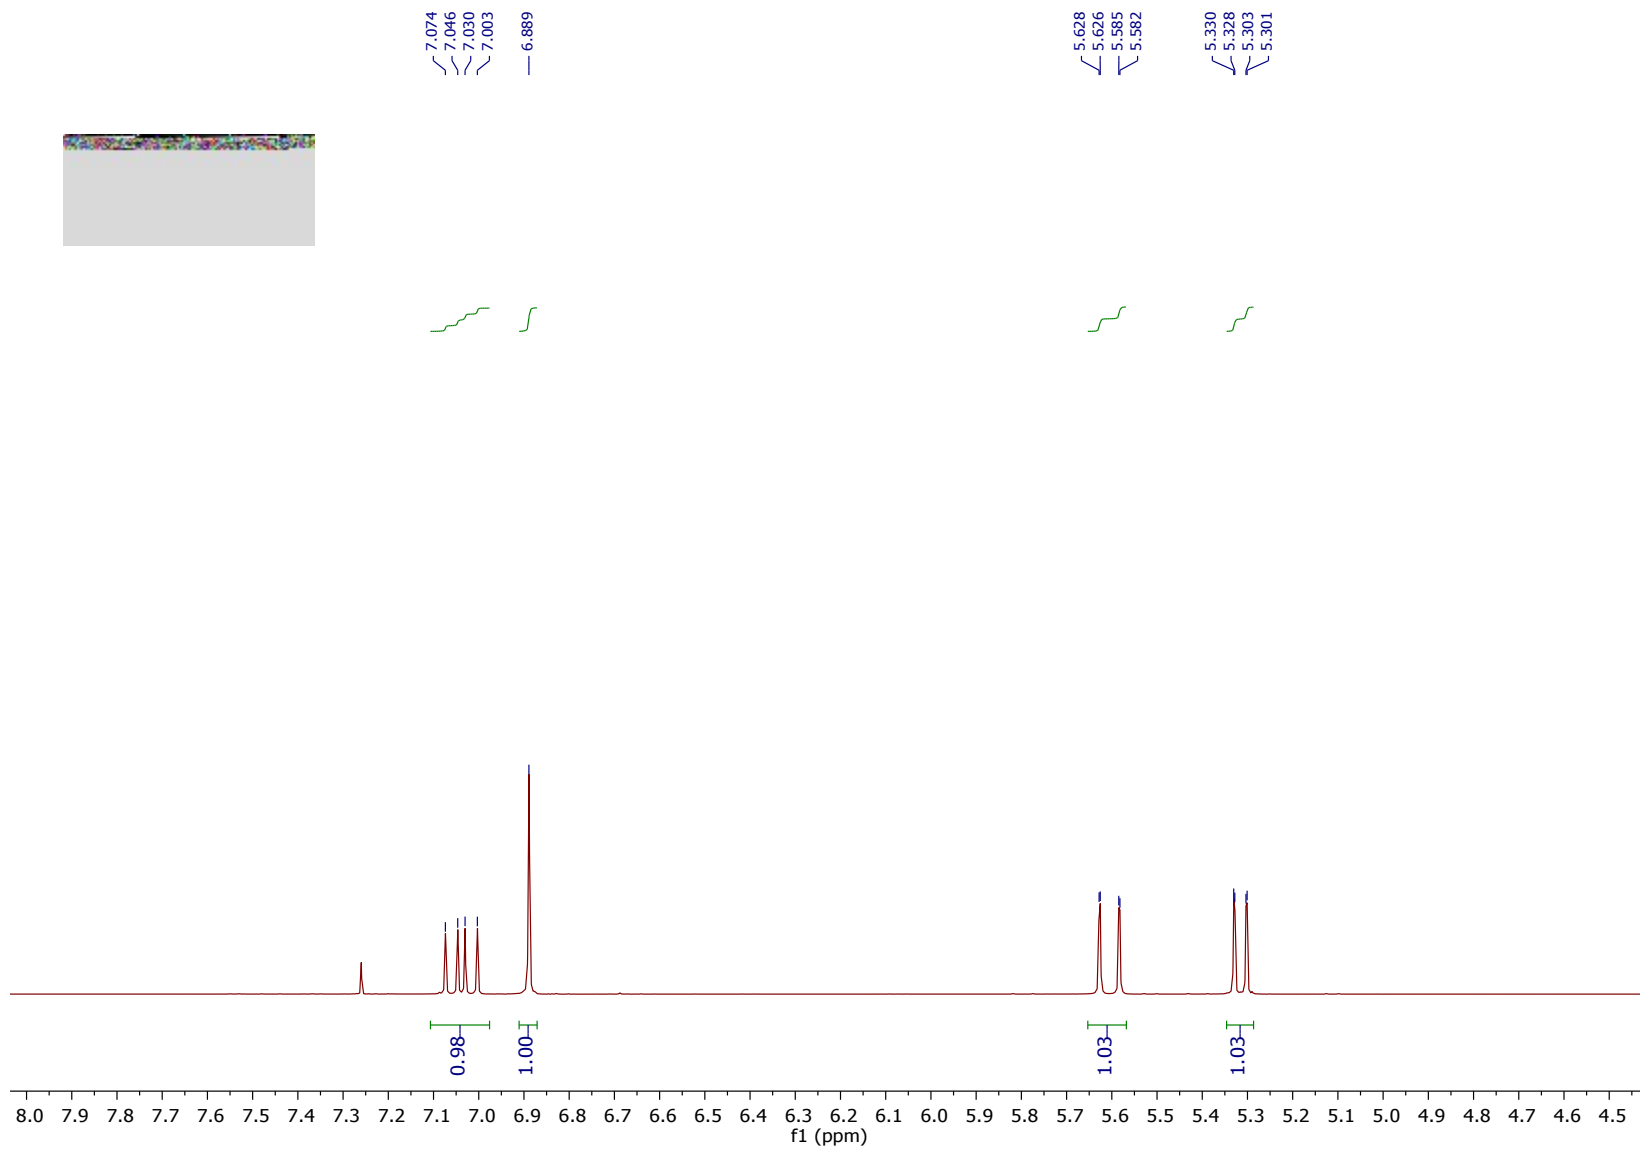



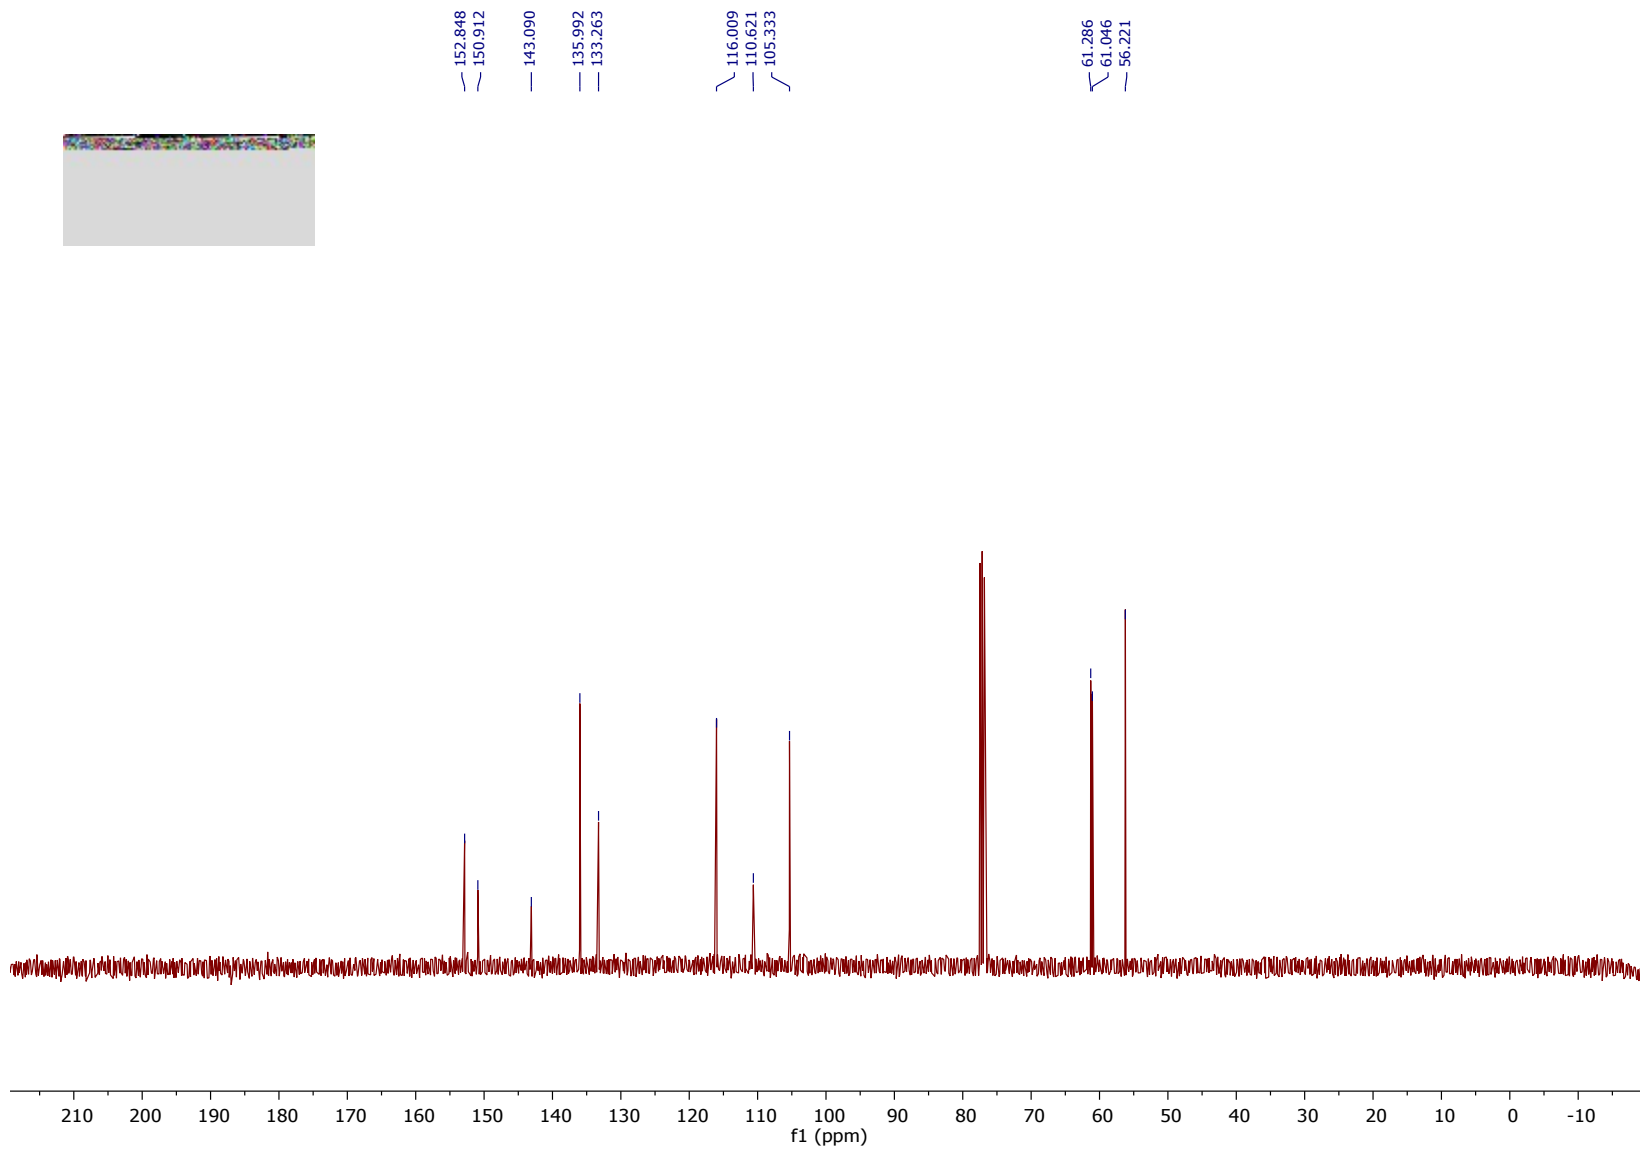

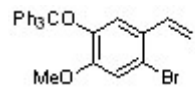

10

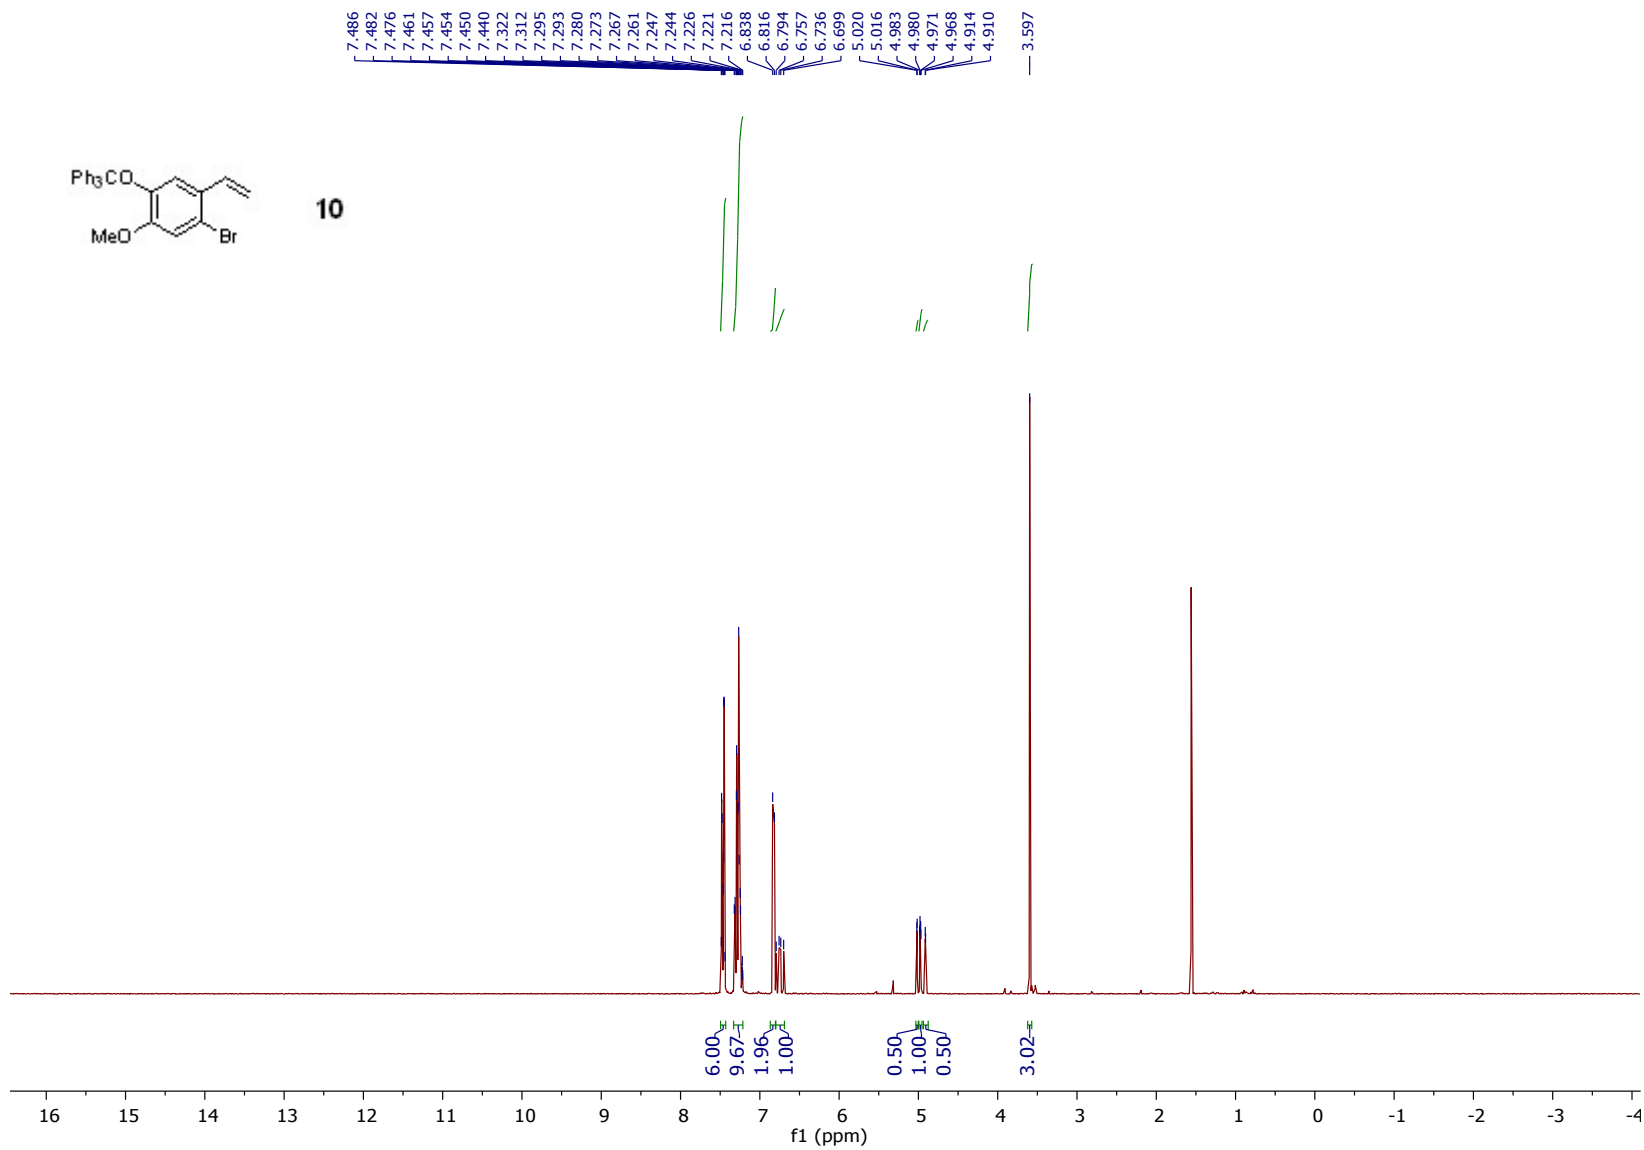

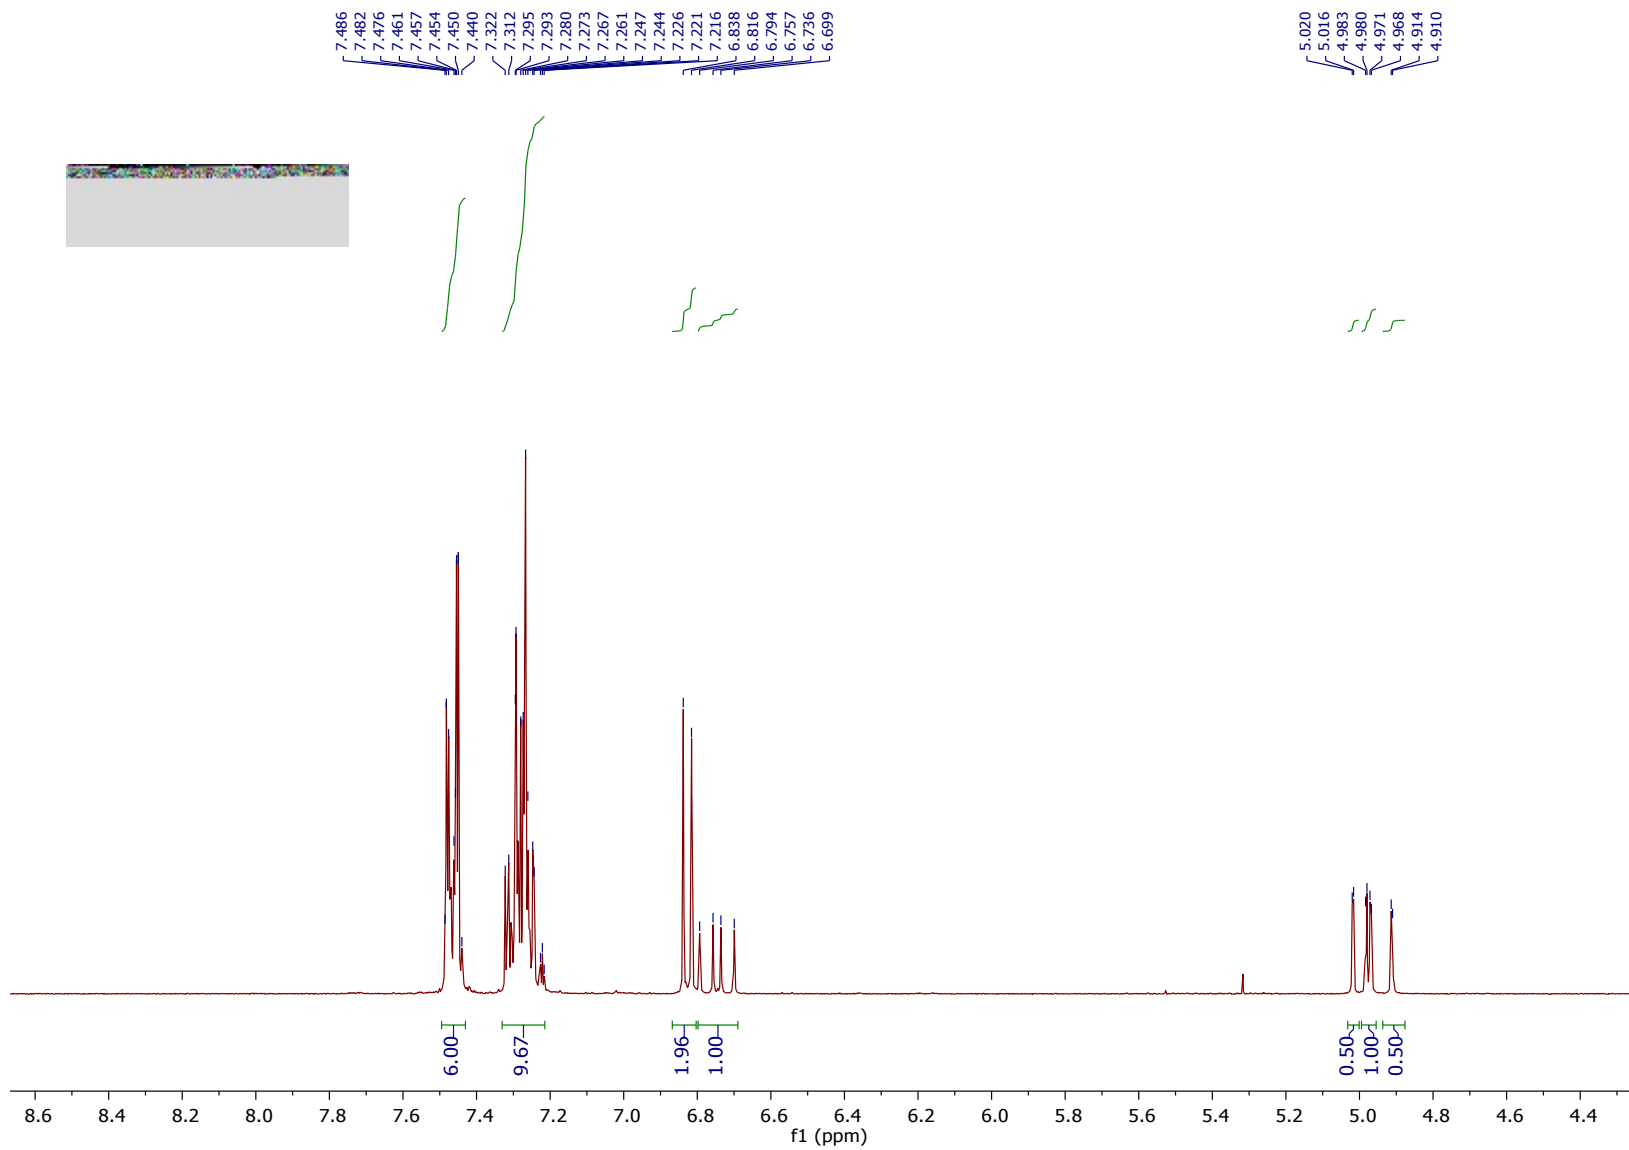

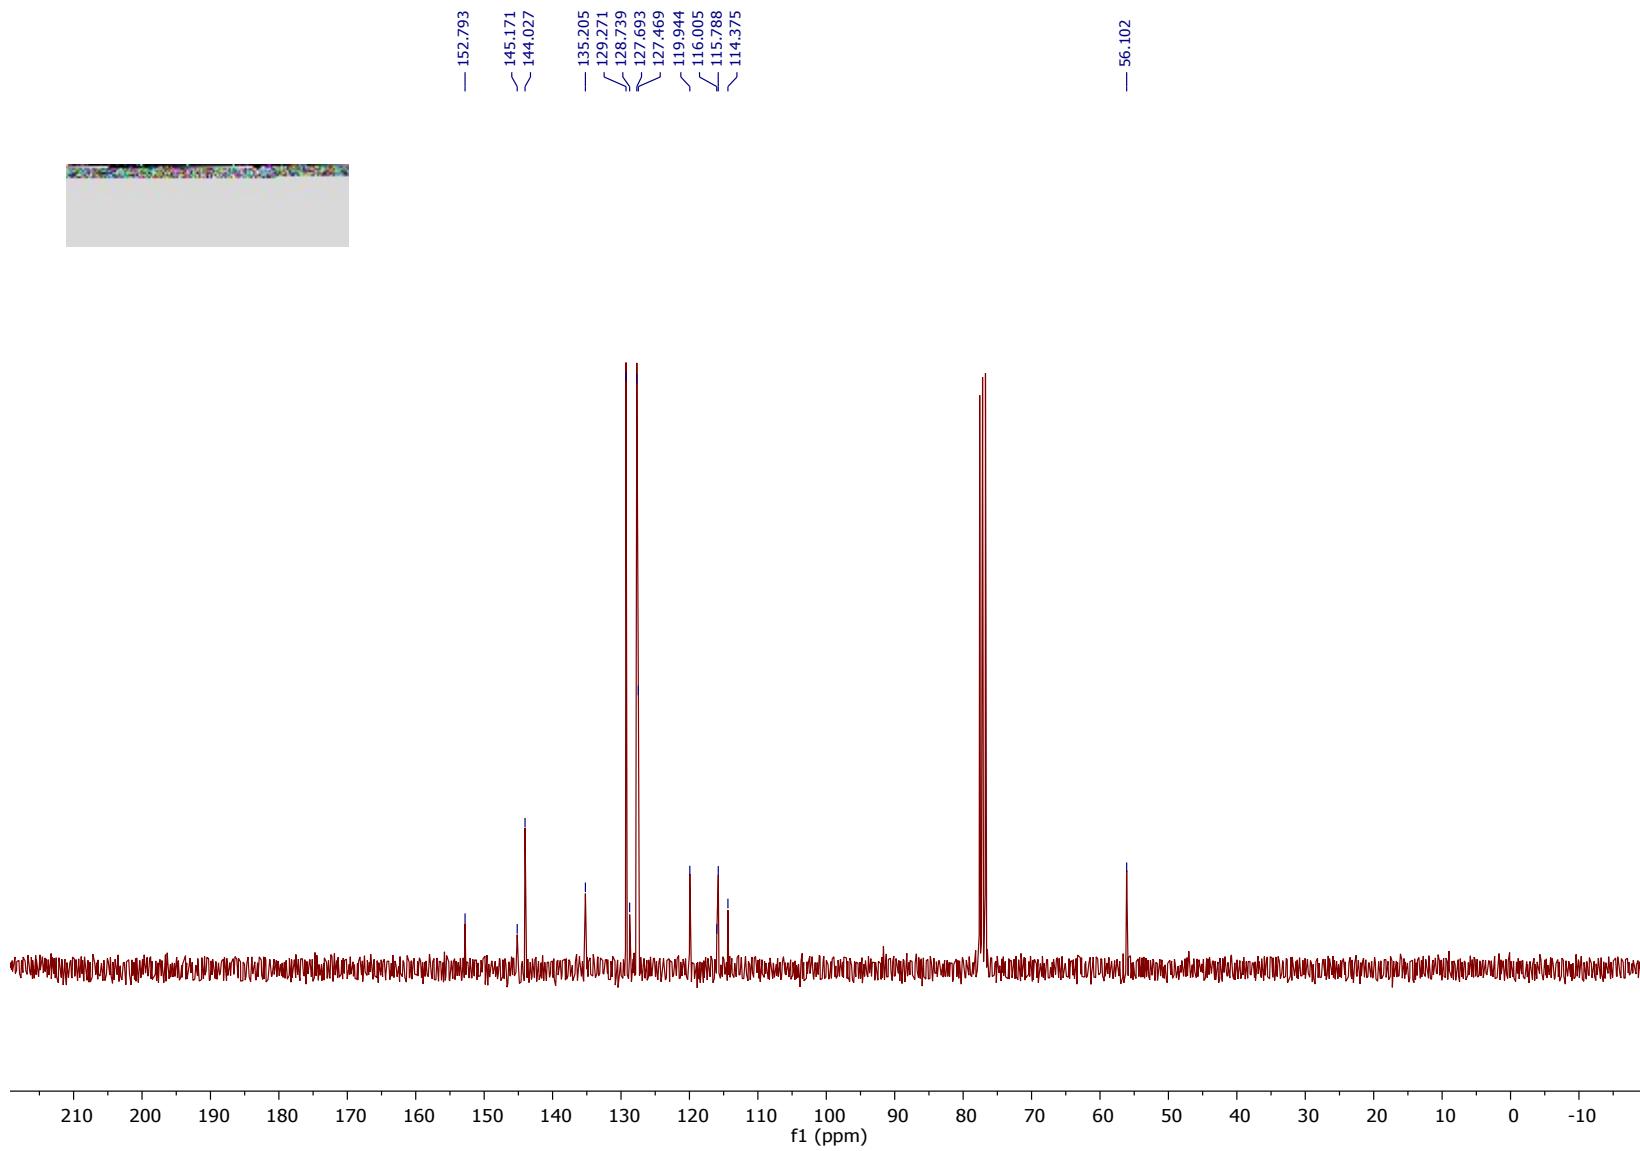

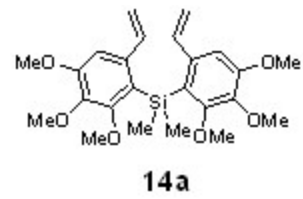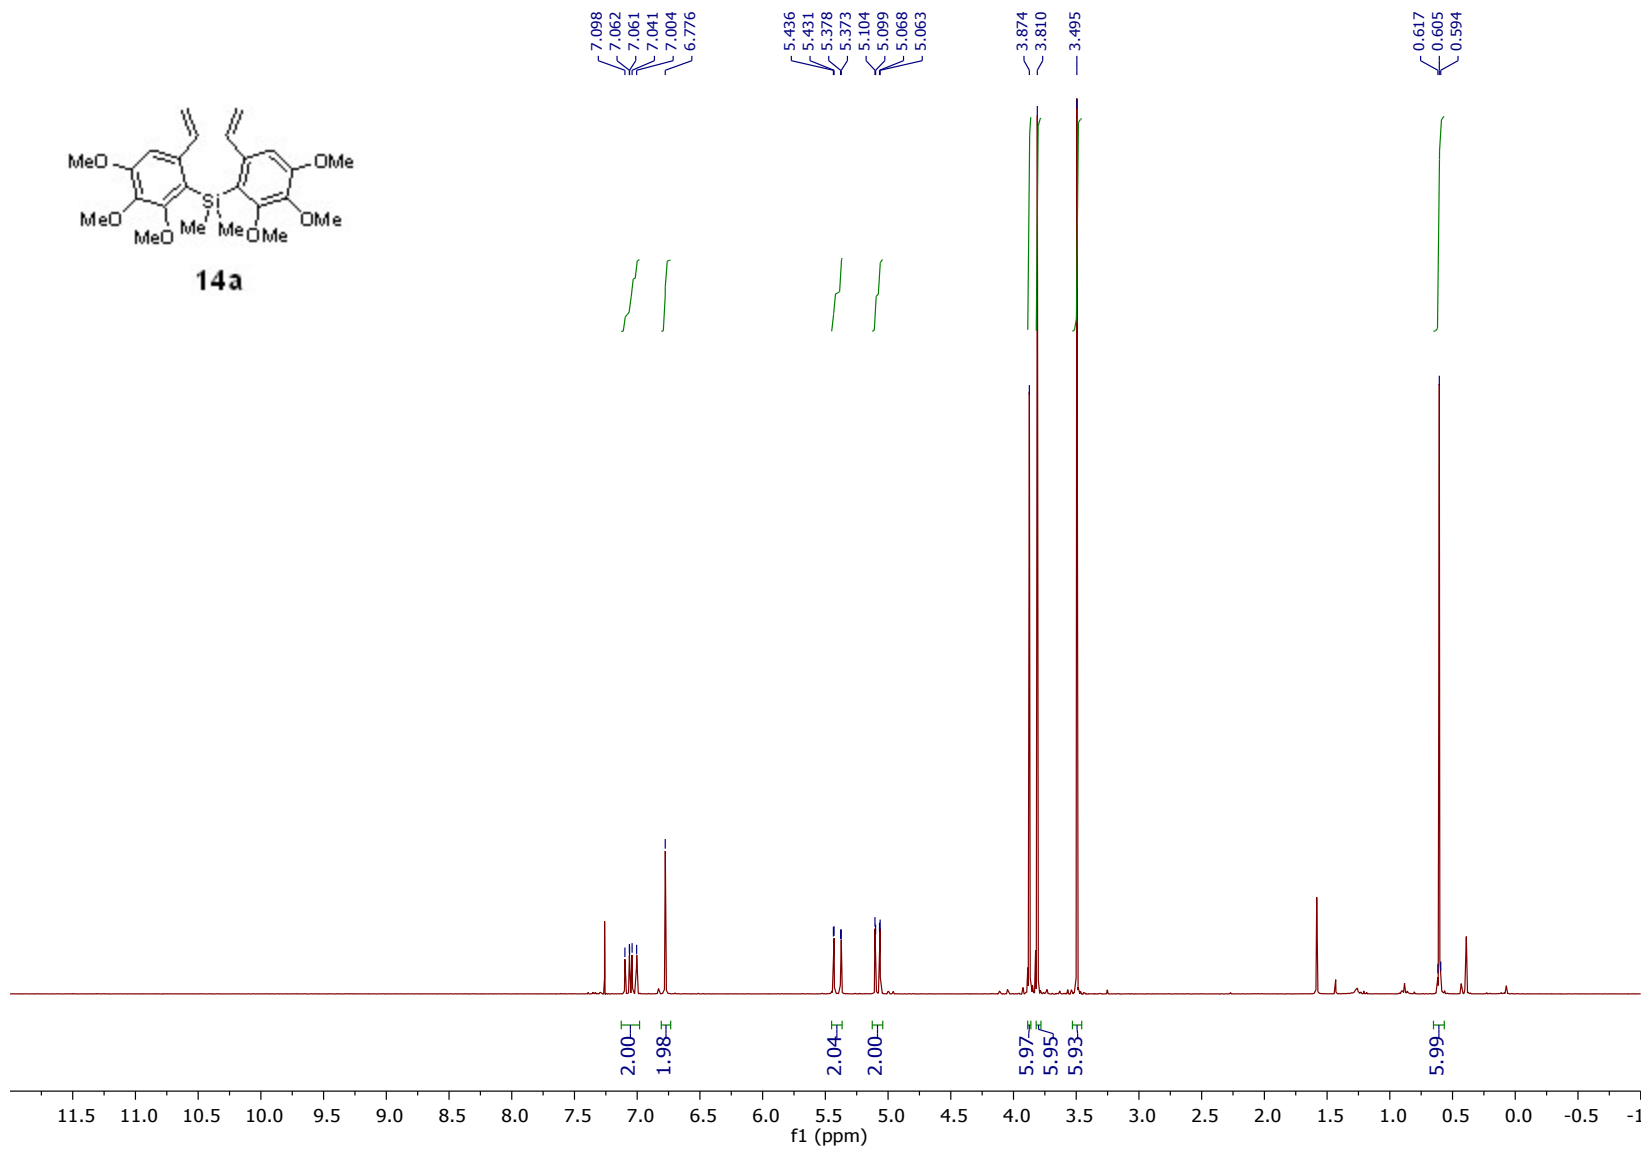

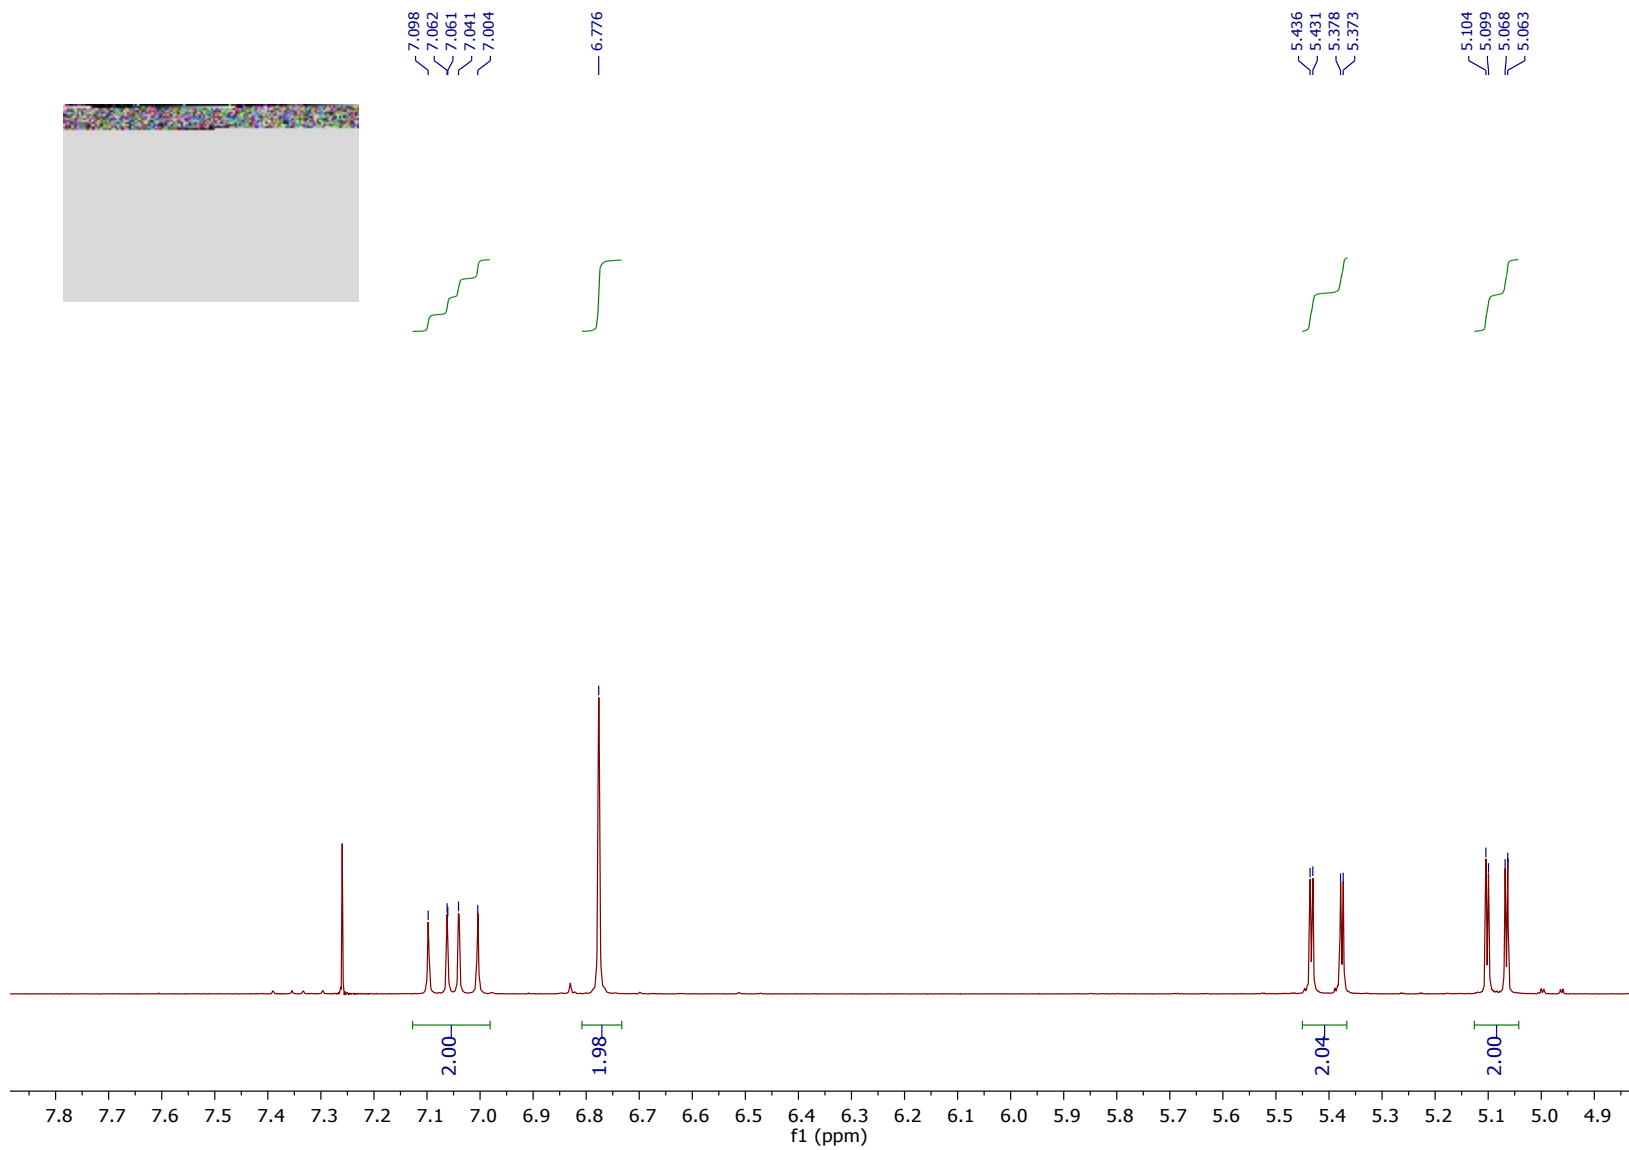

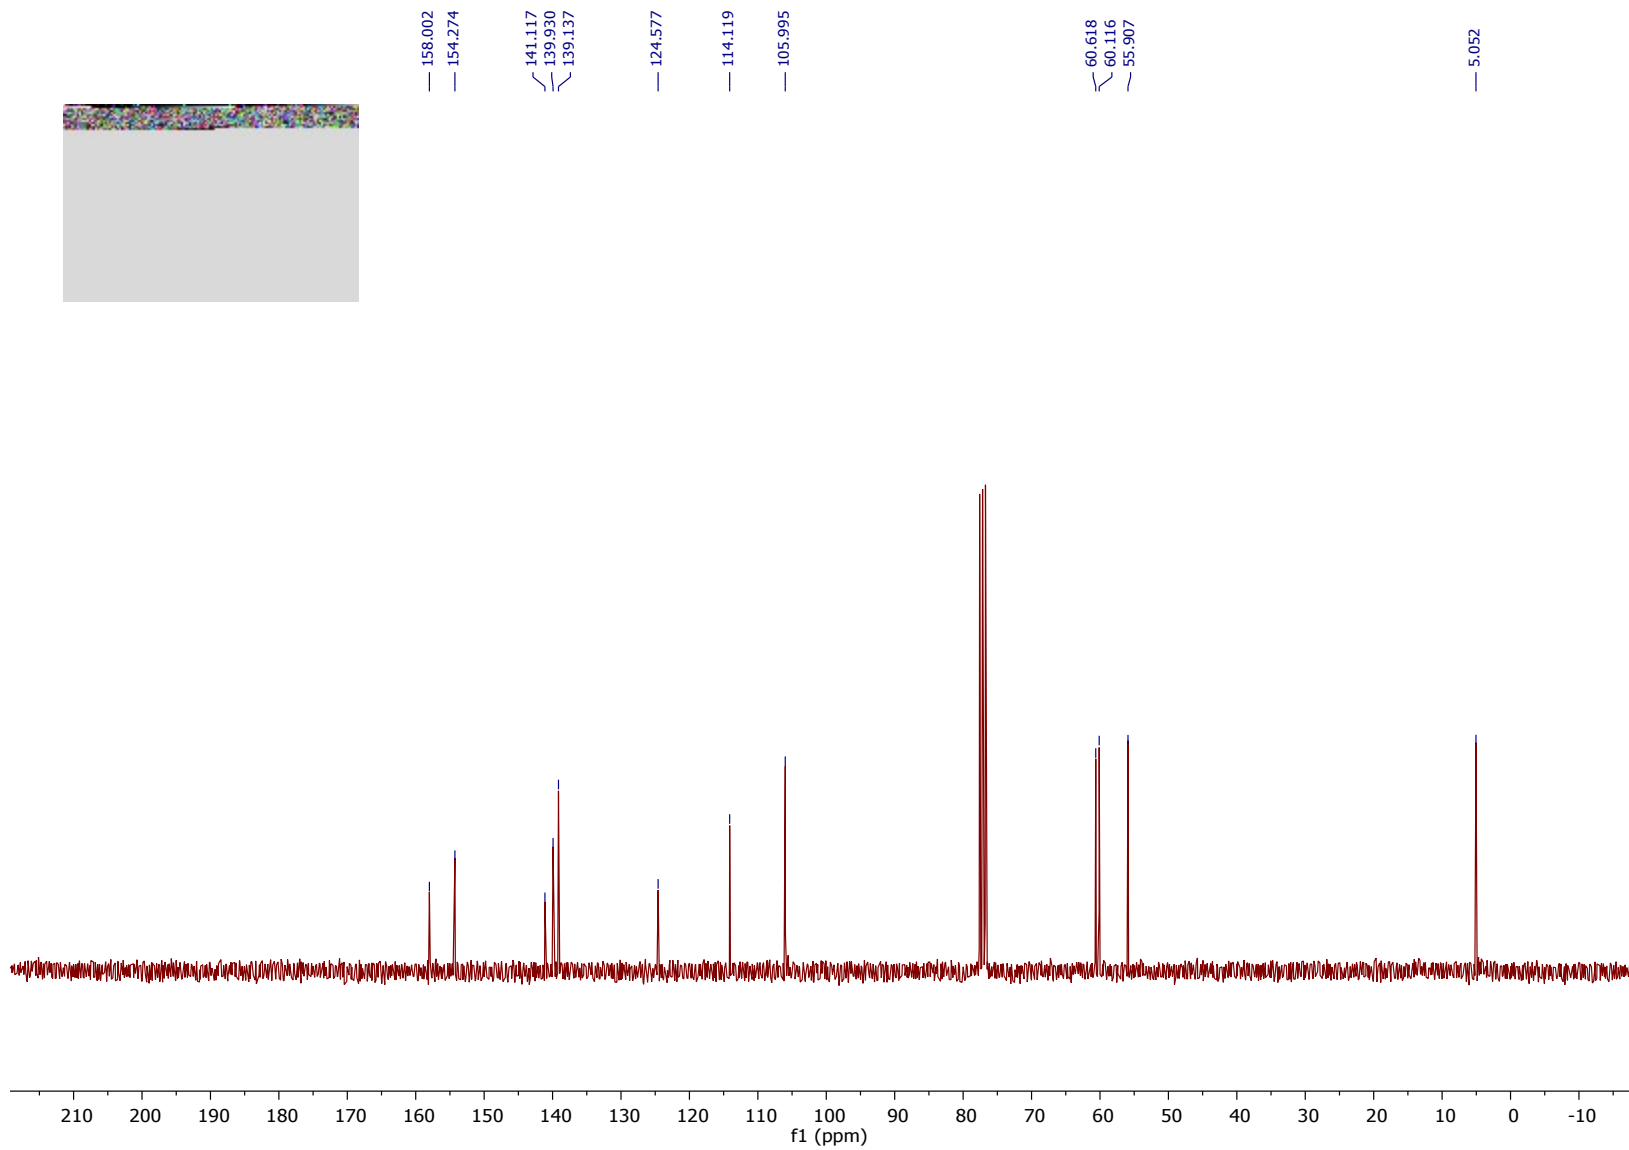

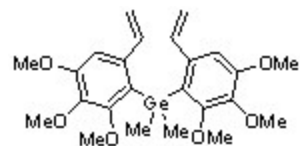

**14b**

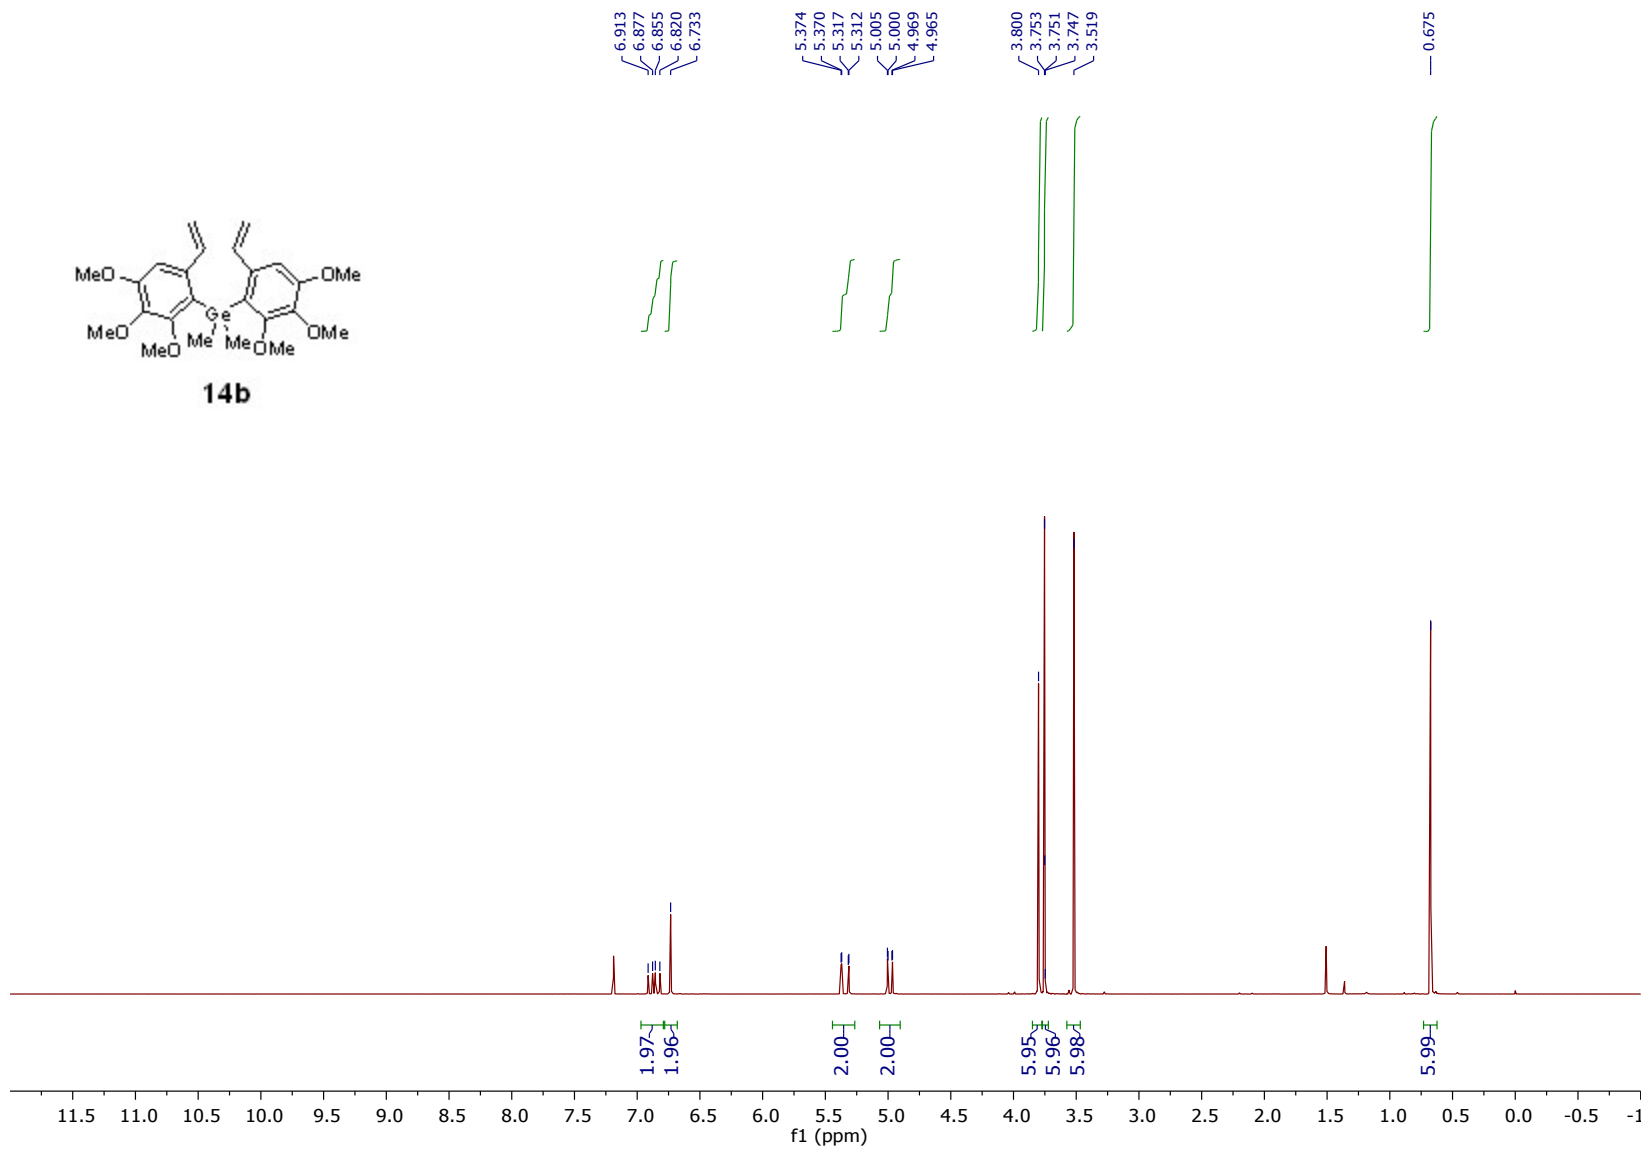



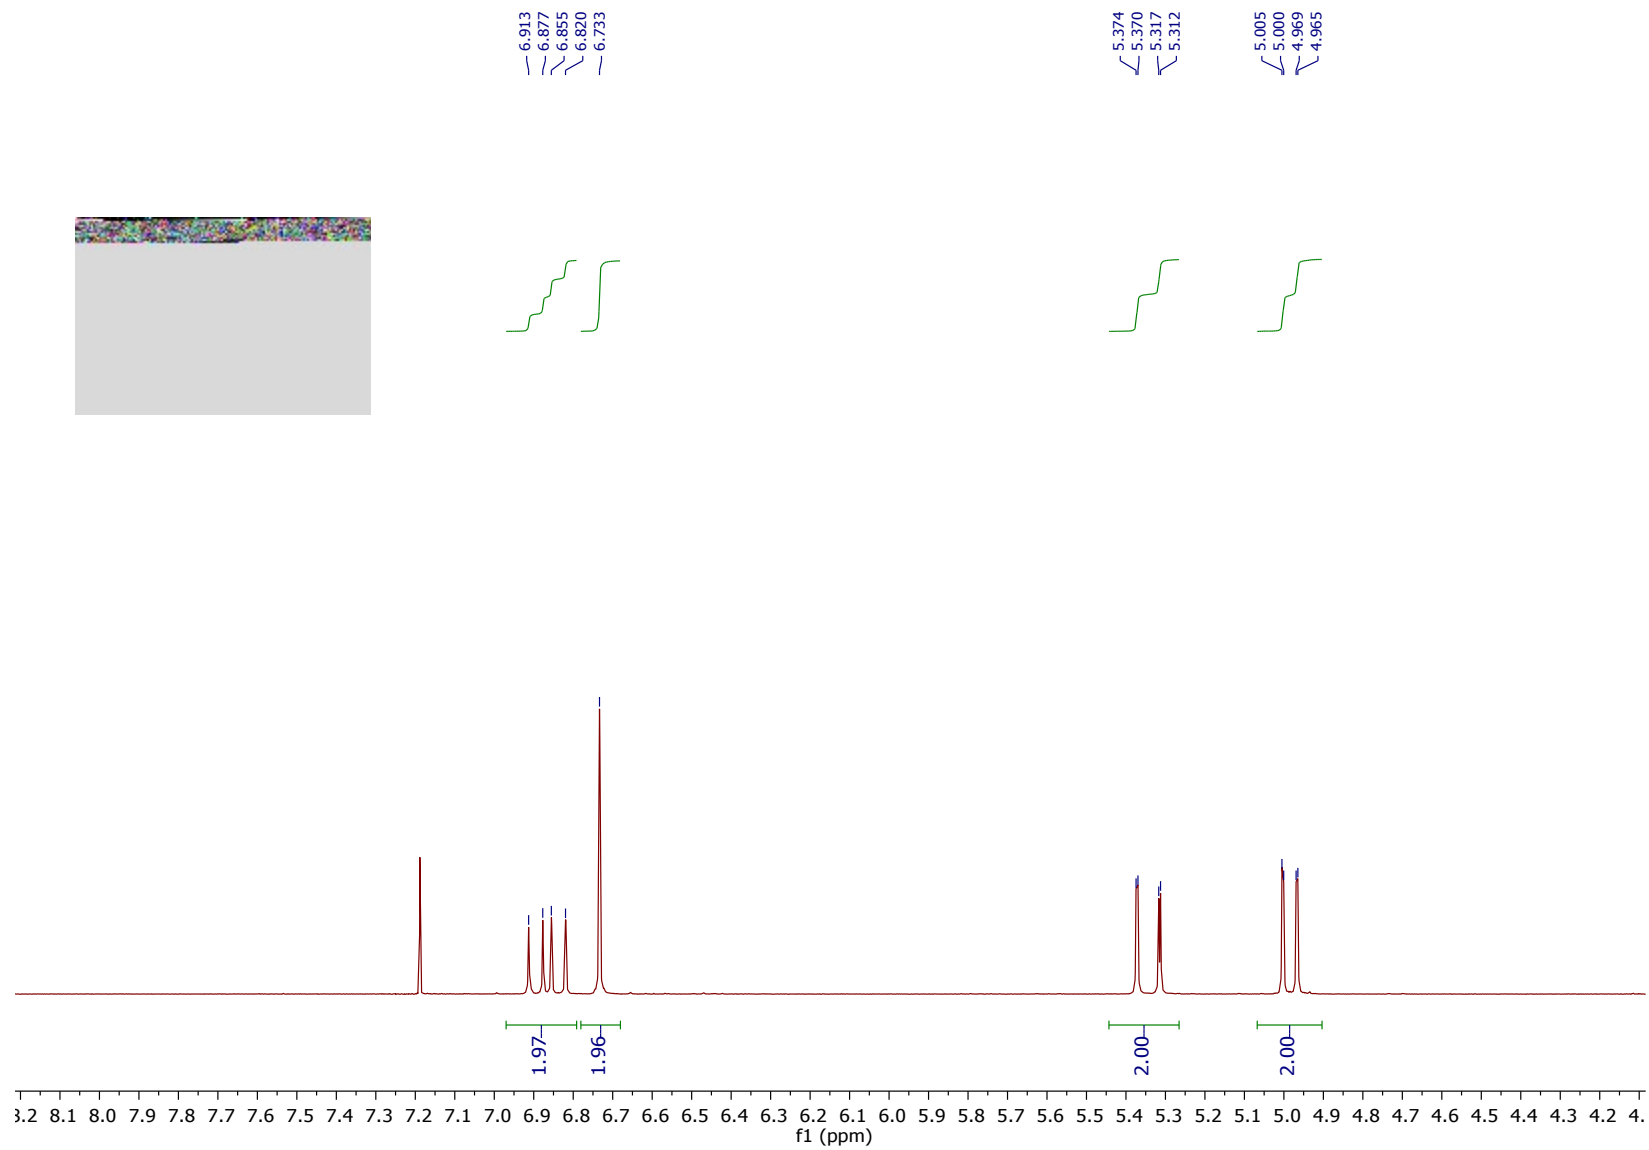

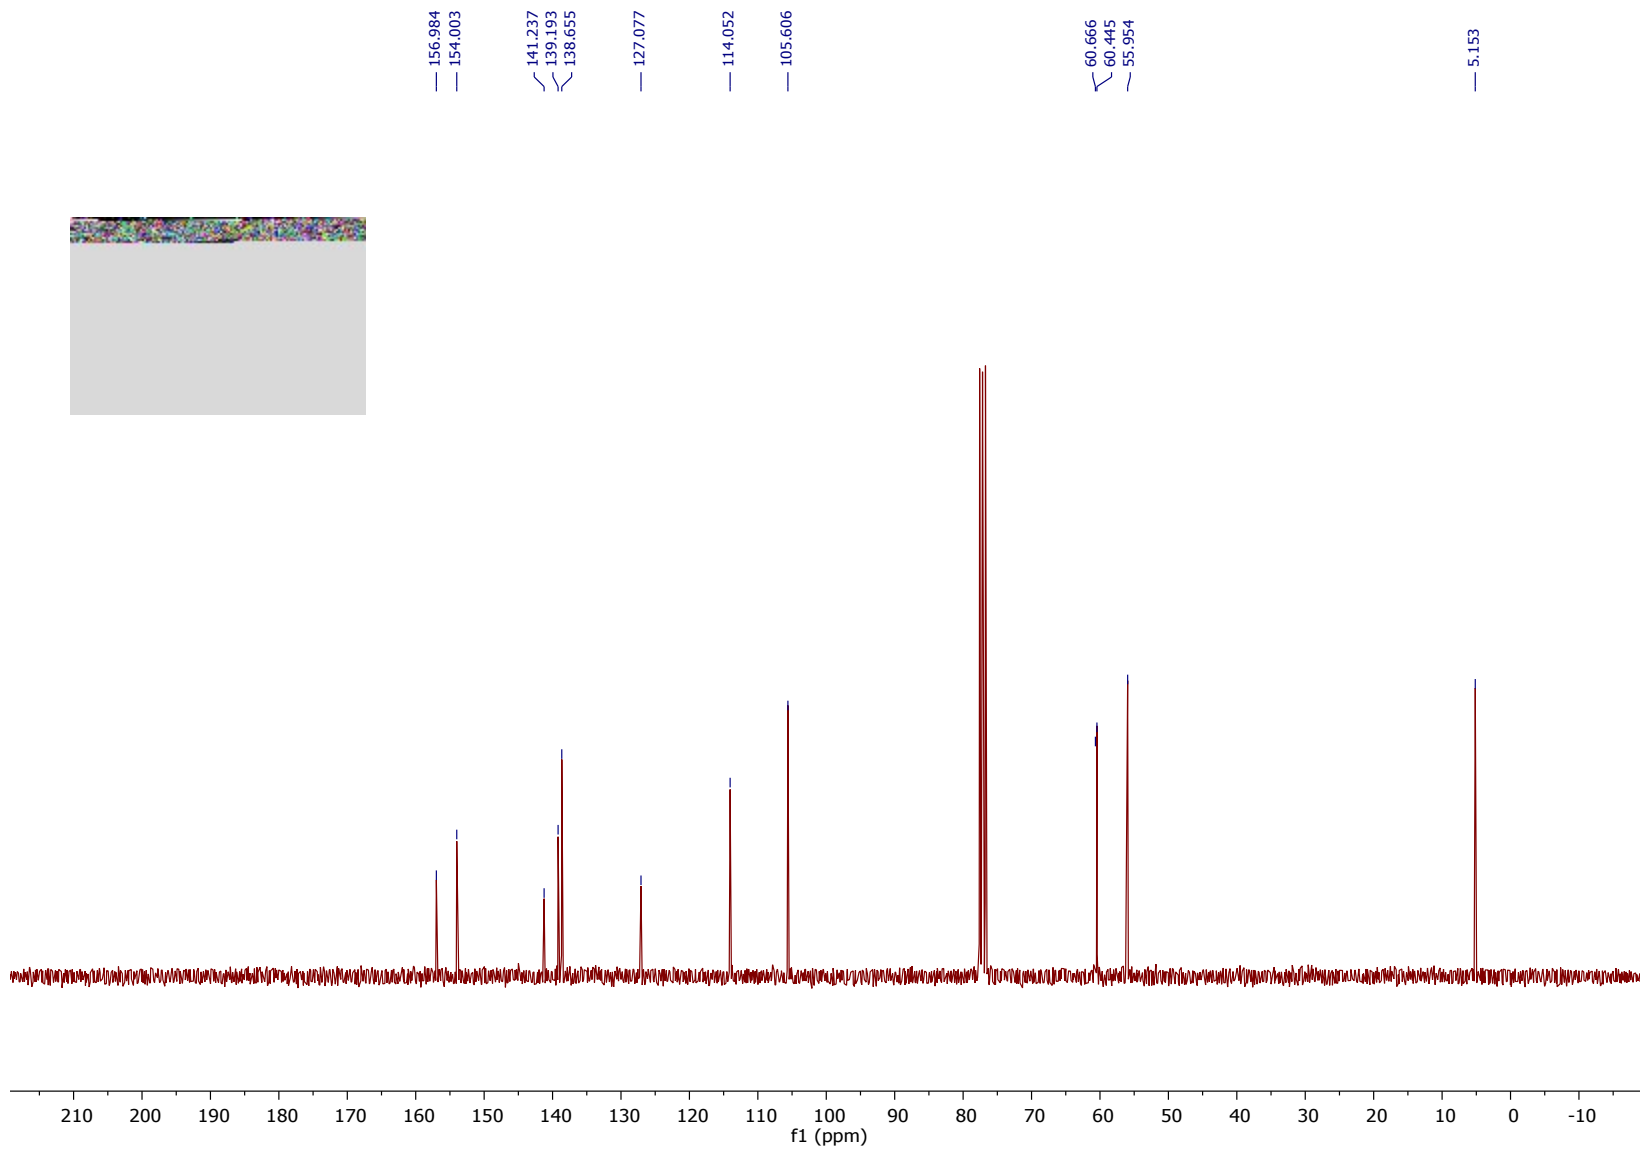

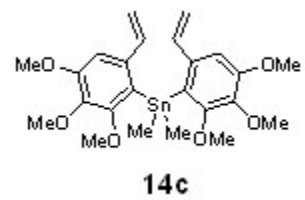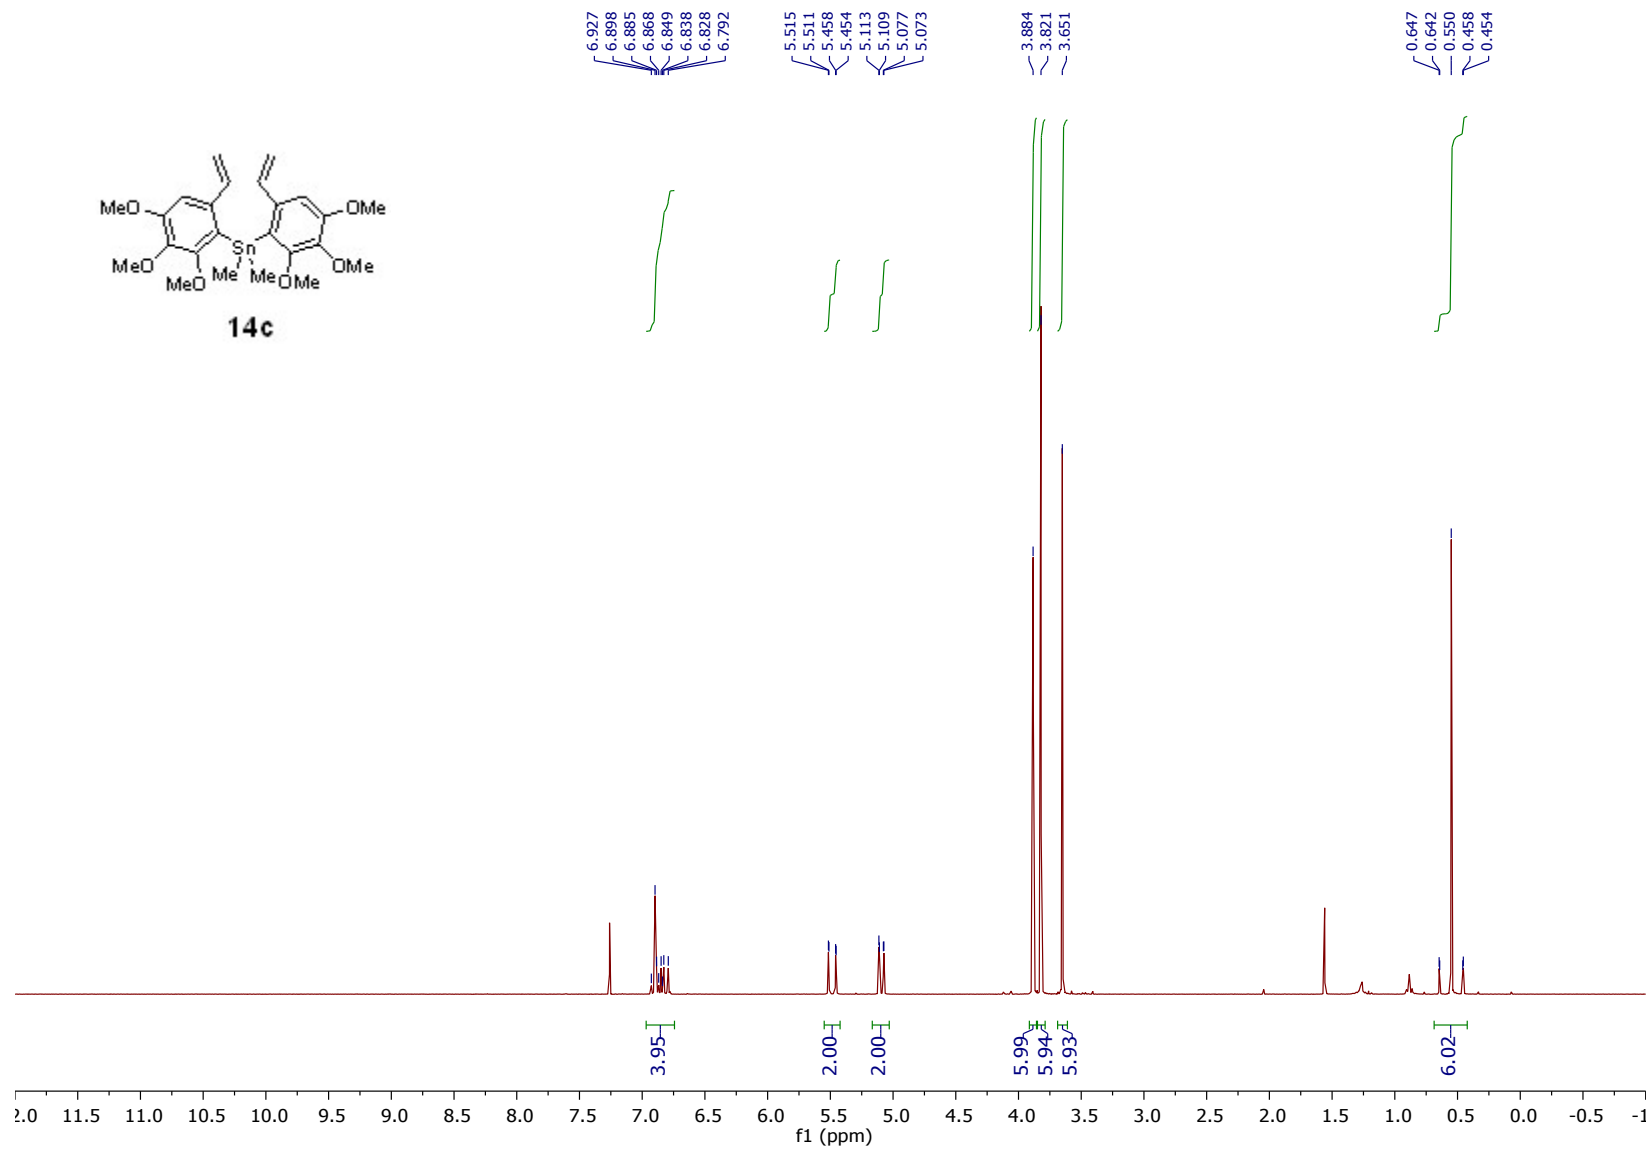

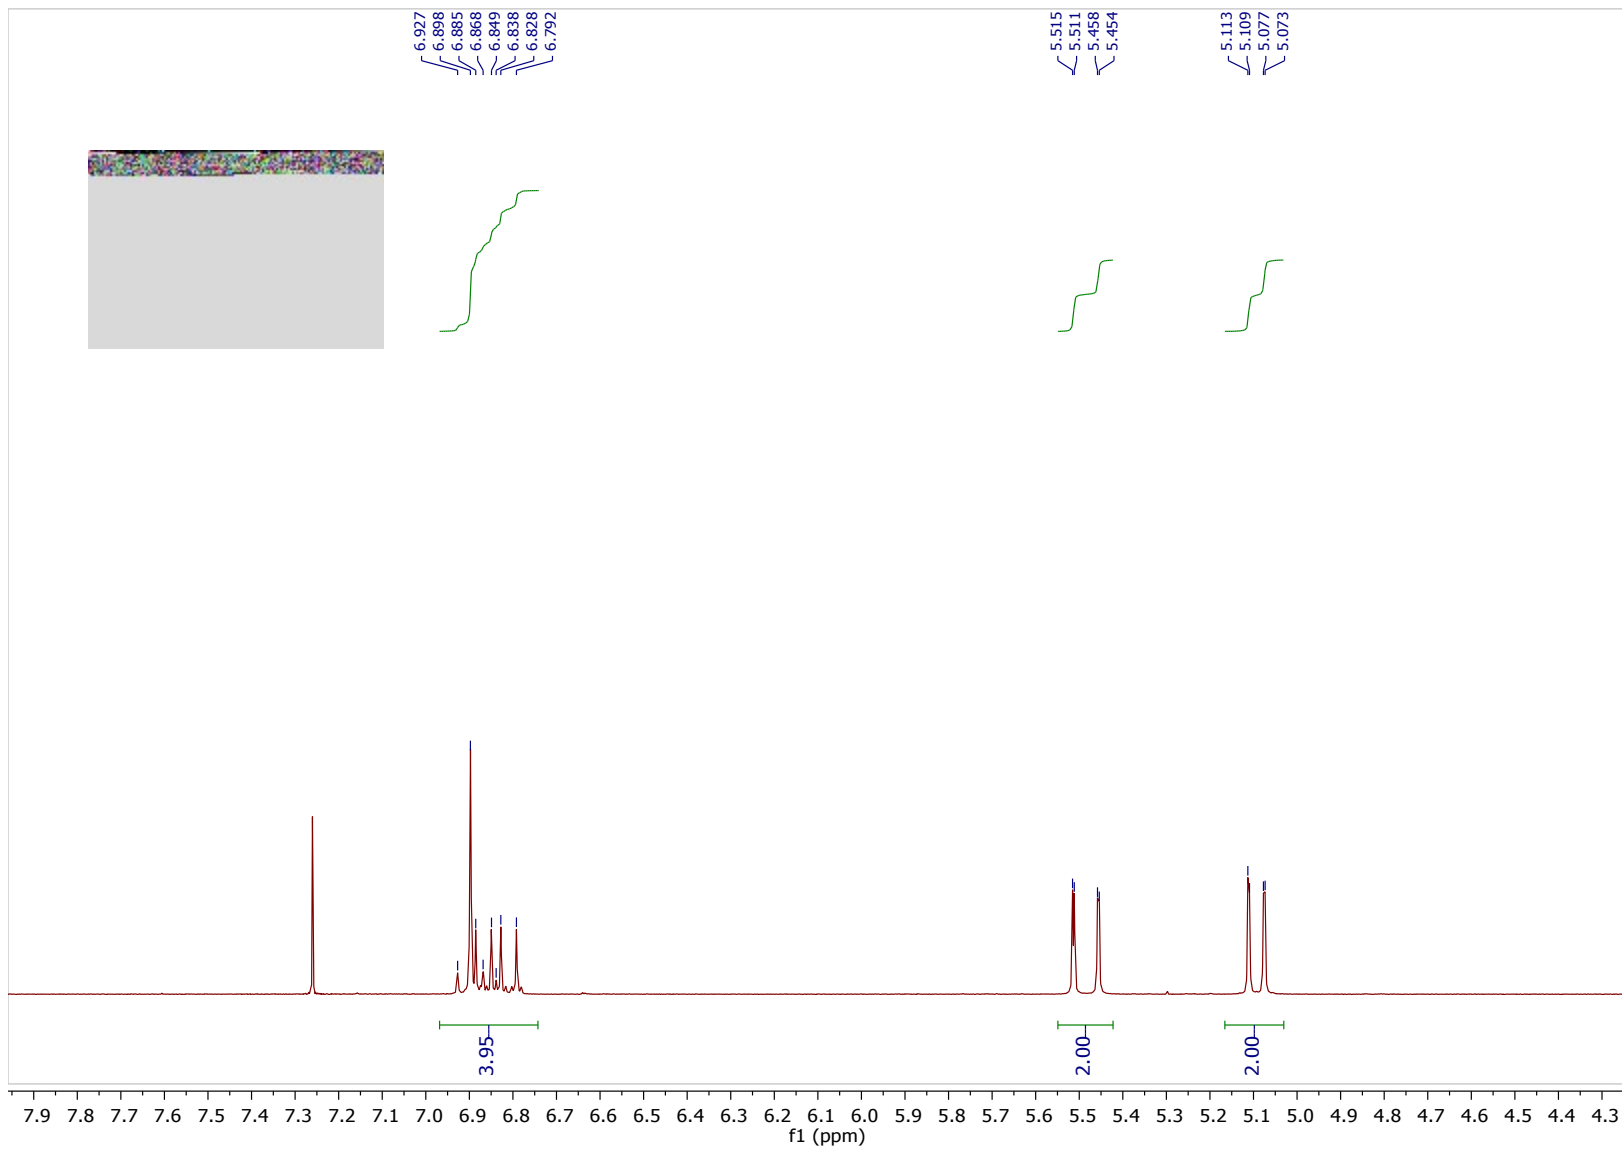

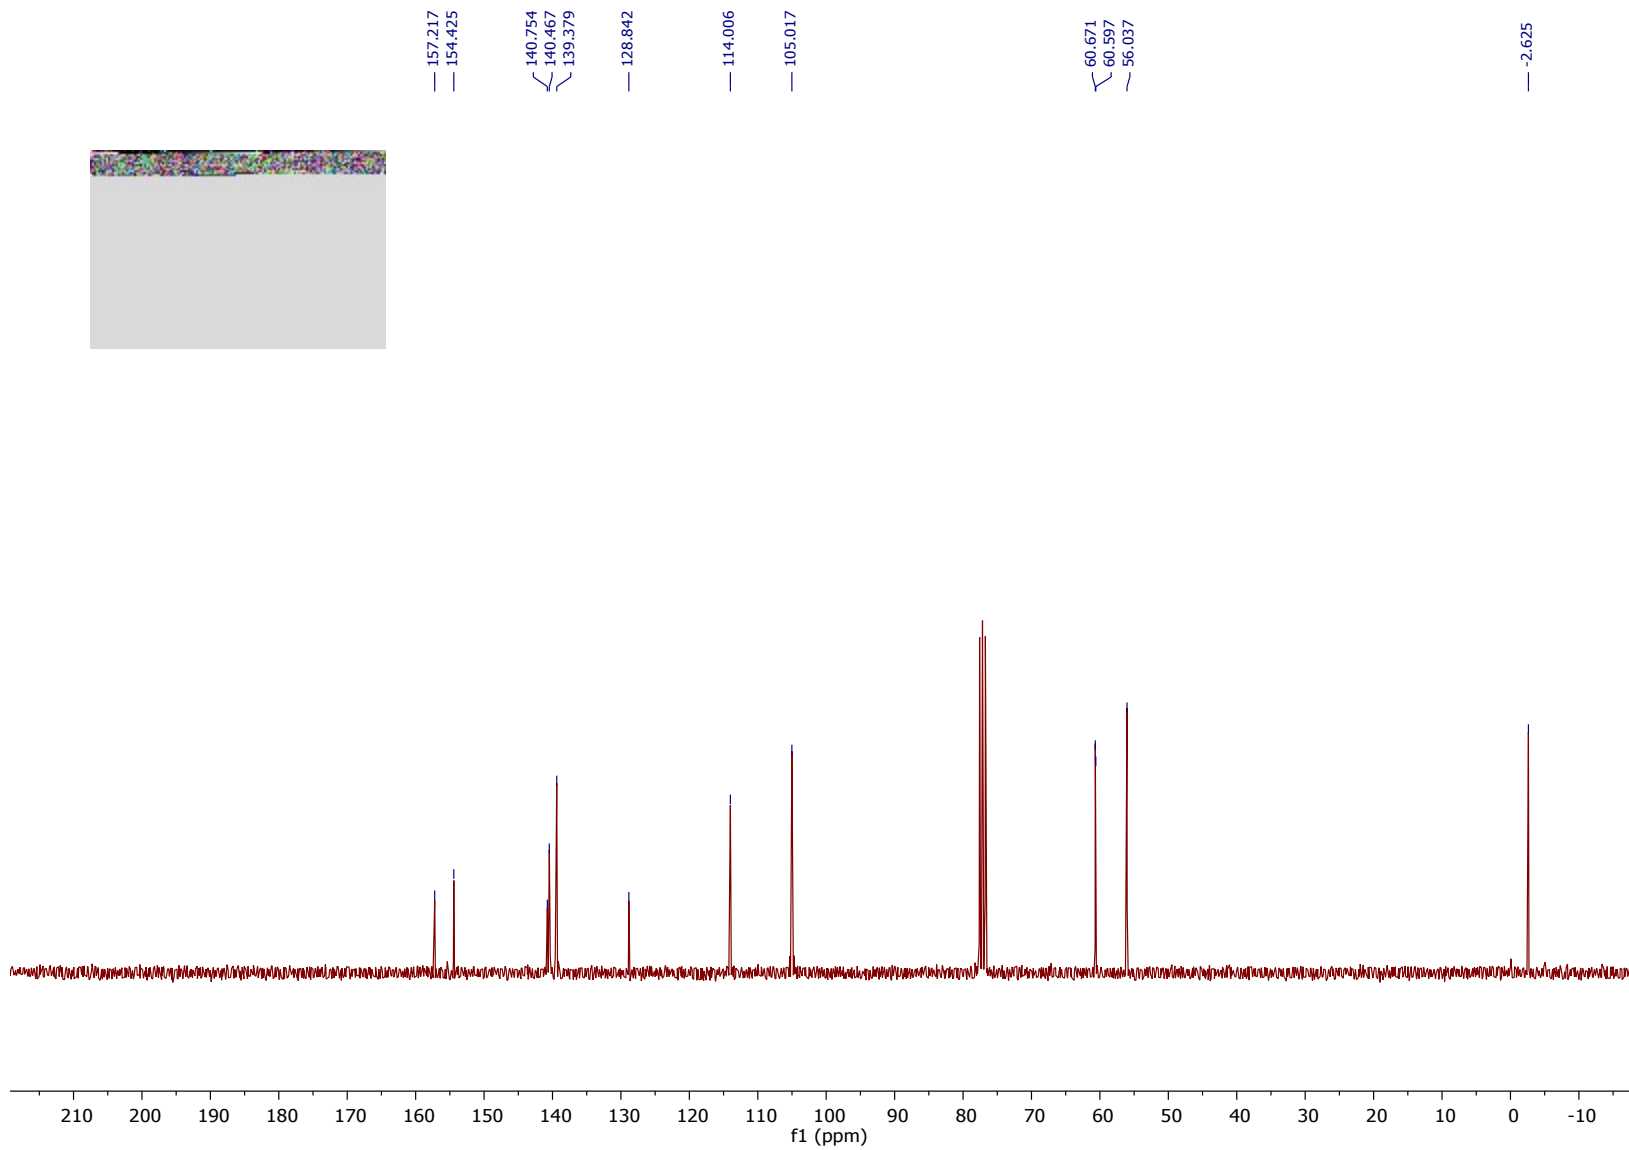

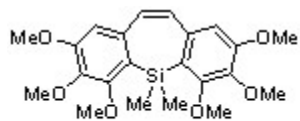

15a

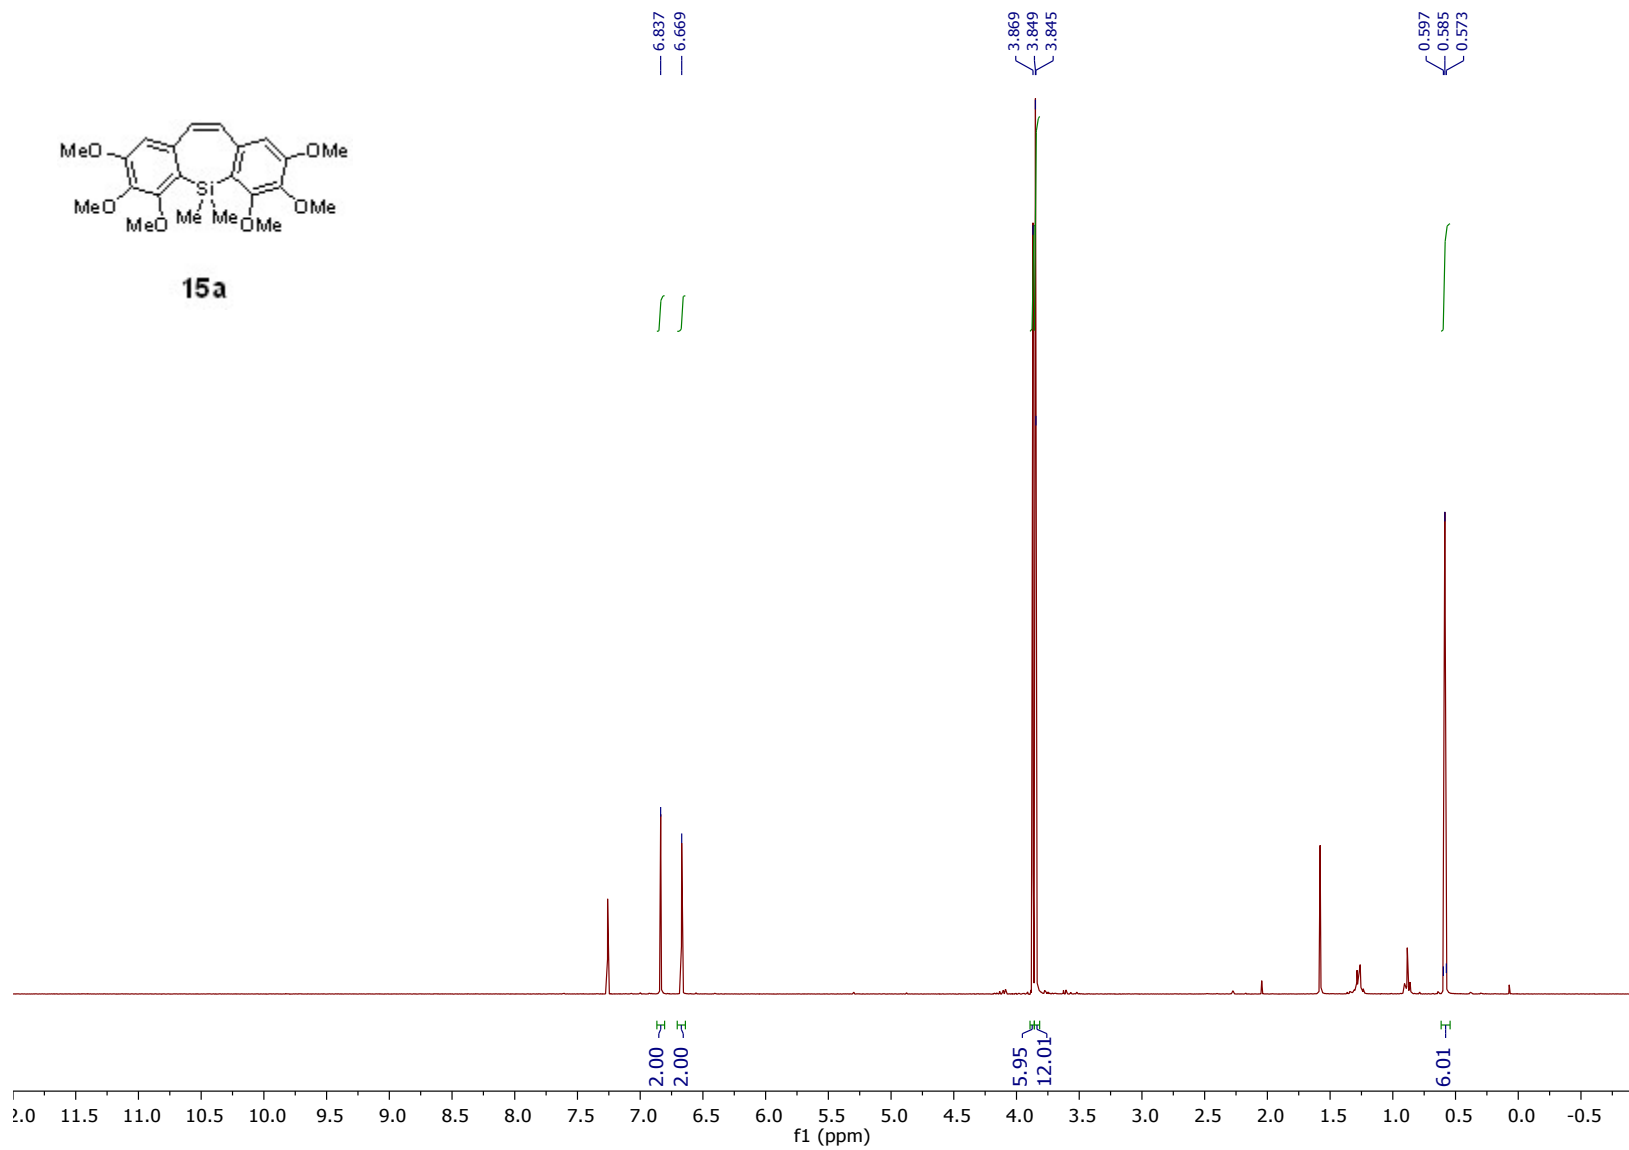

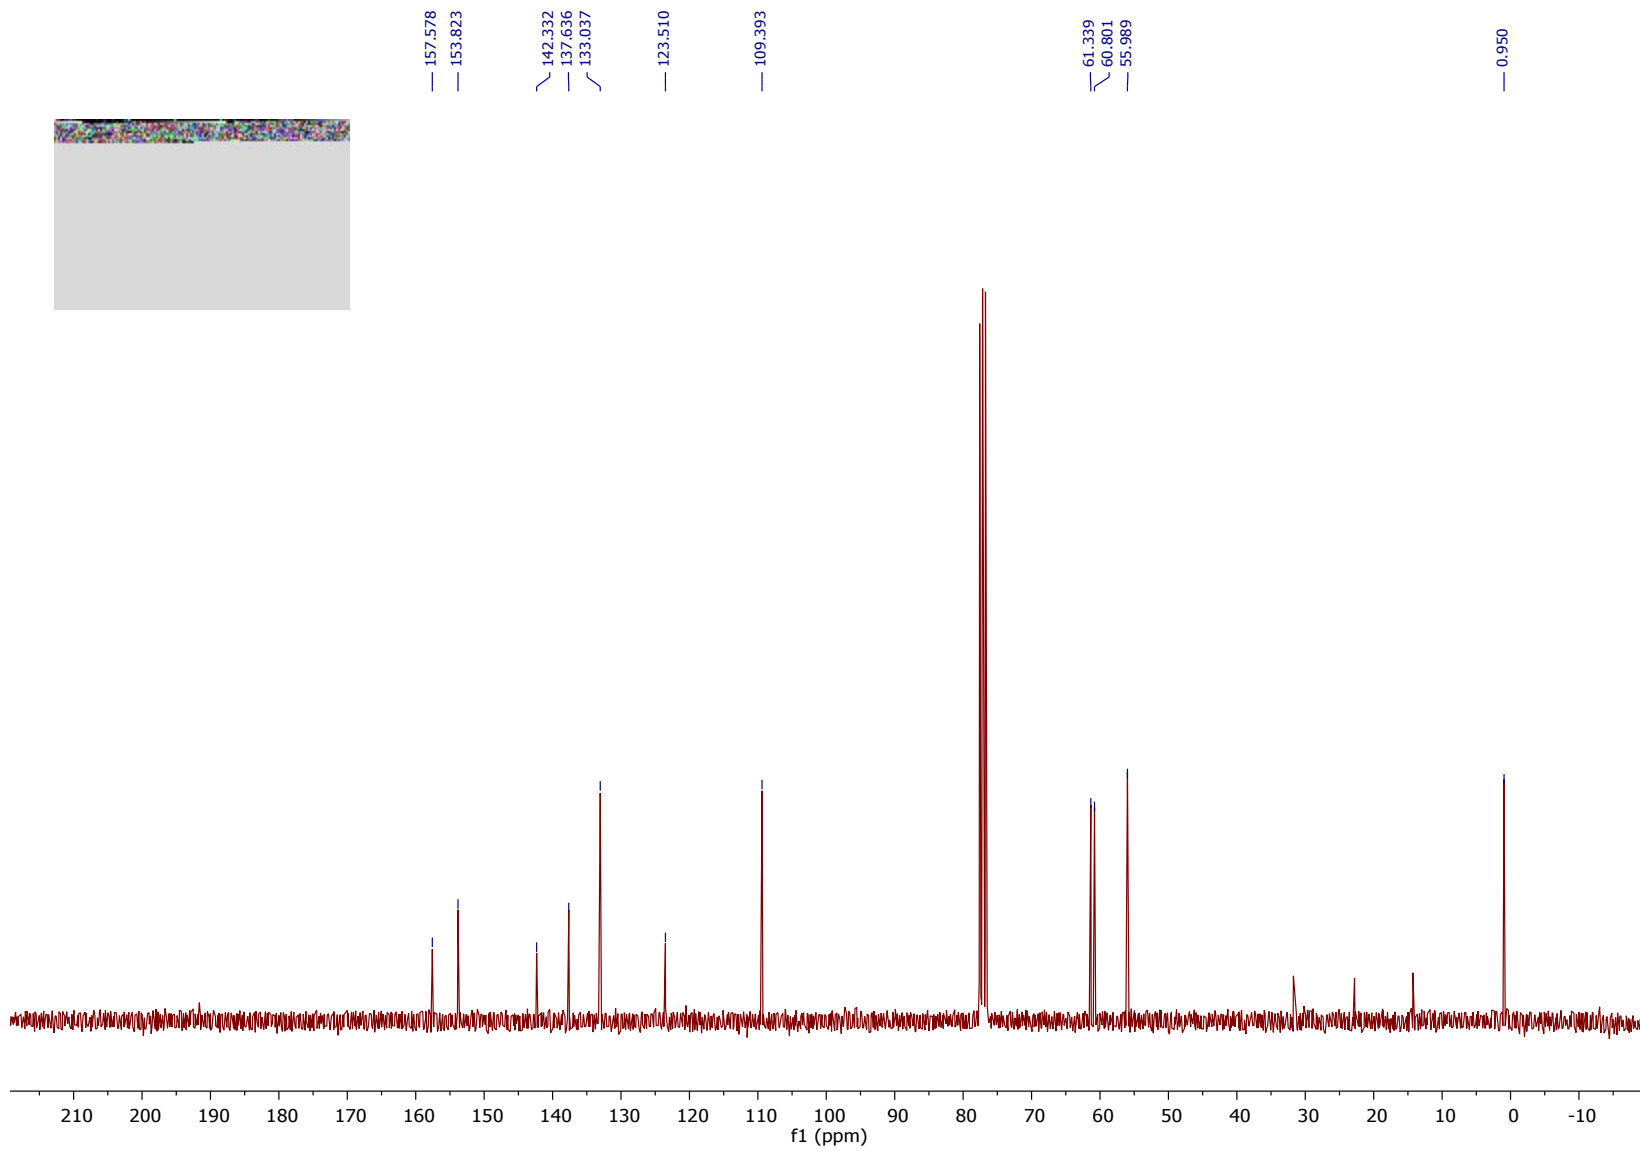

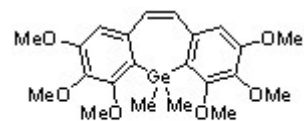

15b

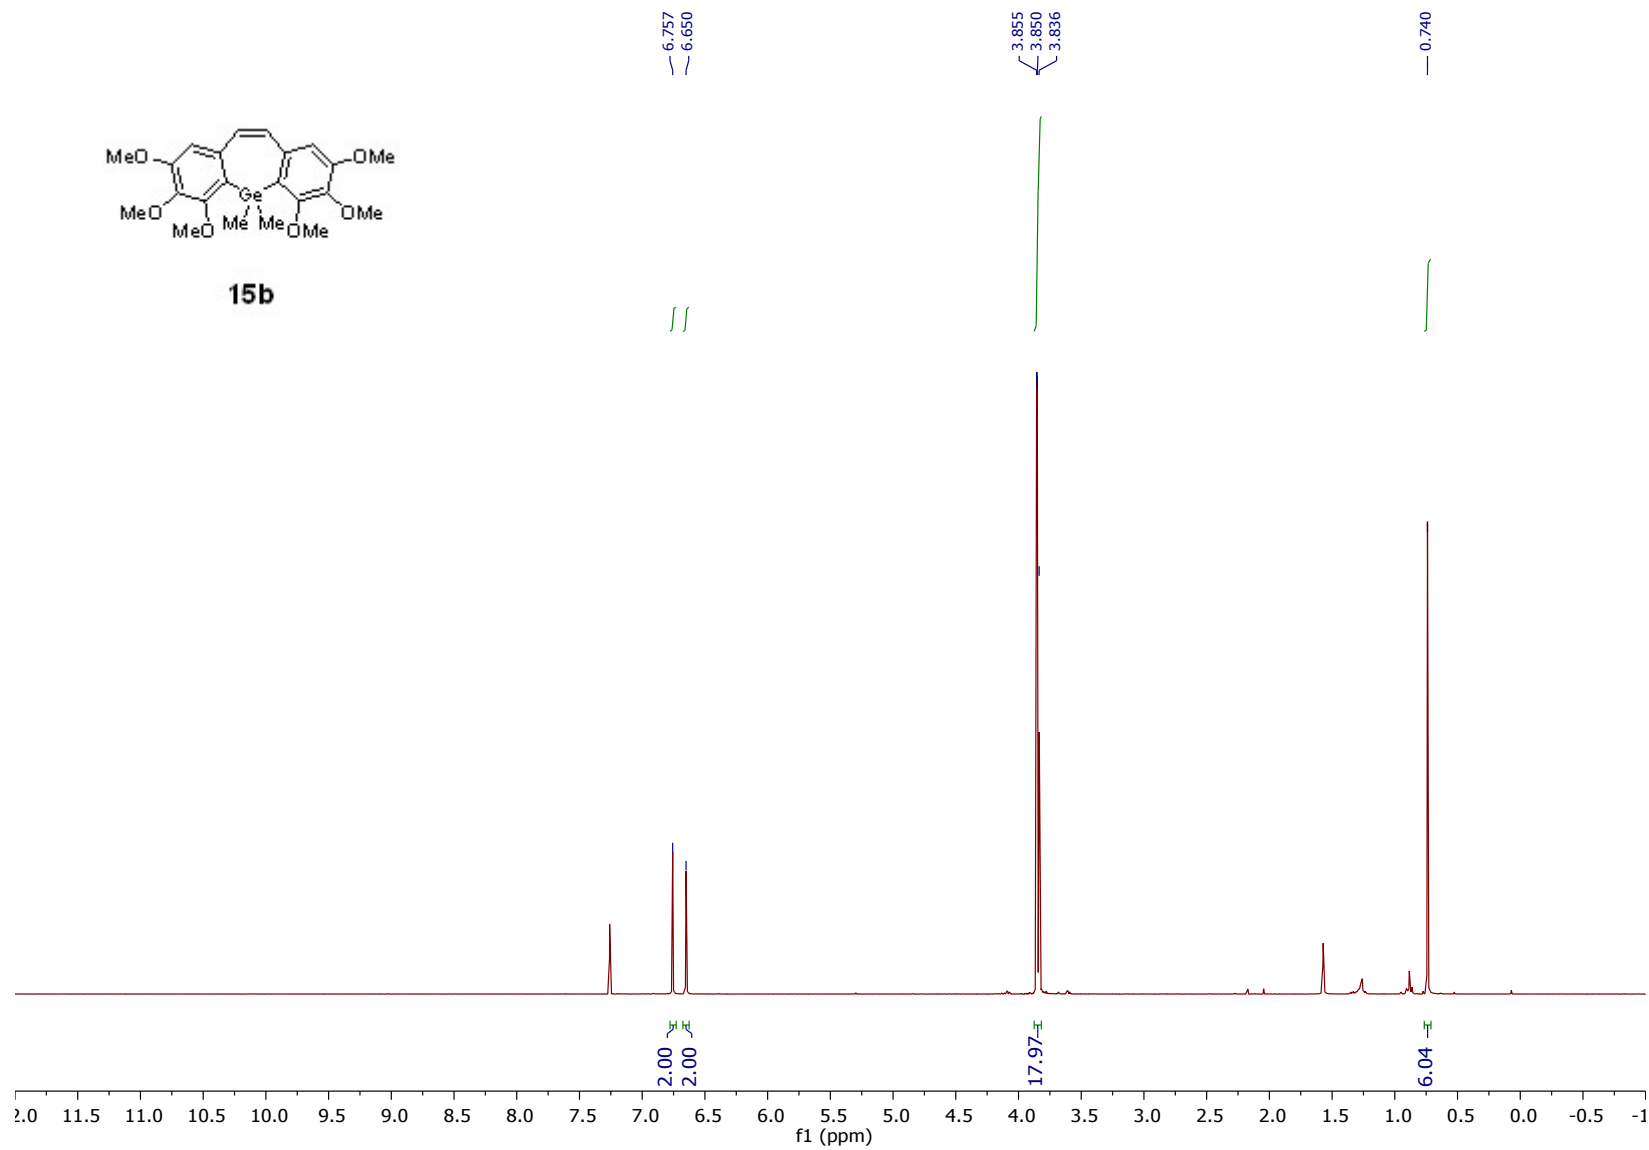



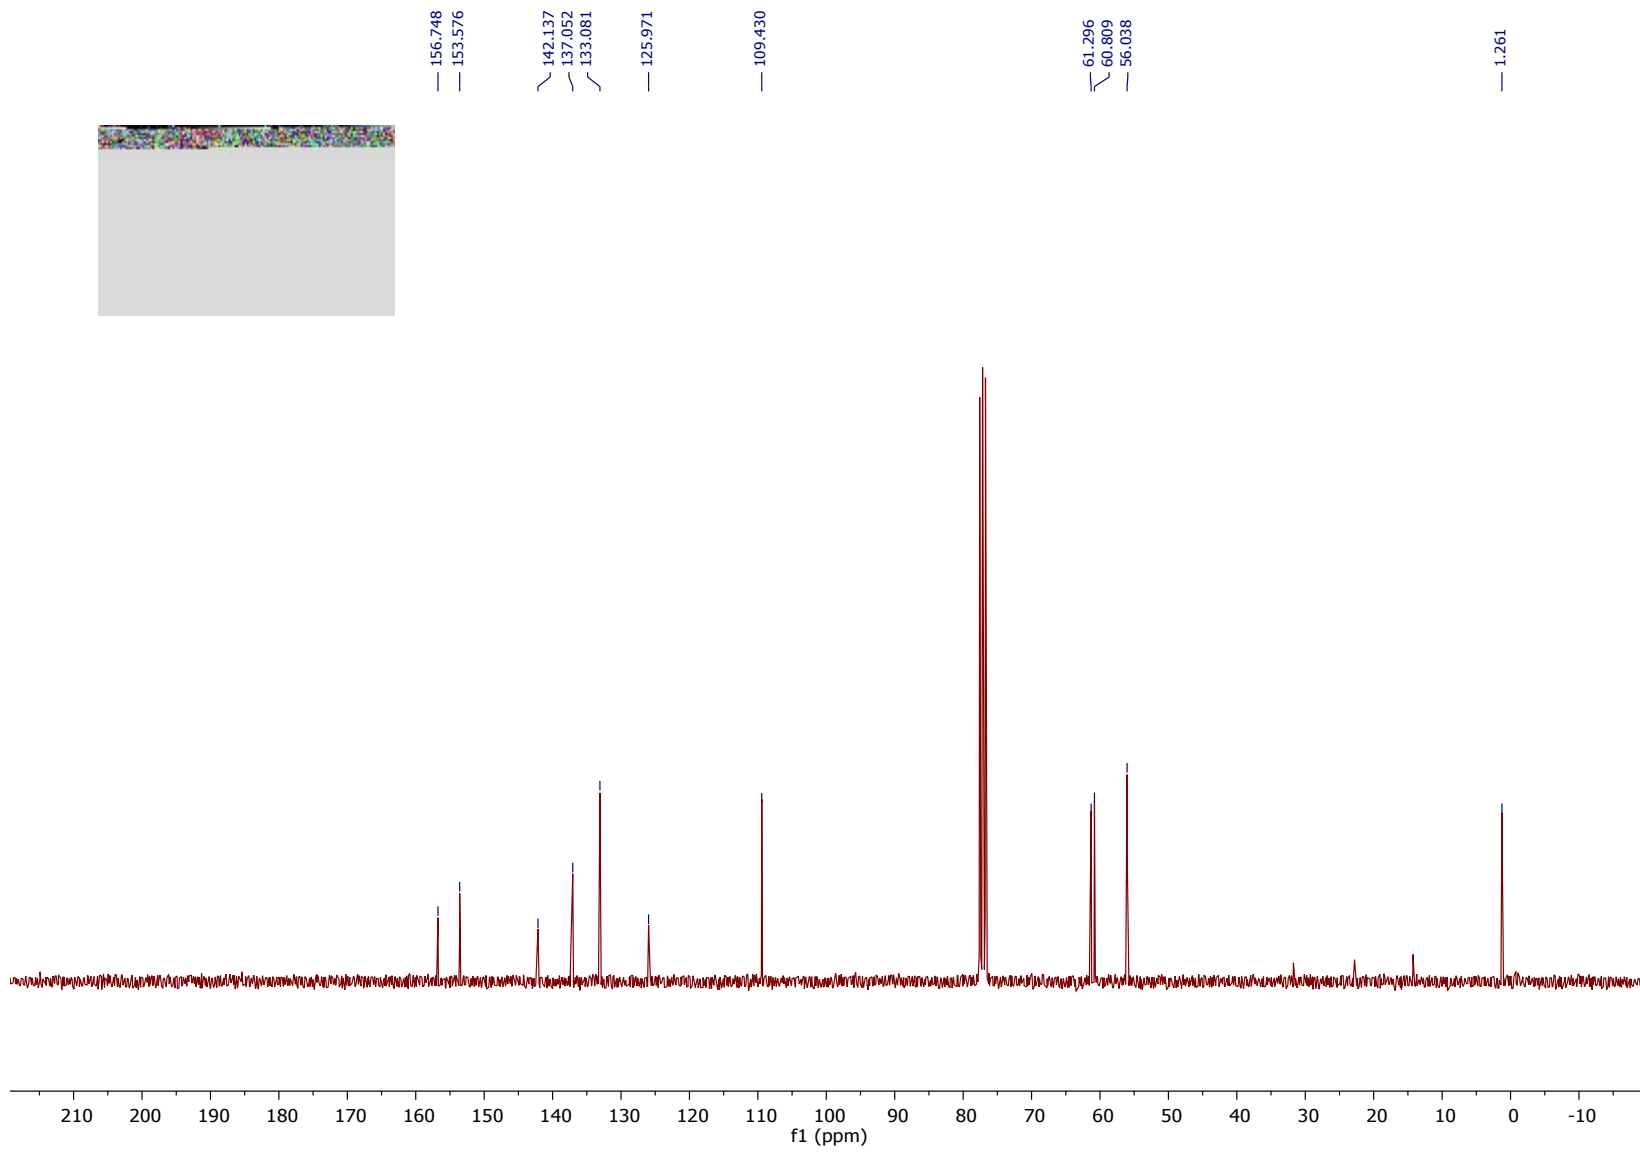



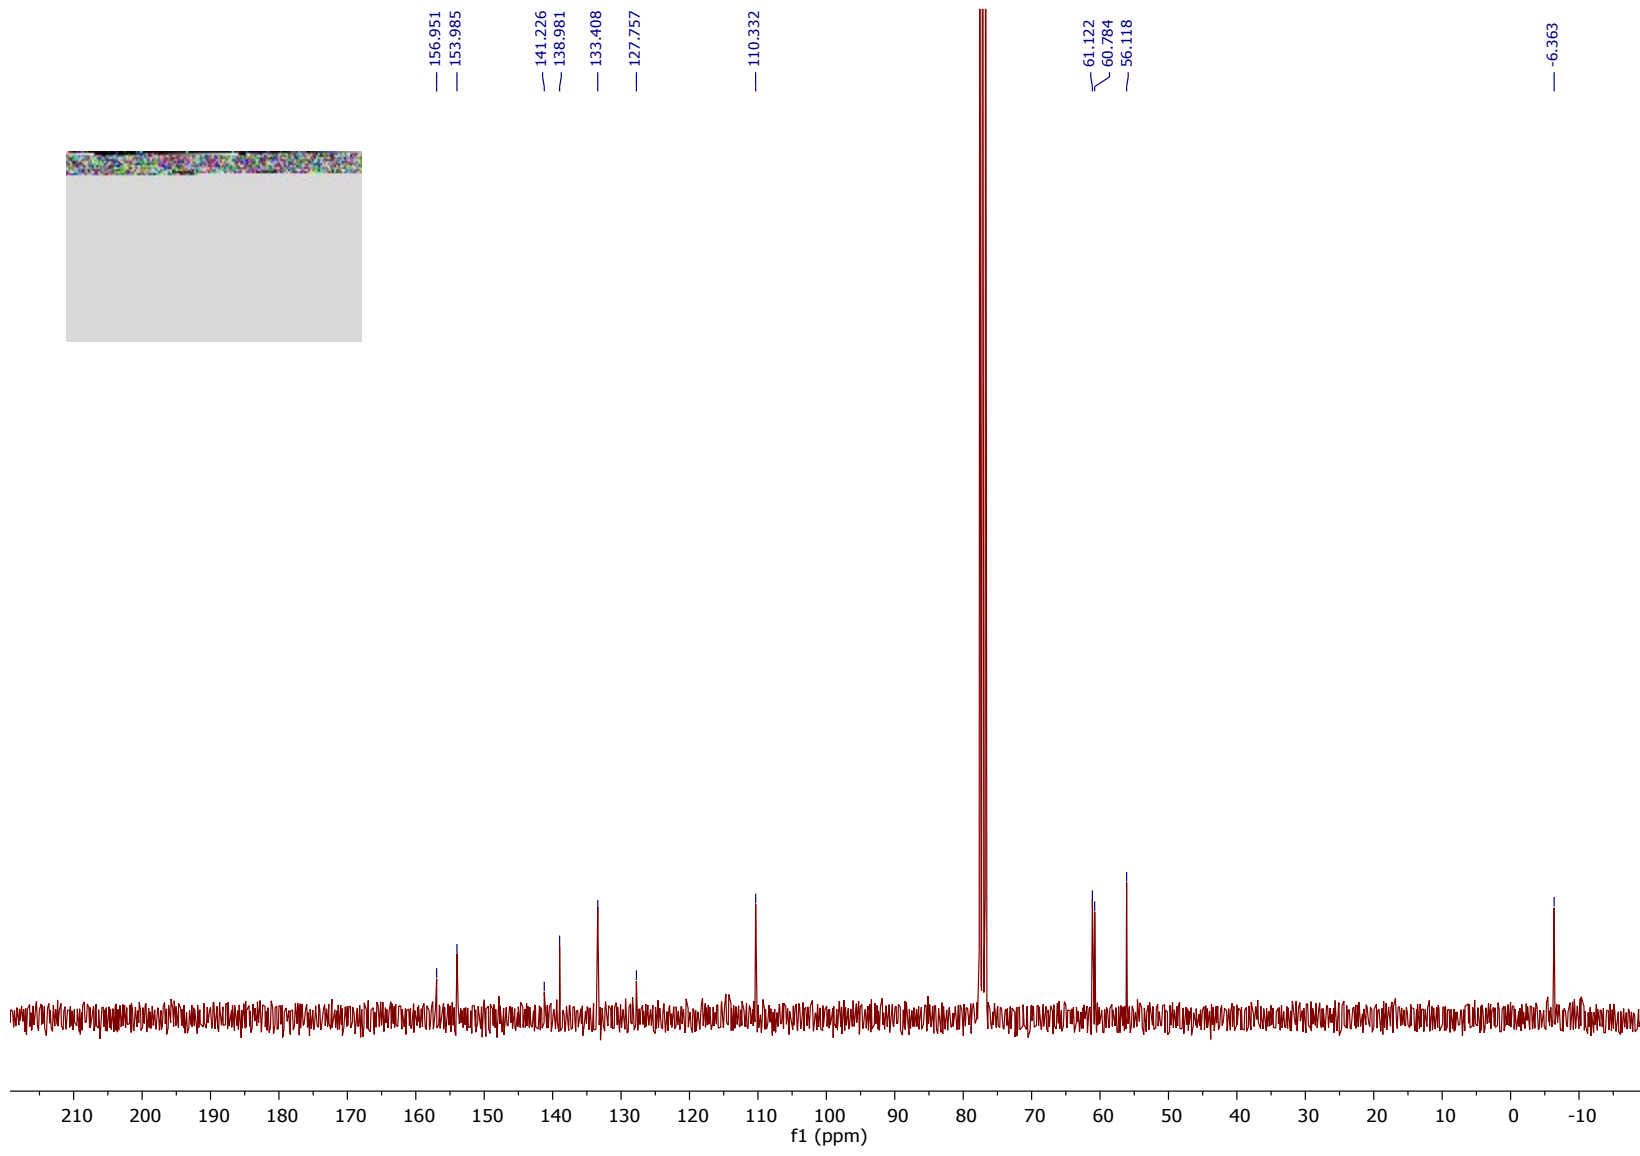

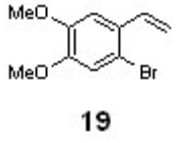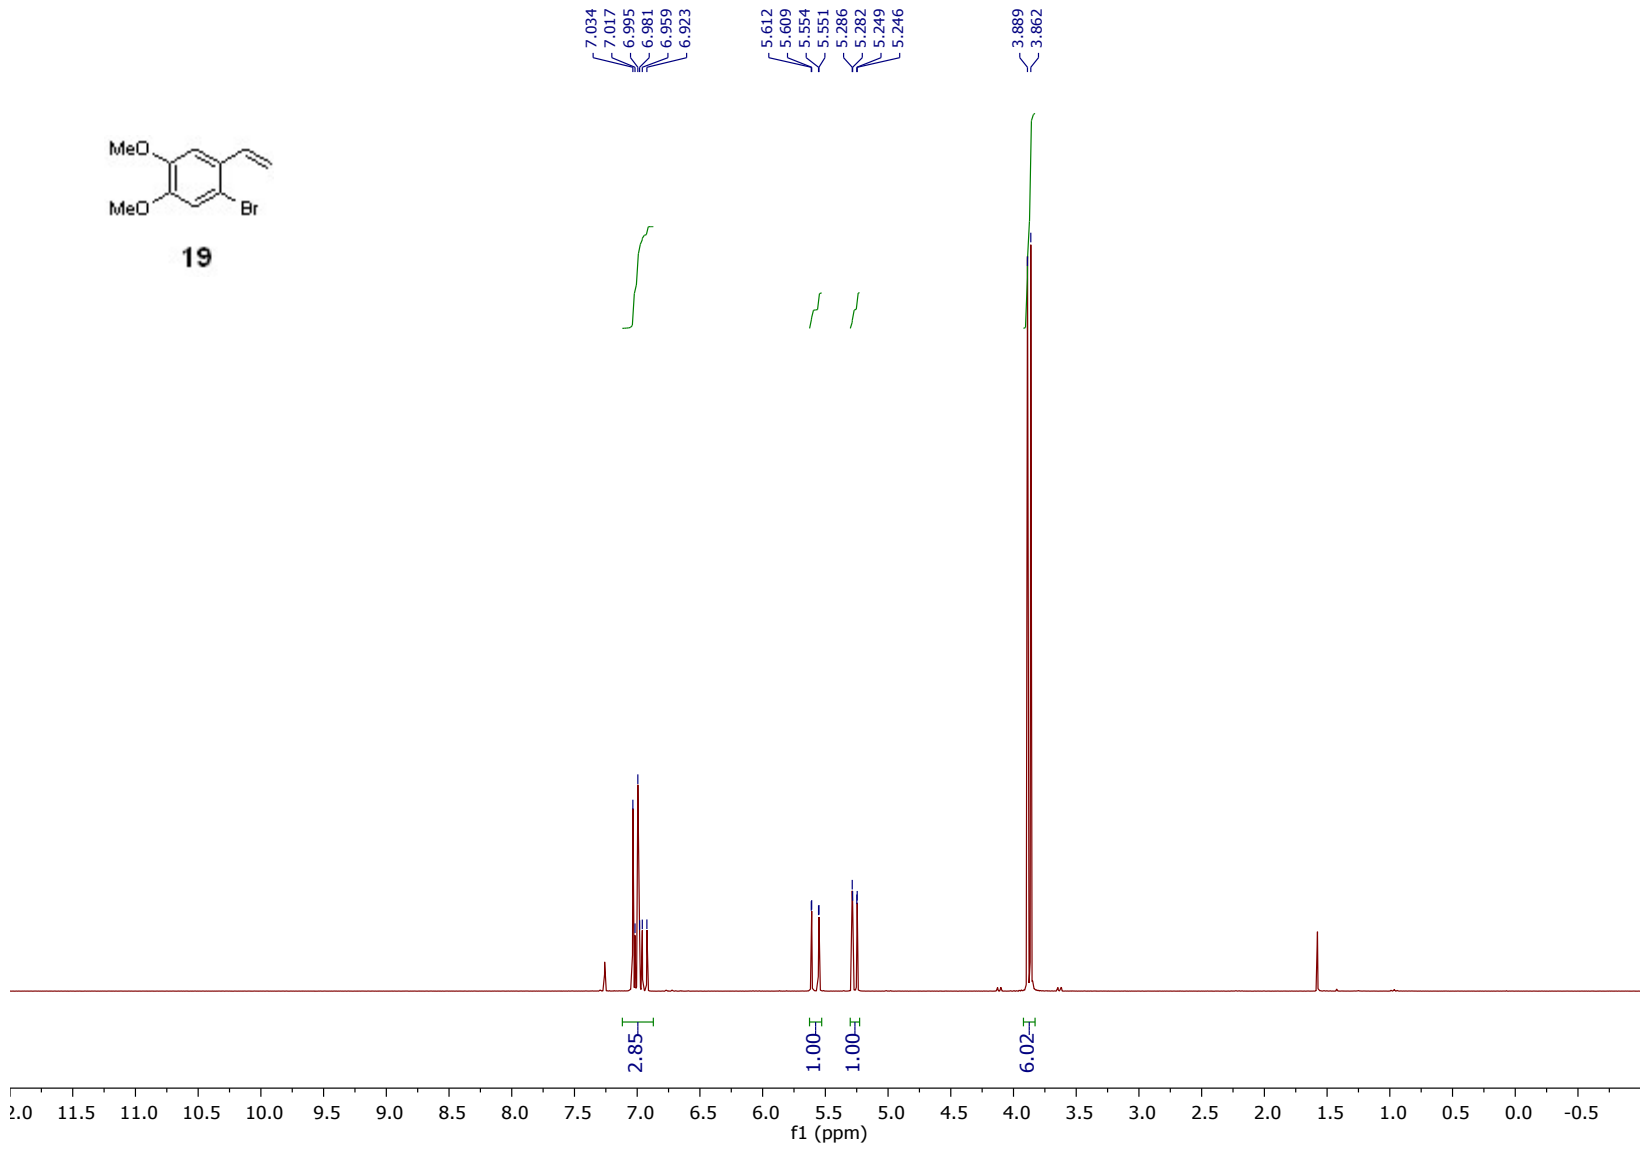

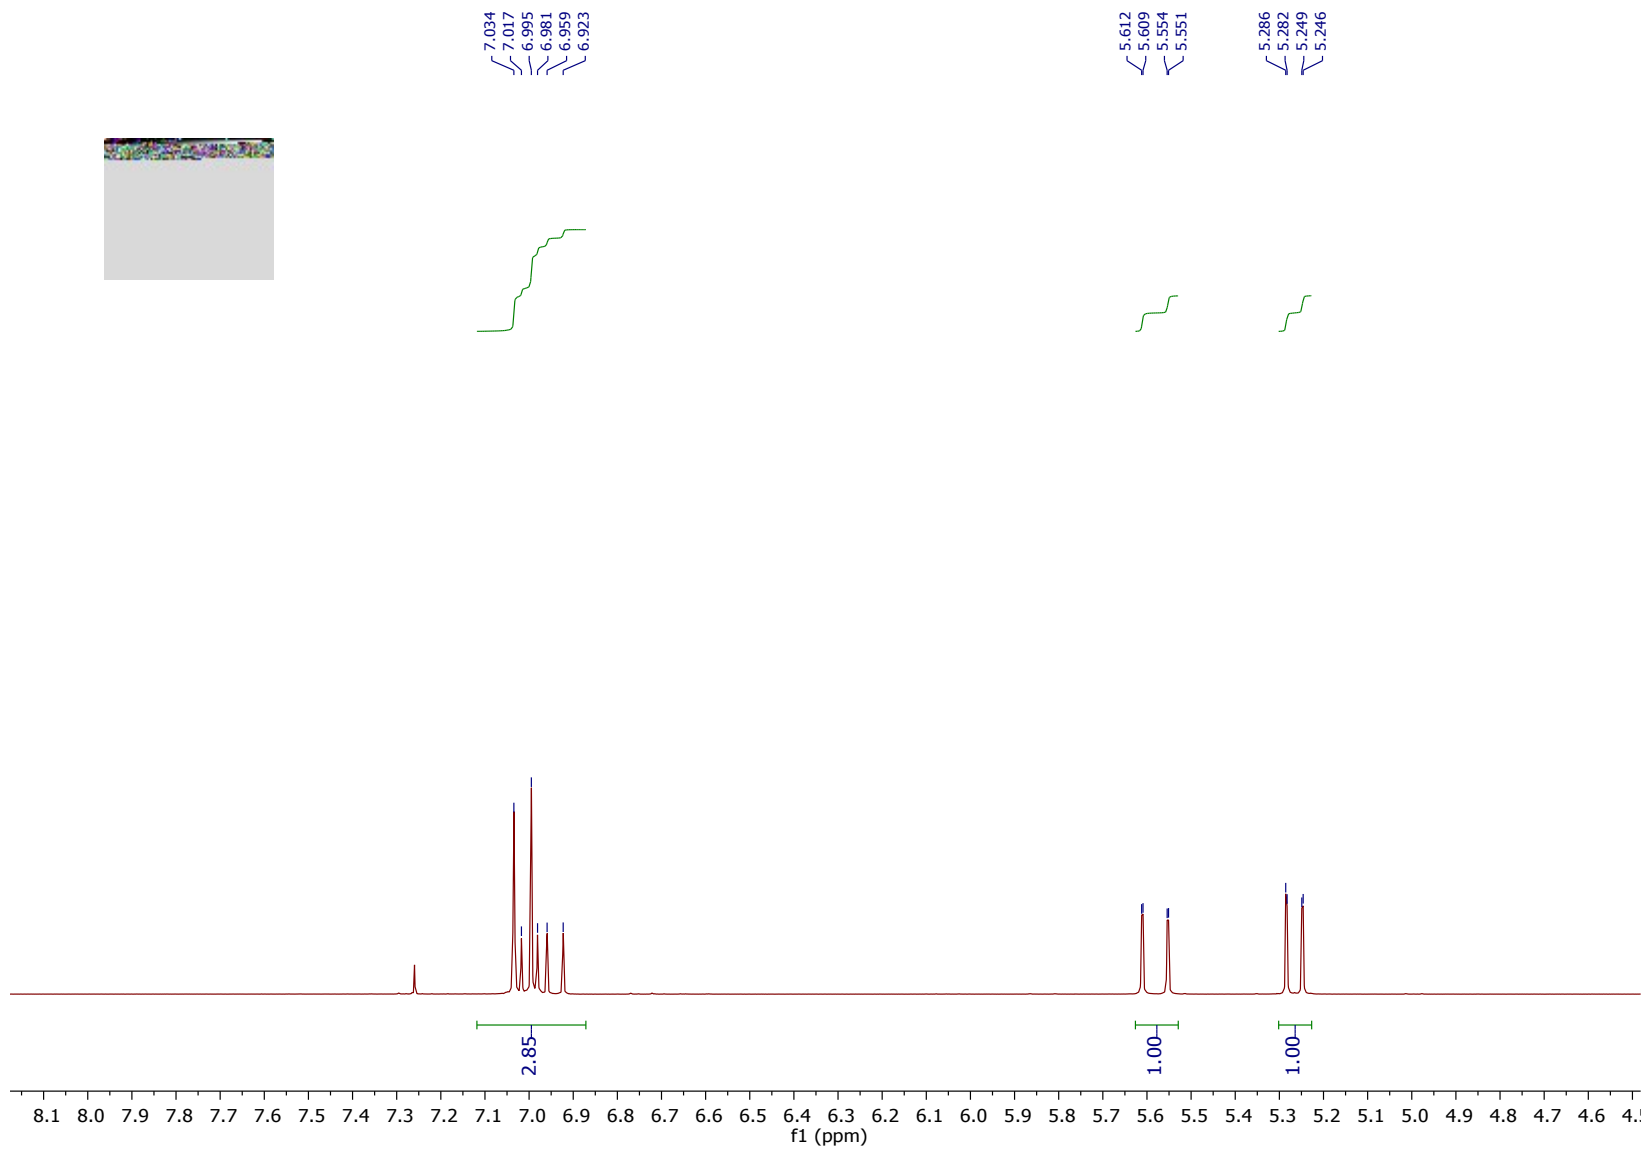

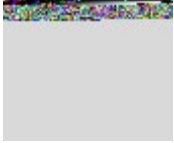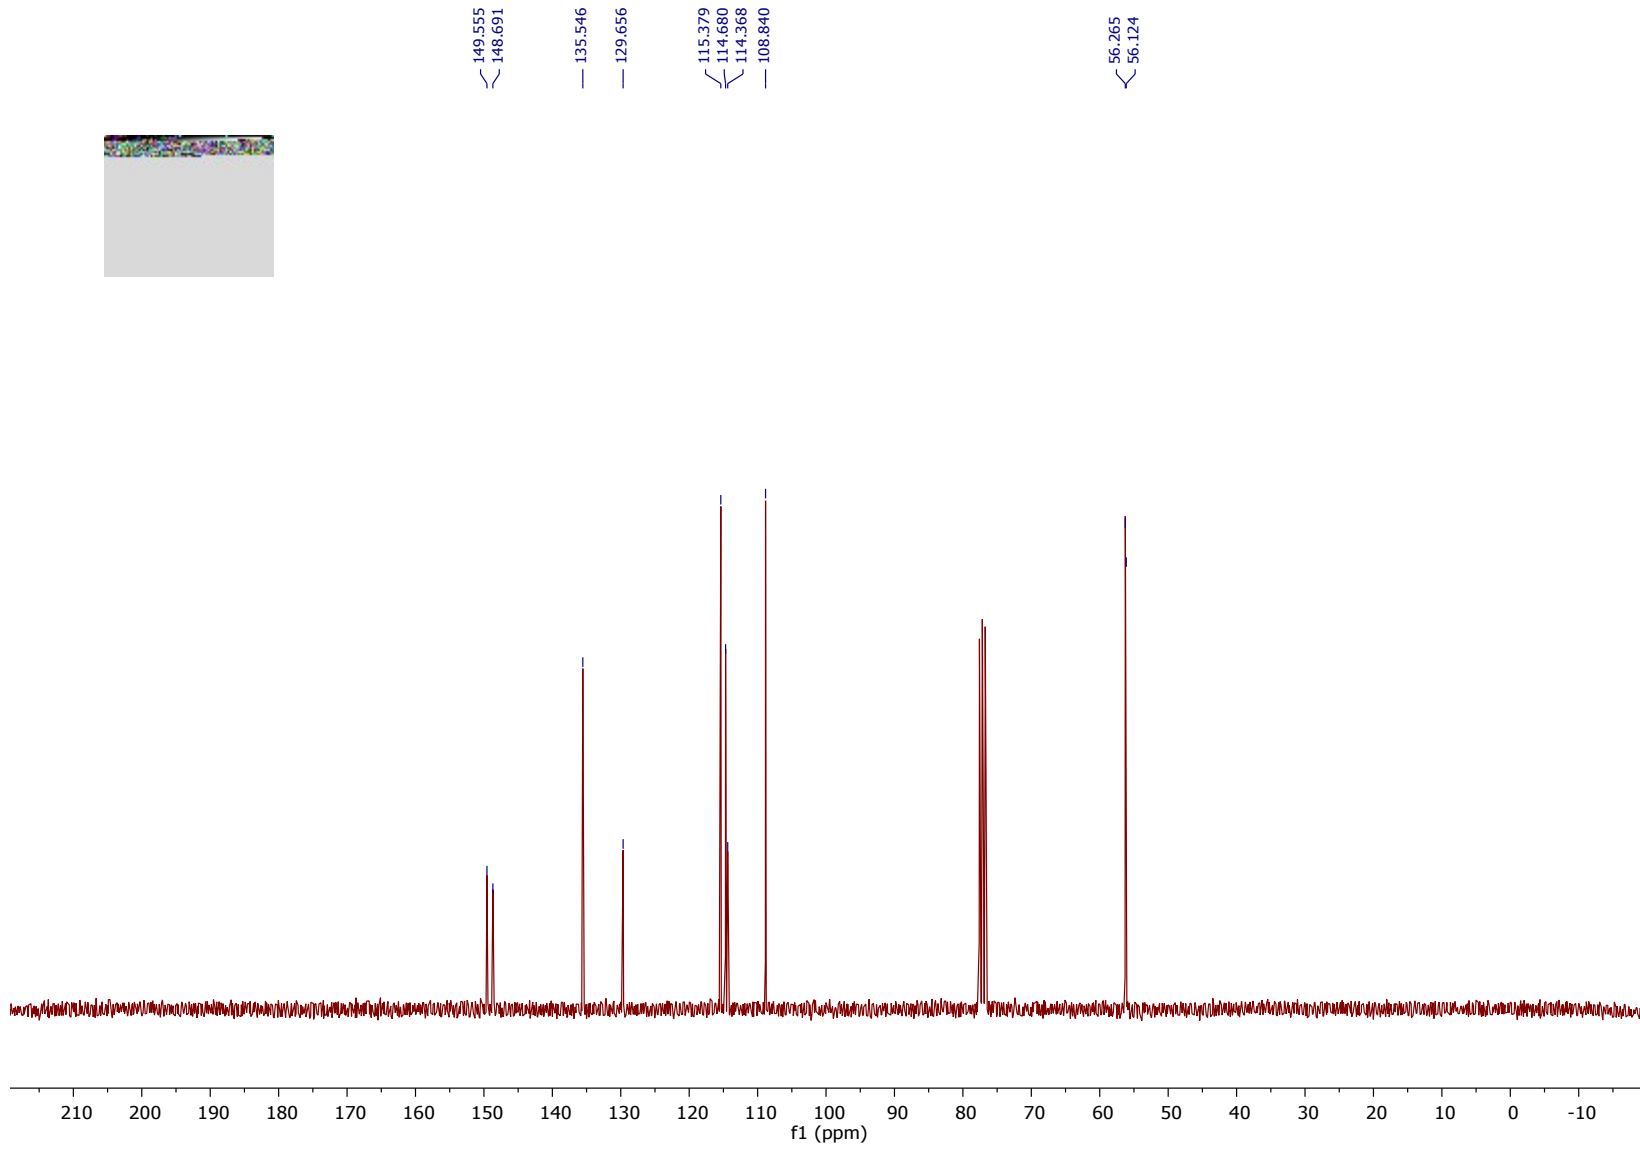

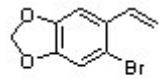

20

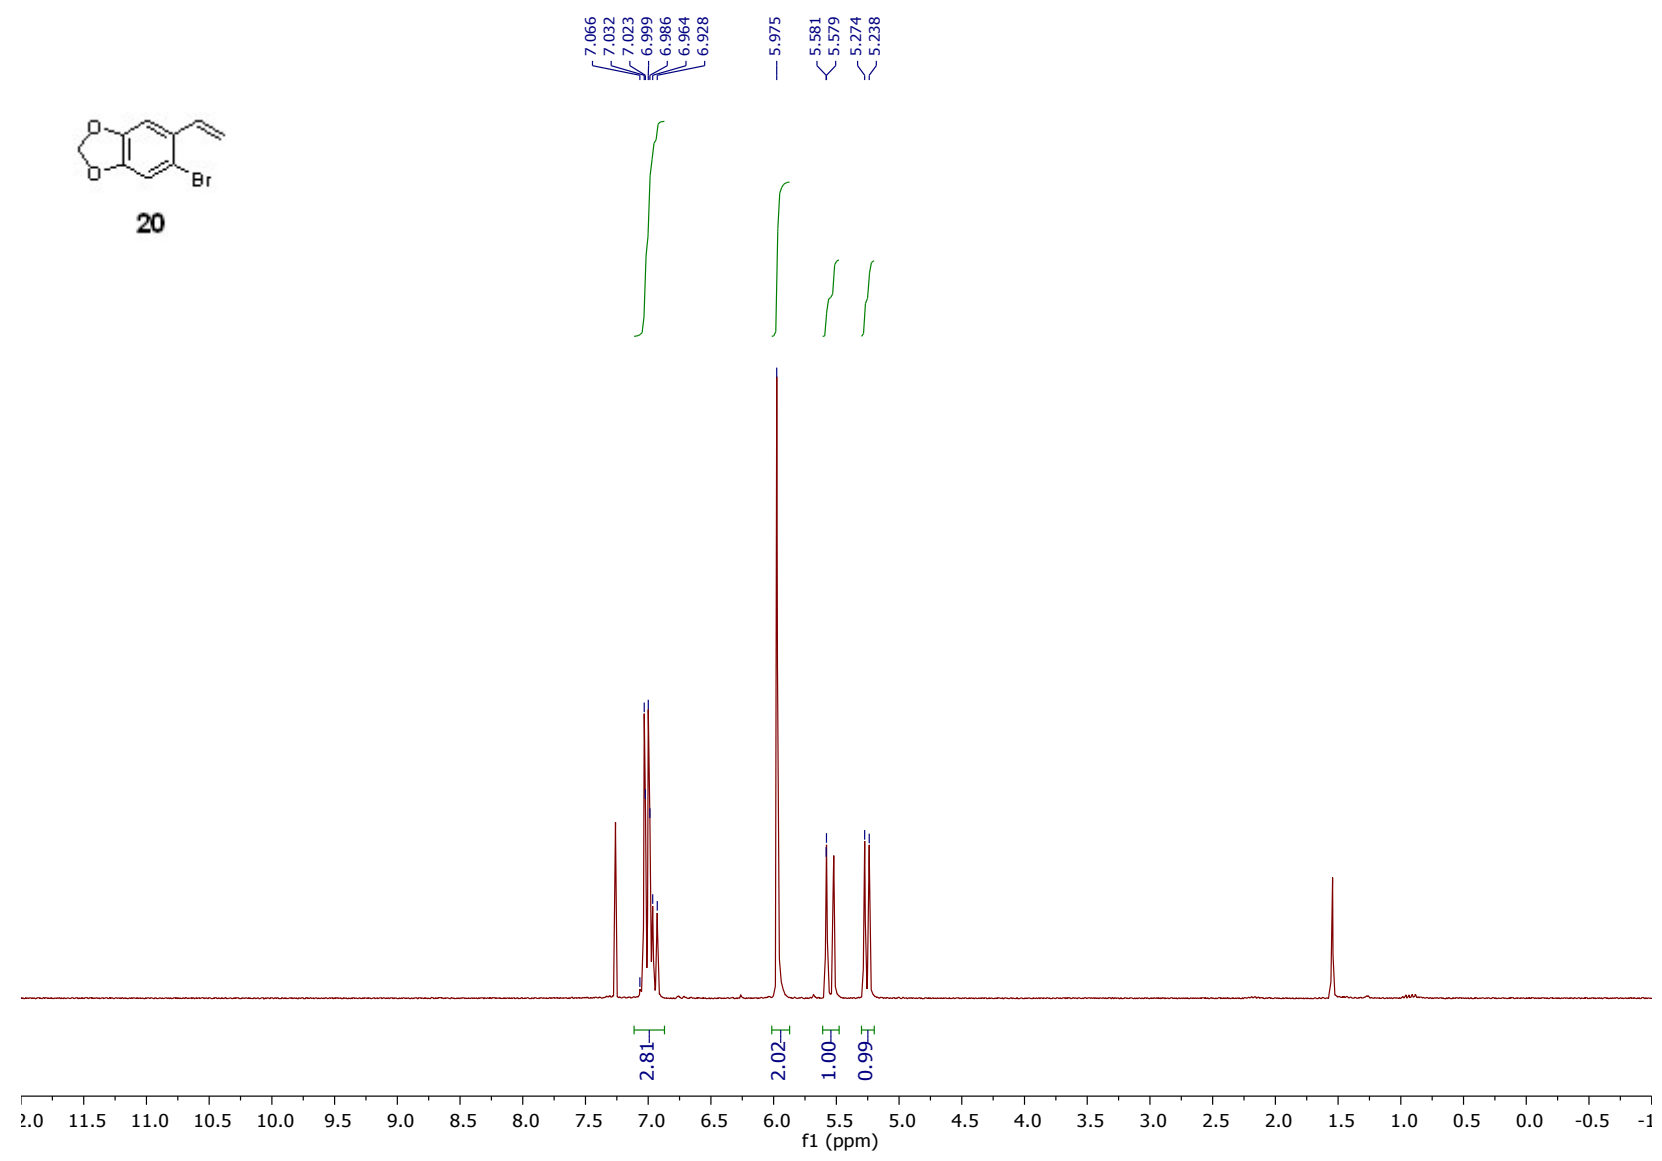

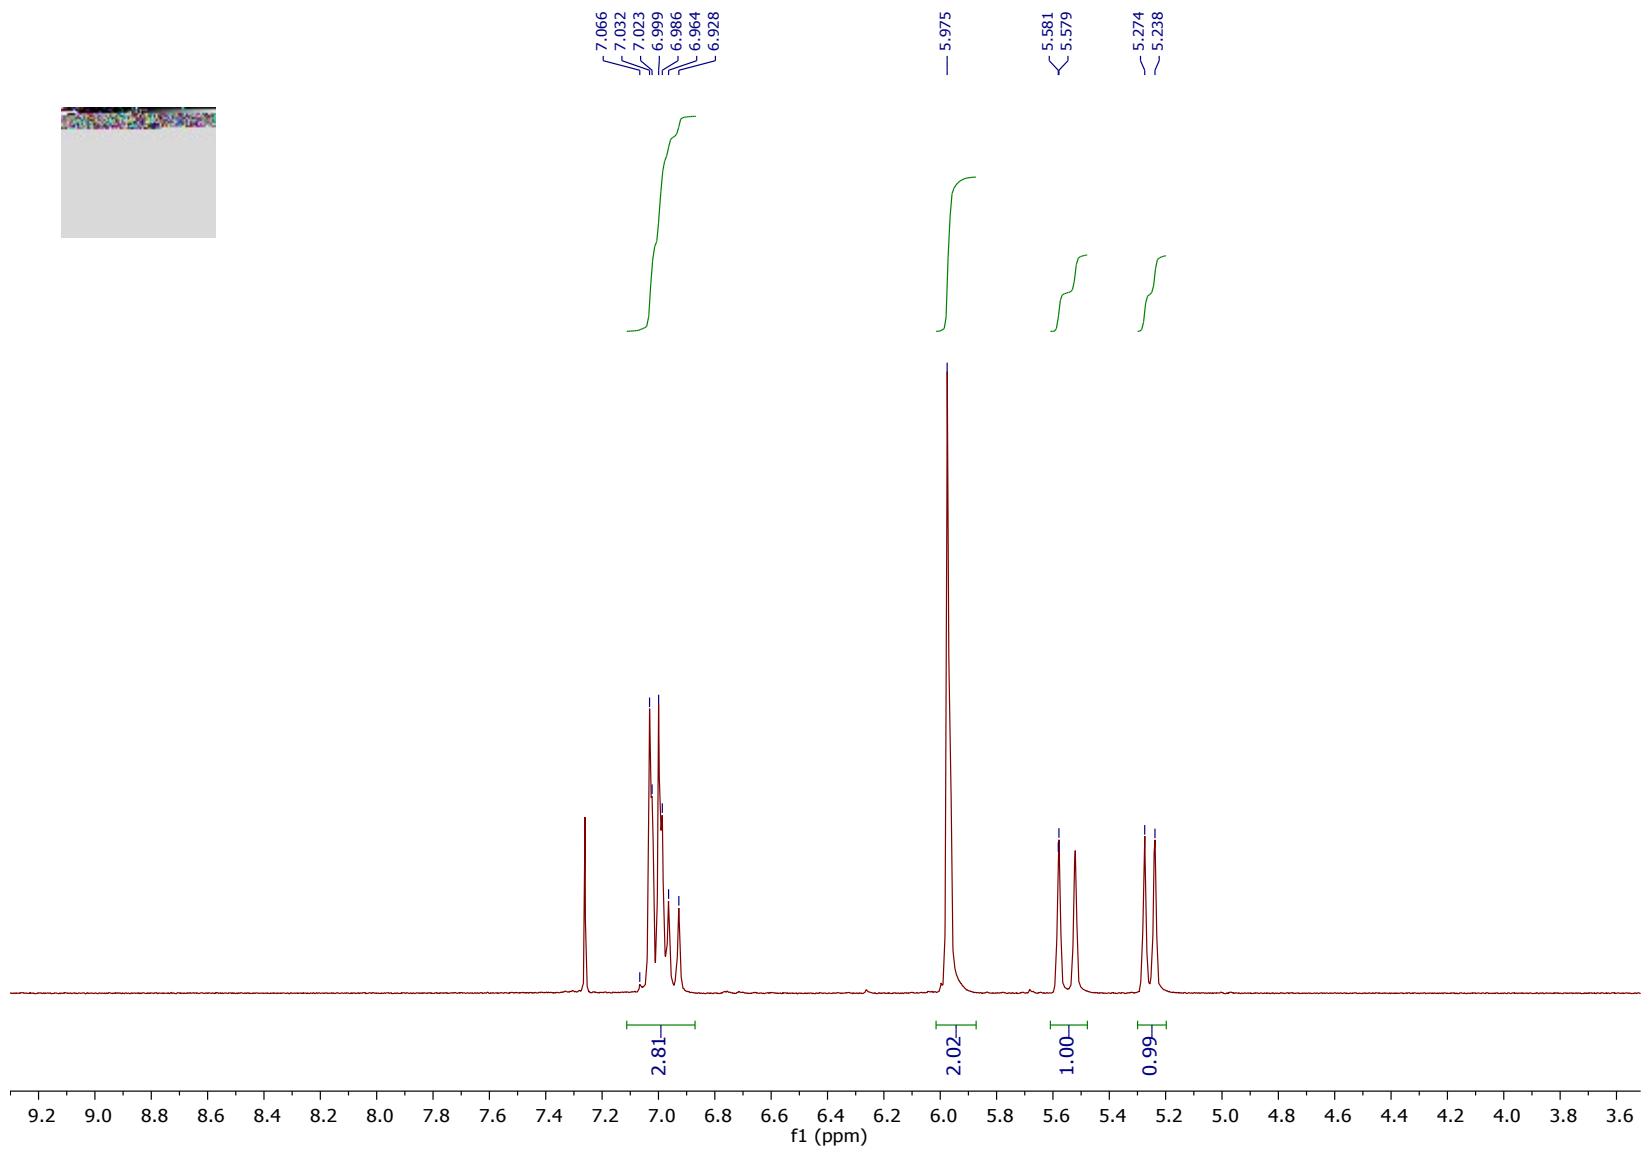



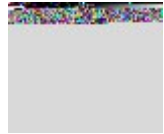

148.221  
147.853  
135.597  
131.011  
115.063  
114.838  
112.728  
106.083  
101.926

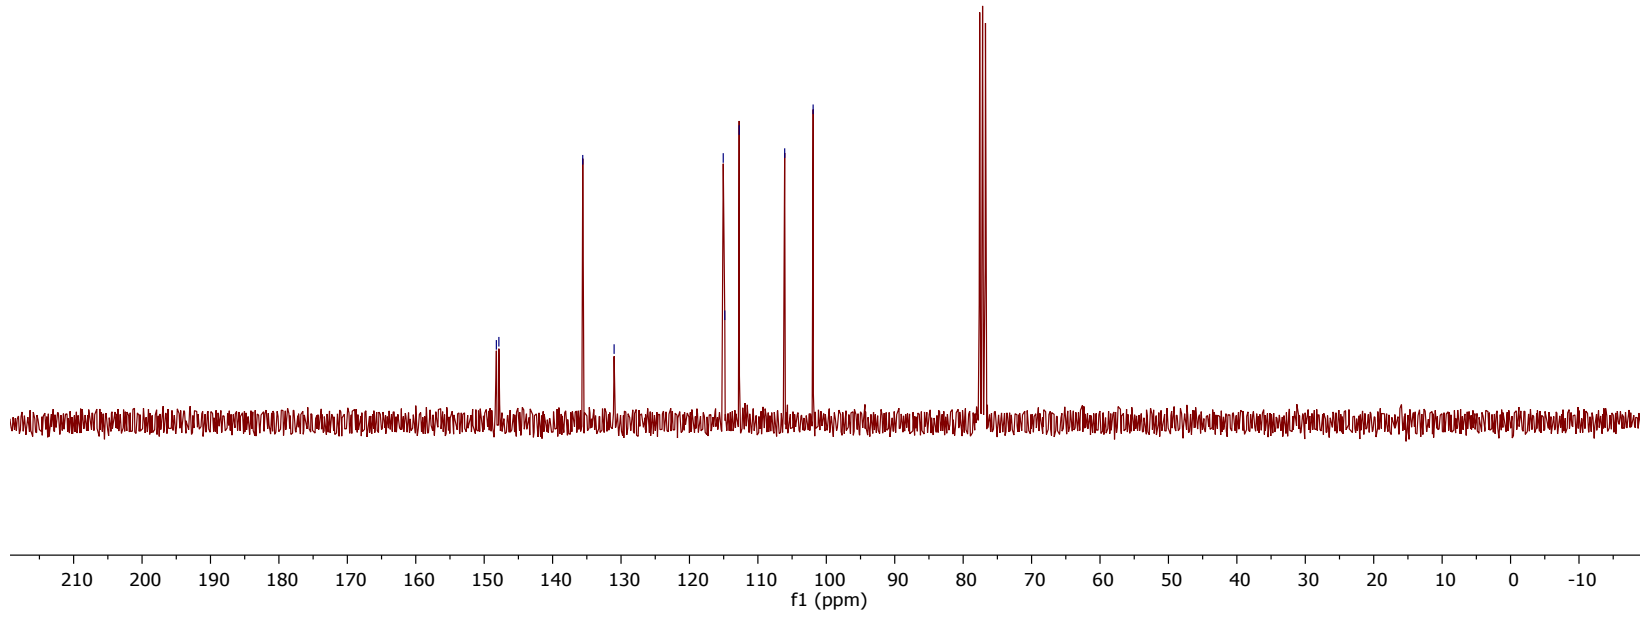

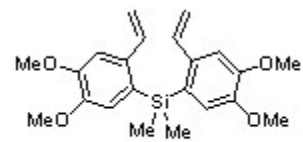

22a

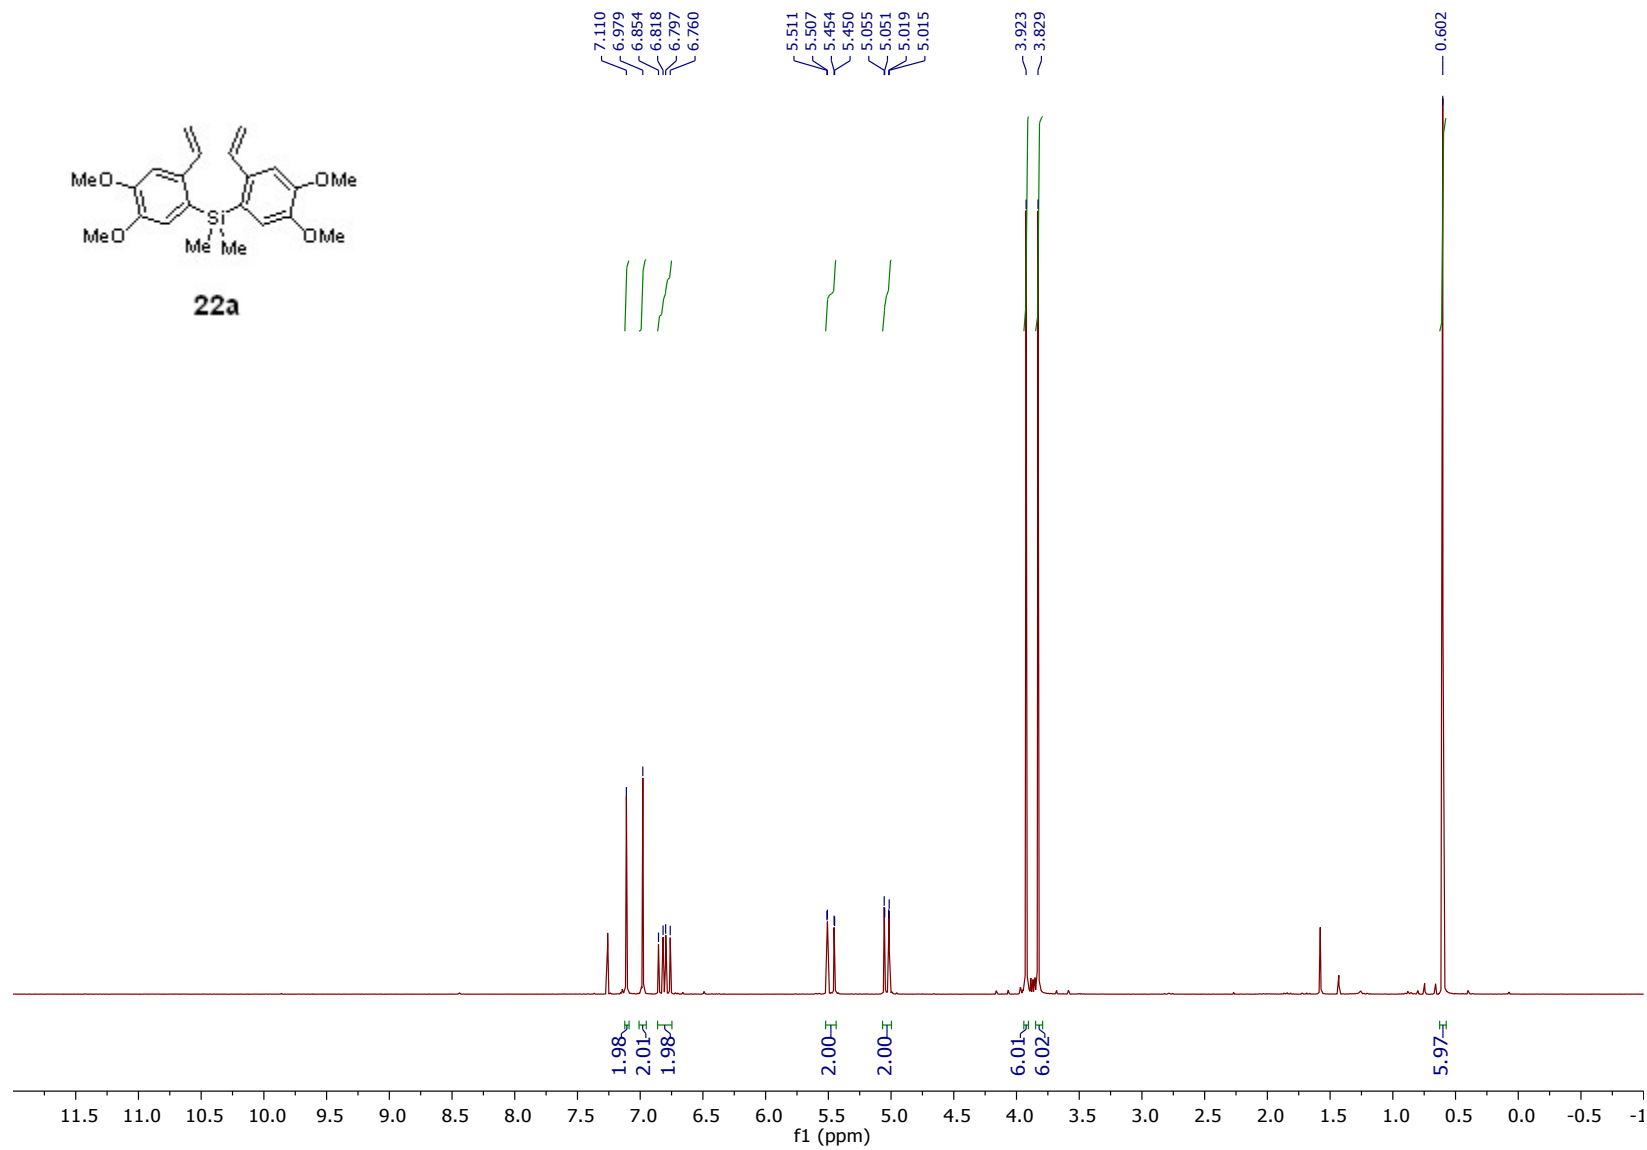

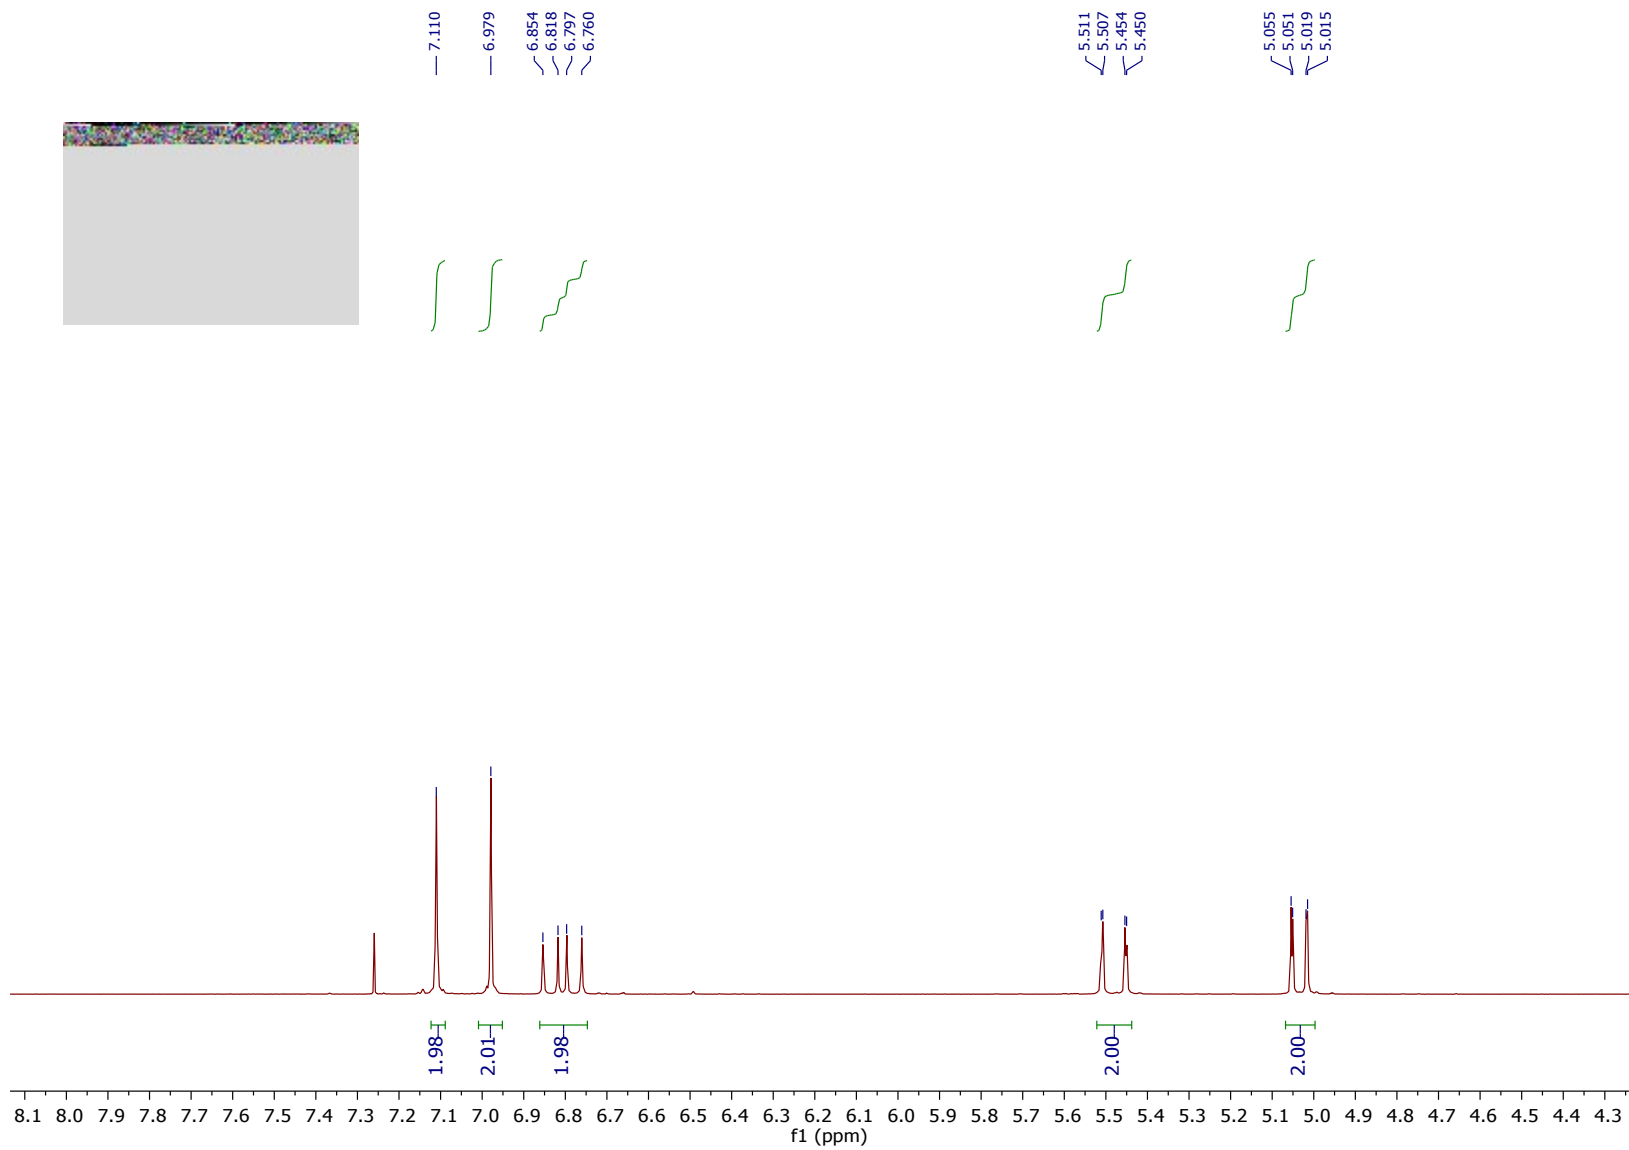

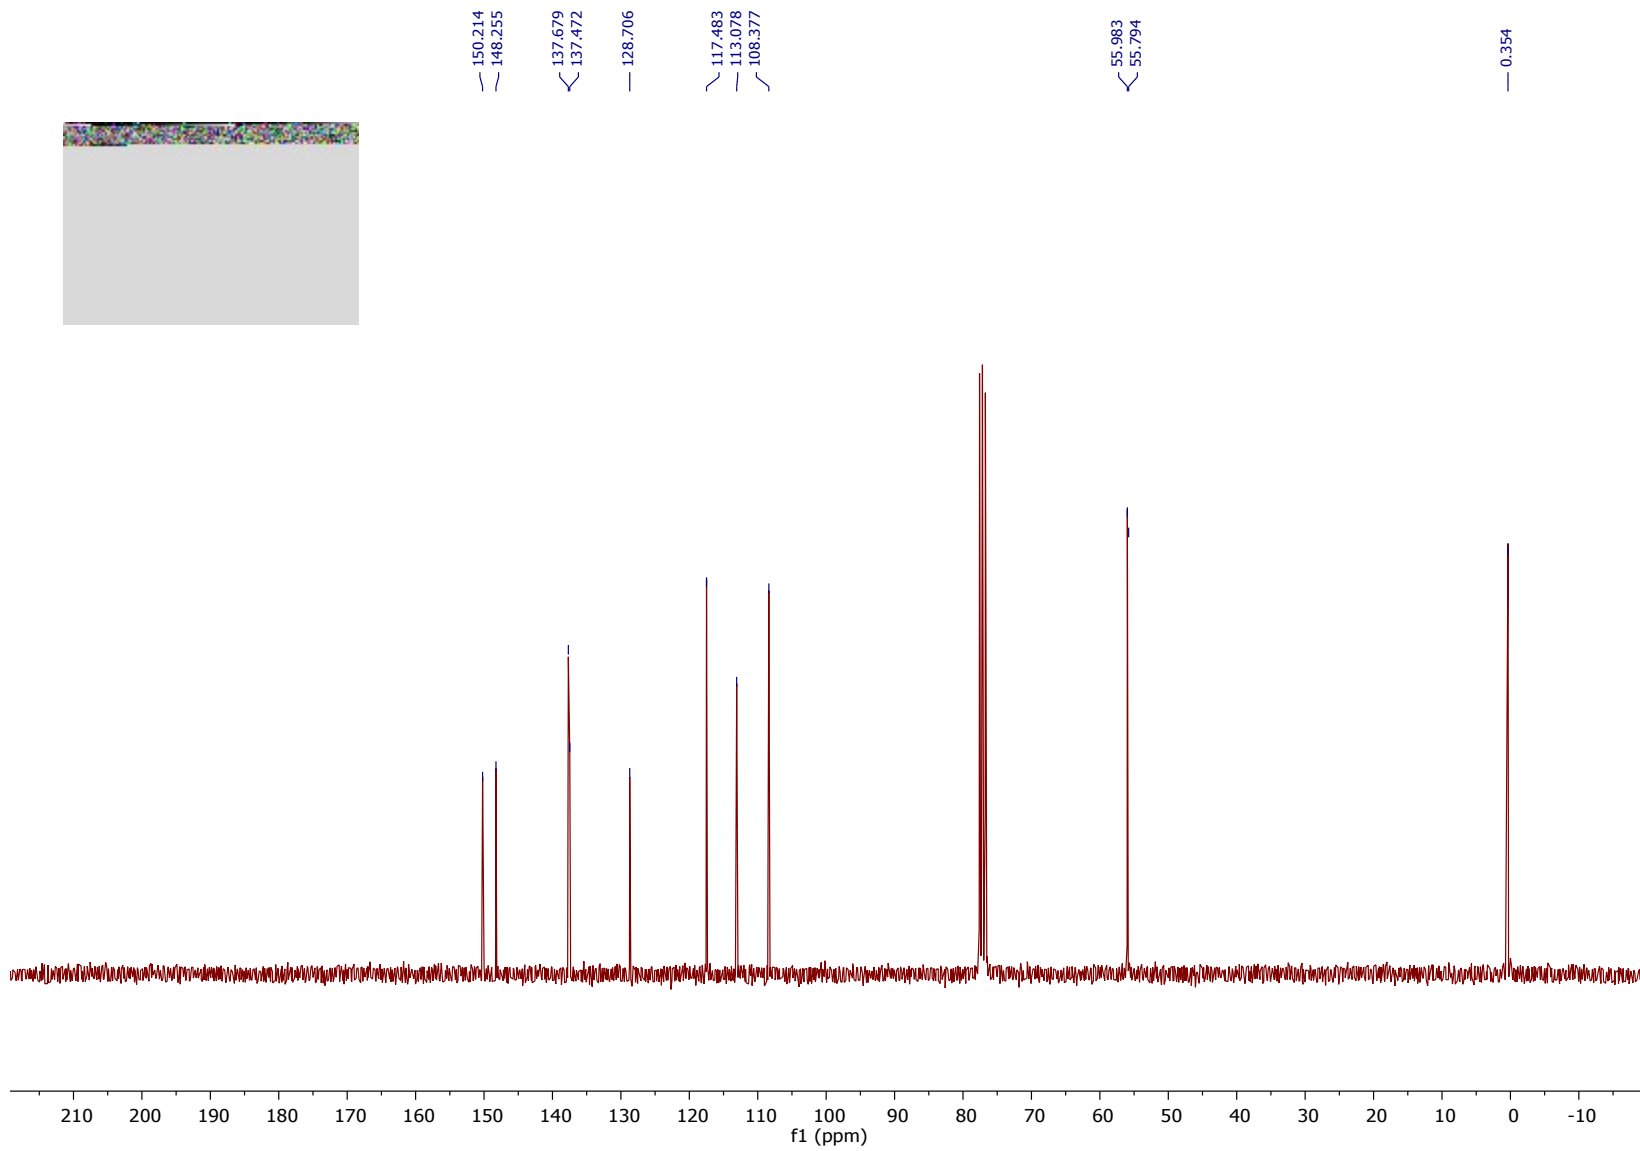

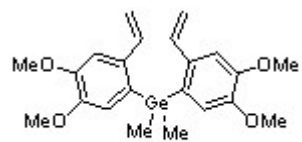

22b

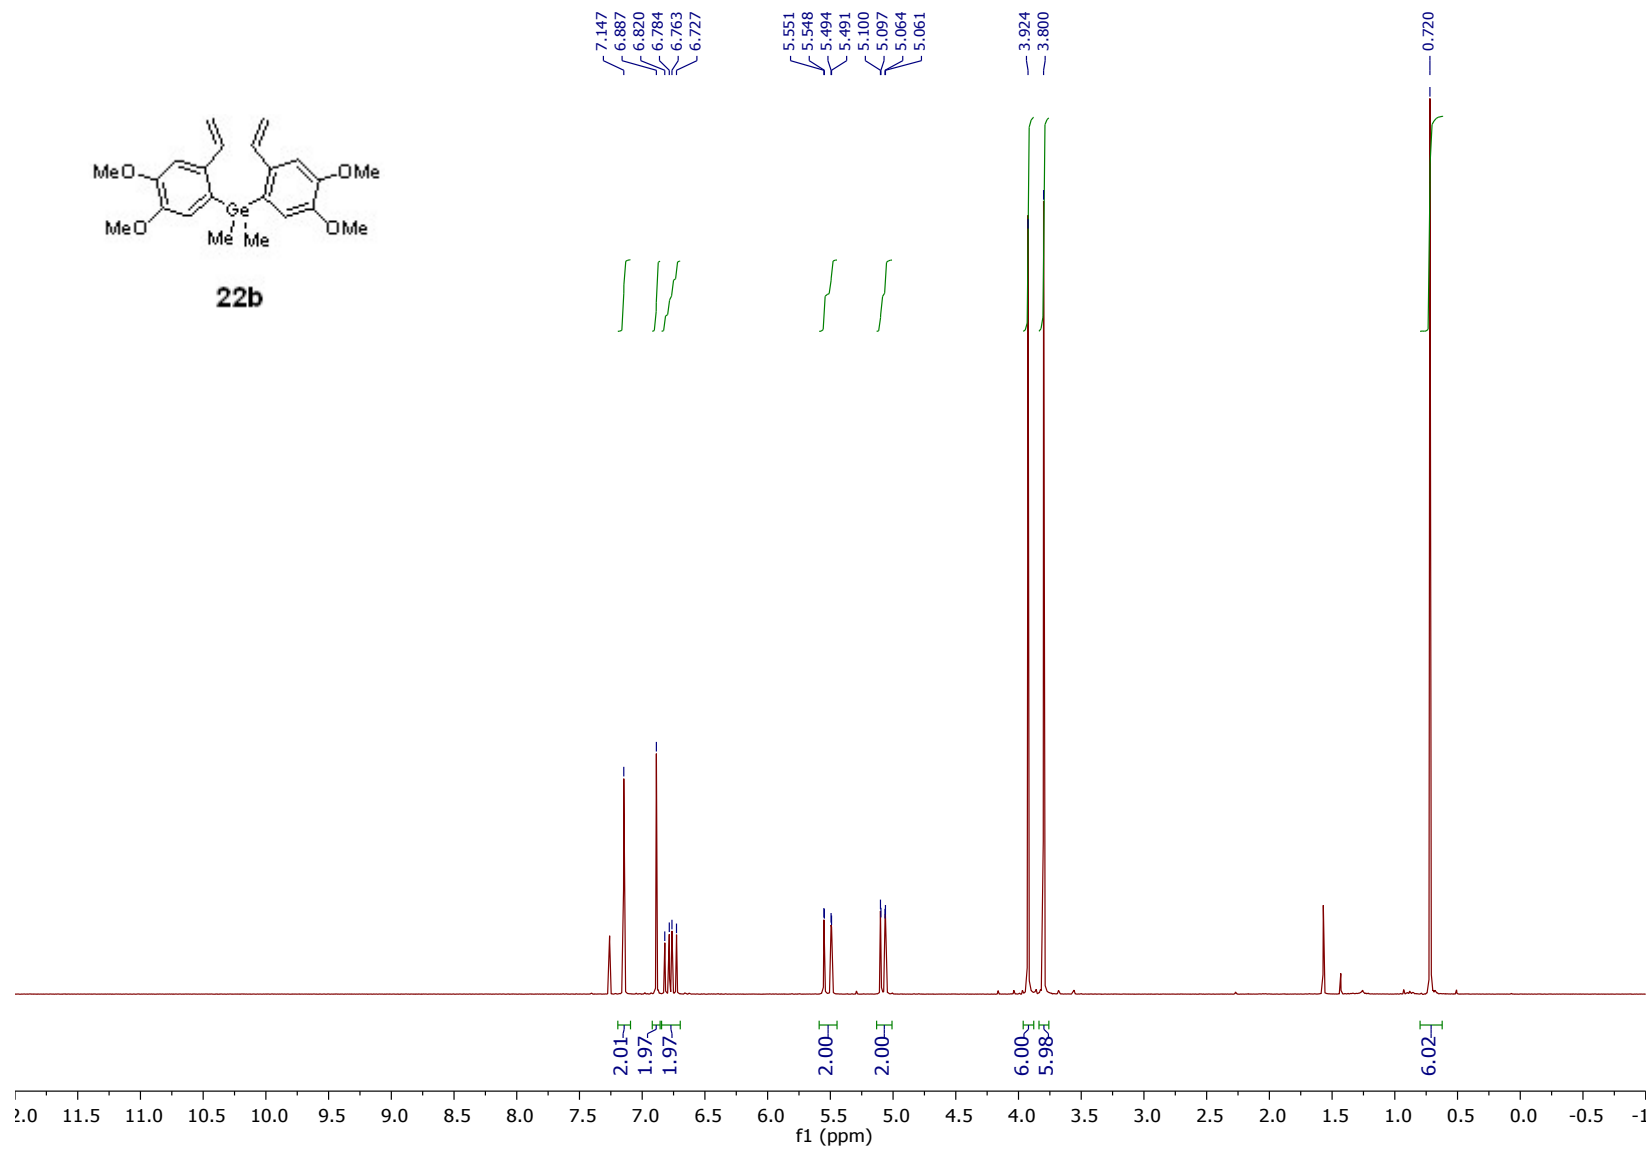

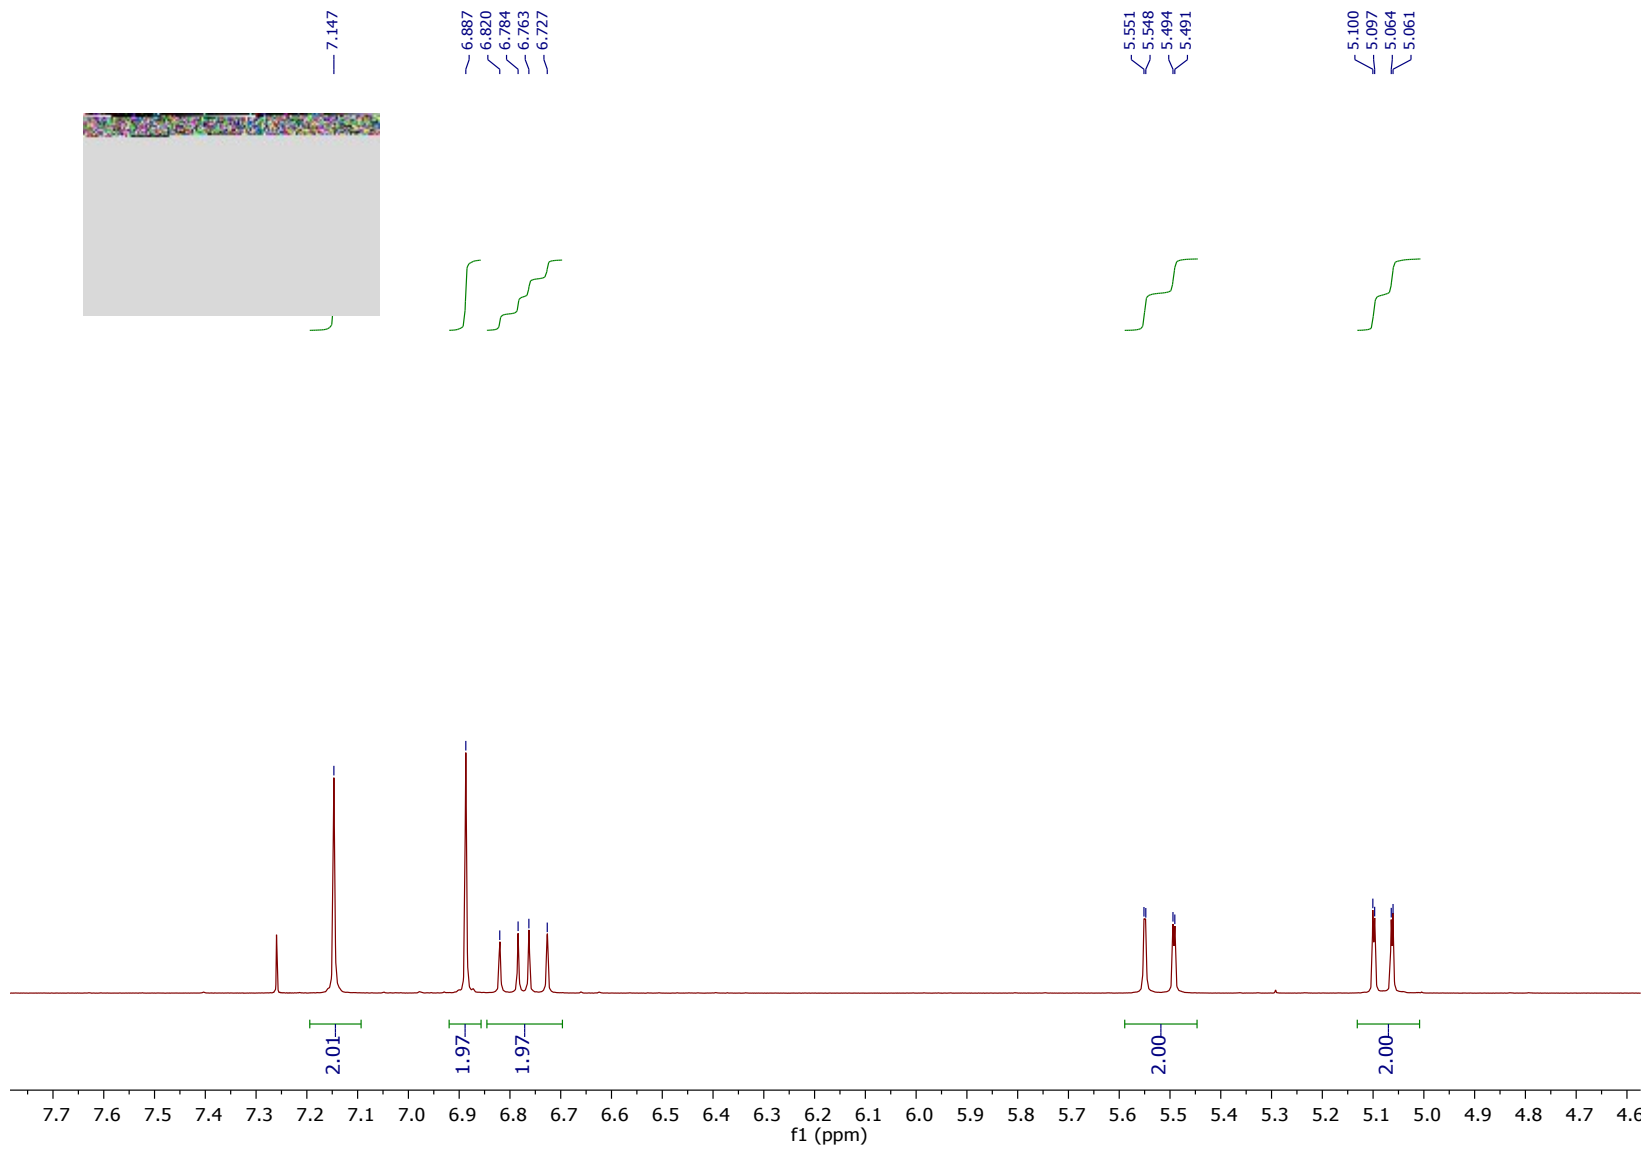

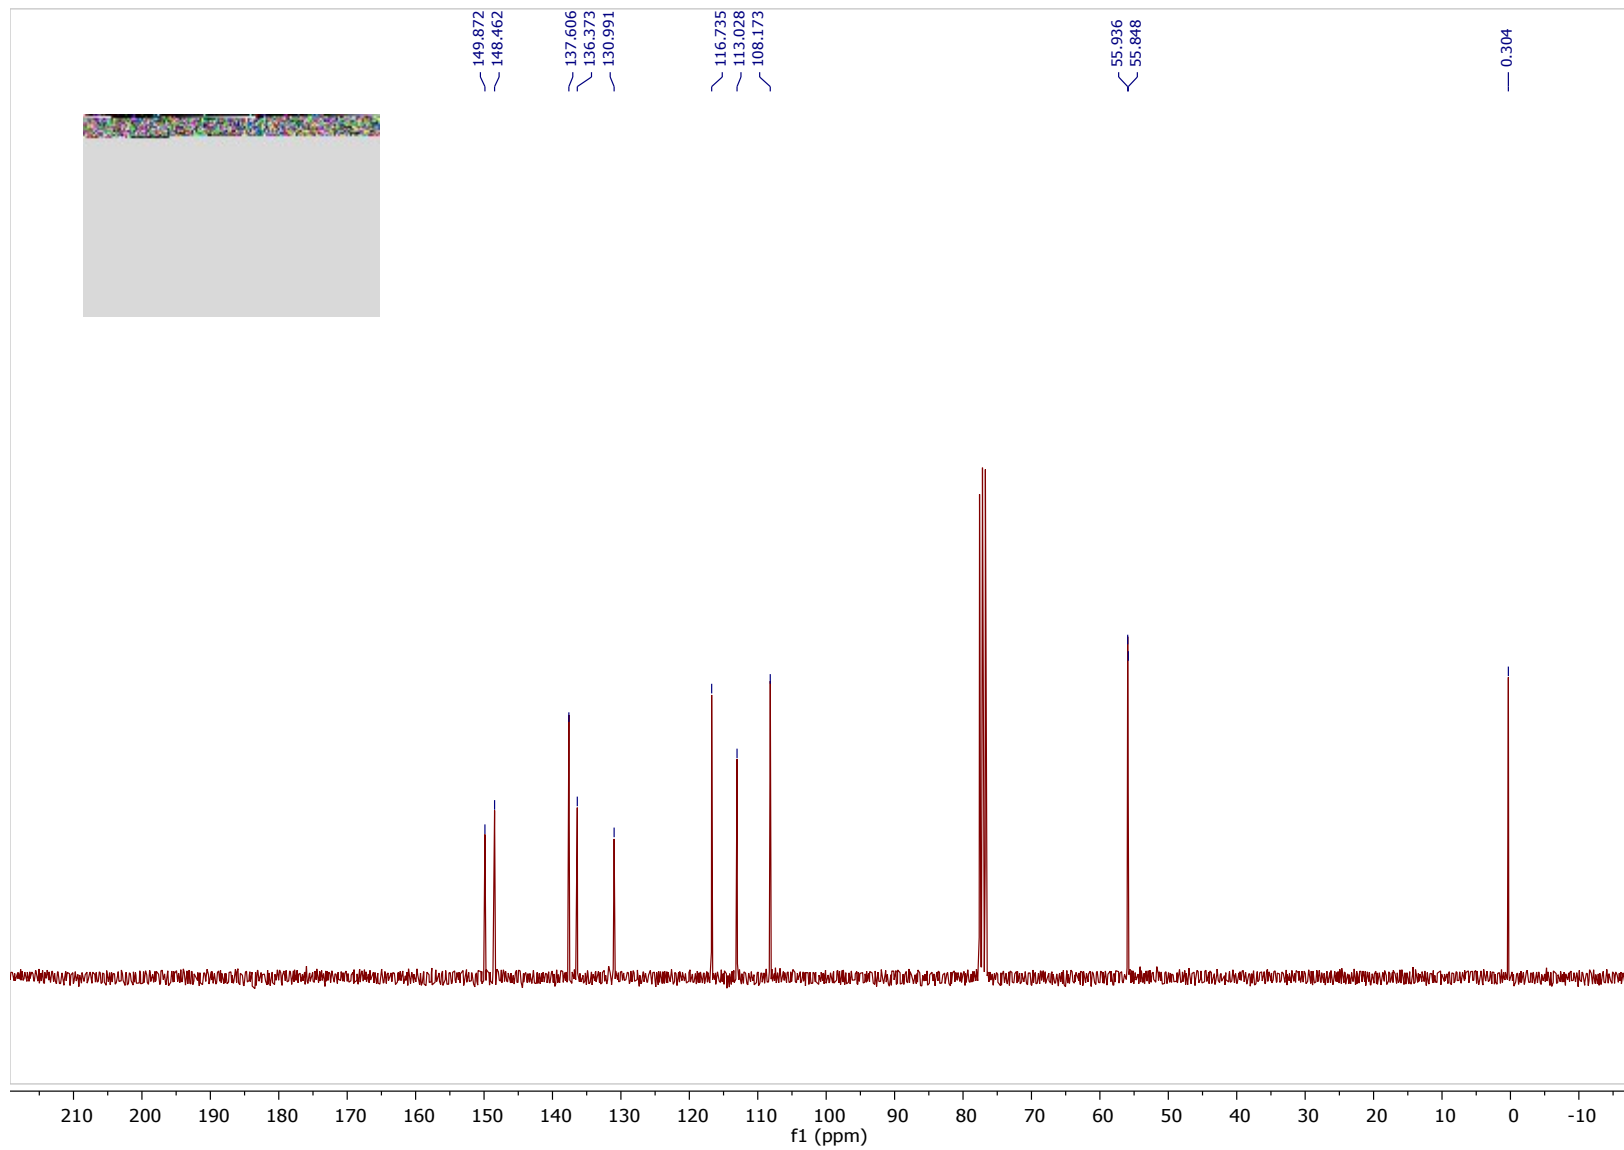

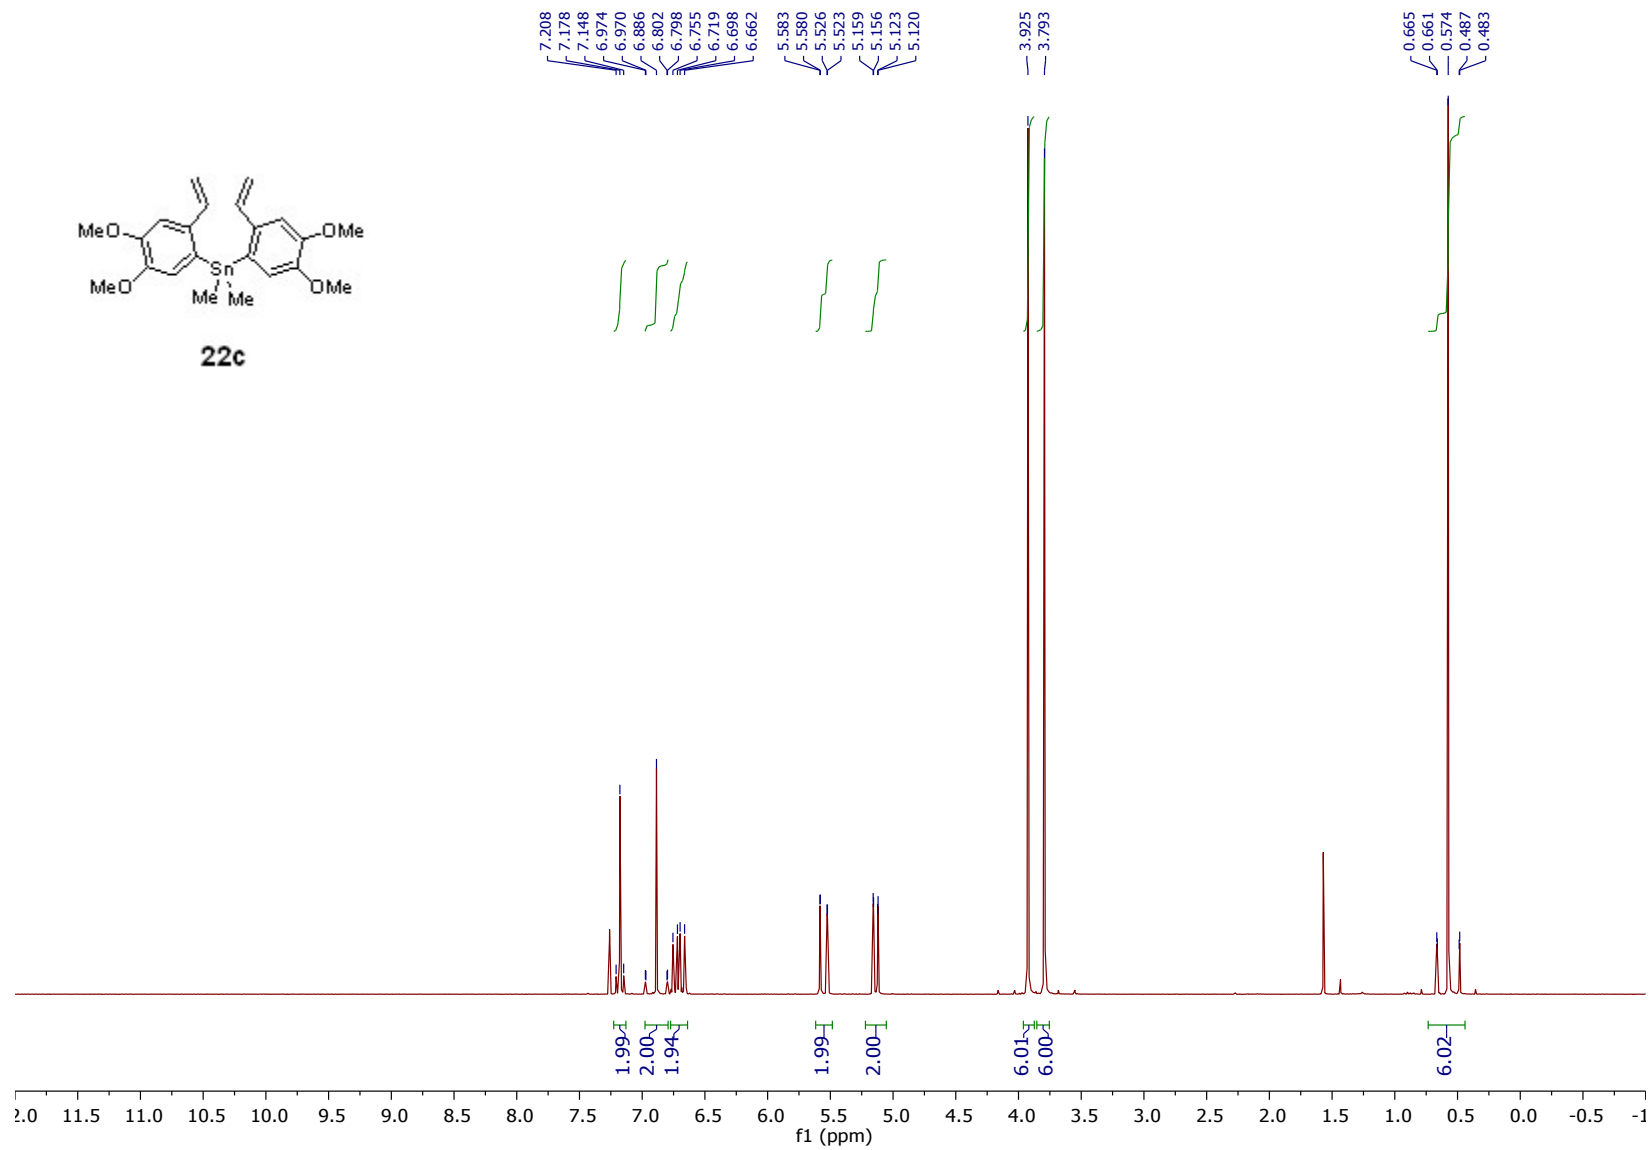



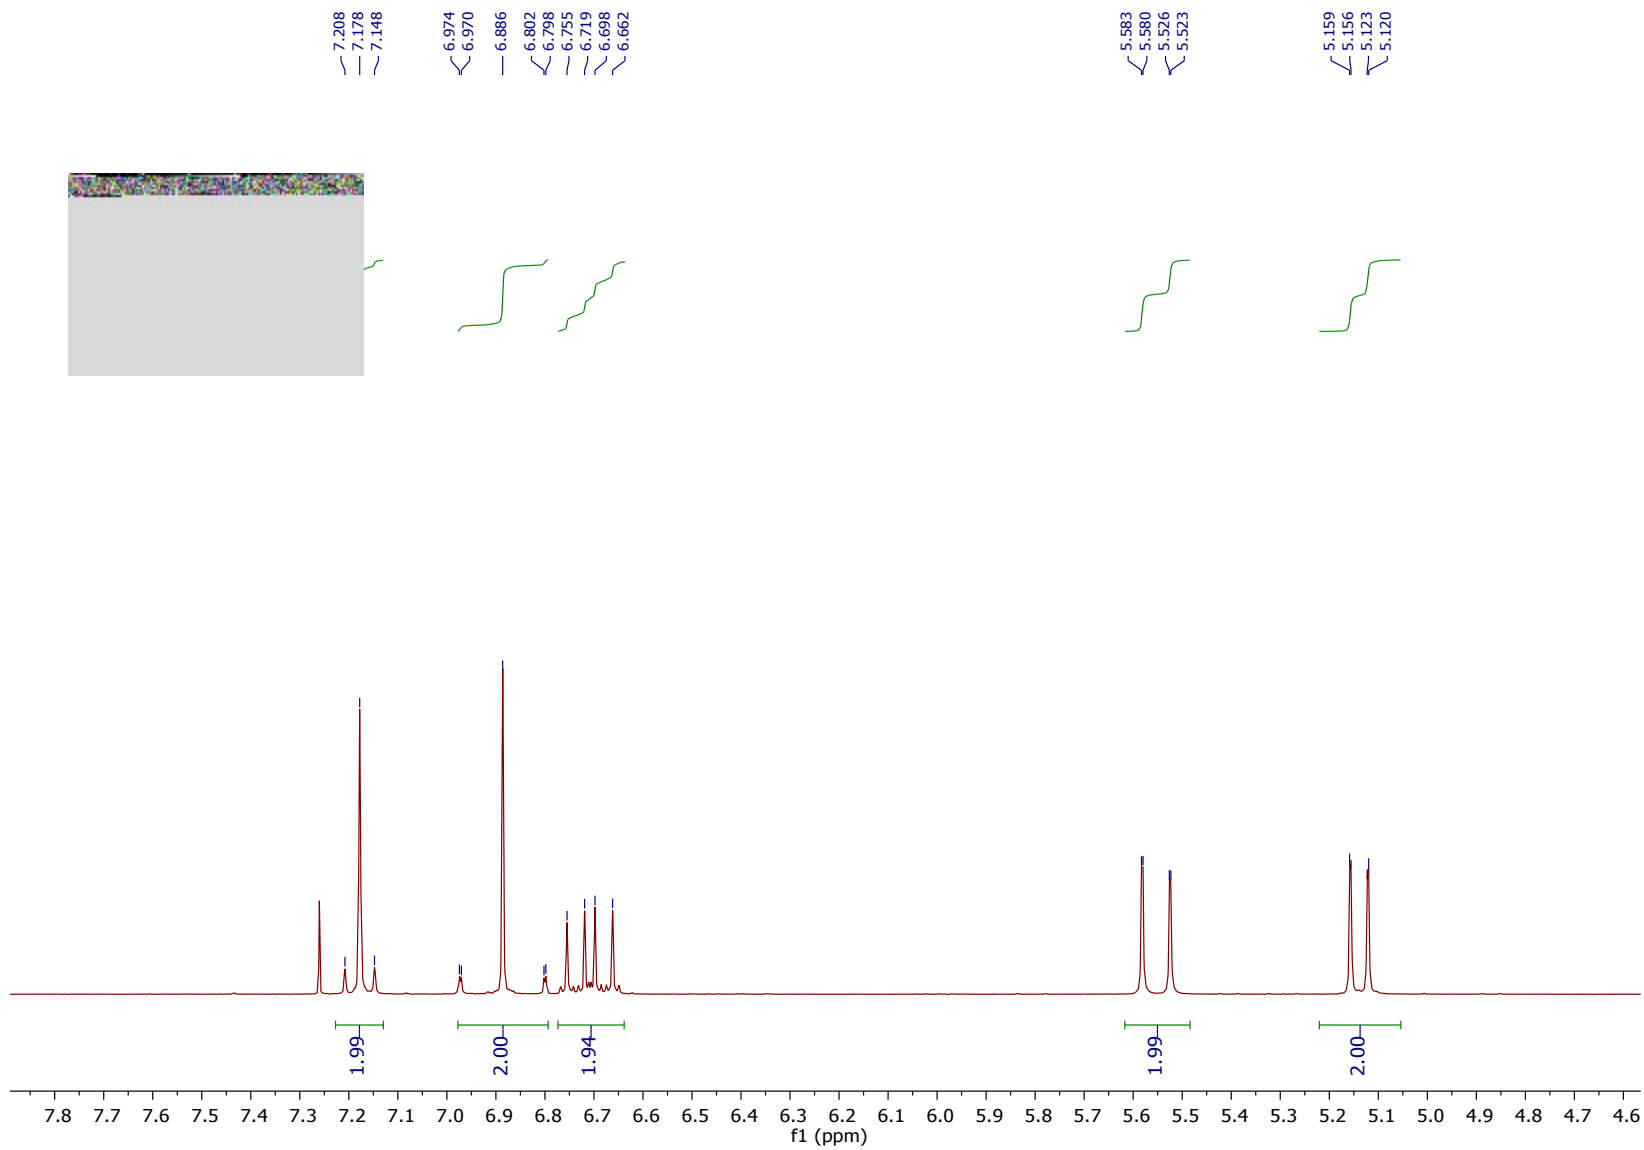

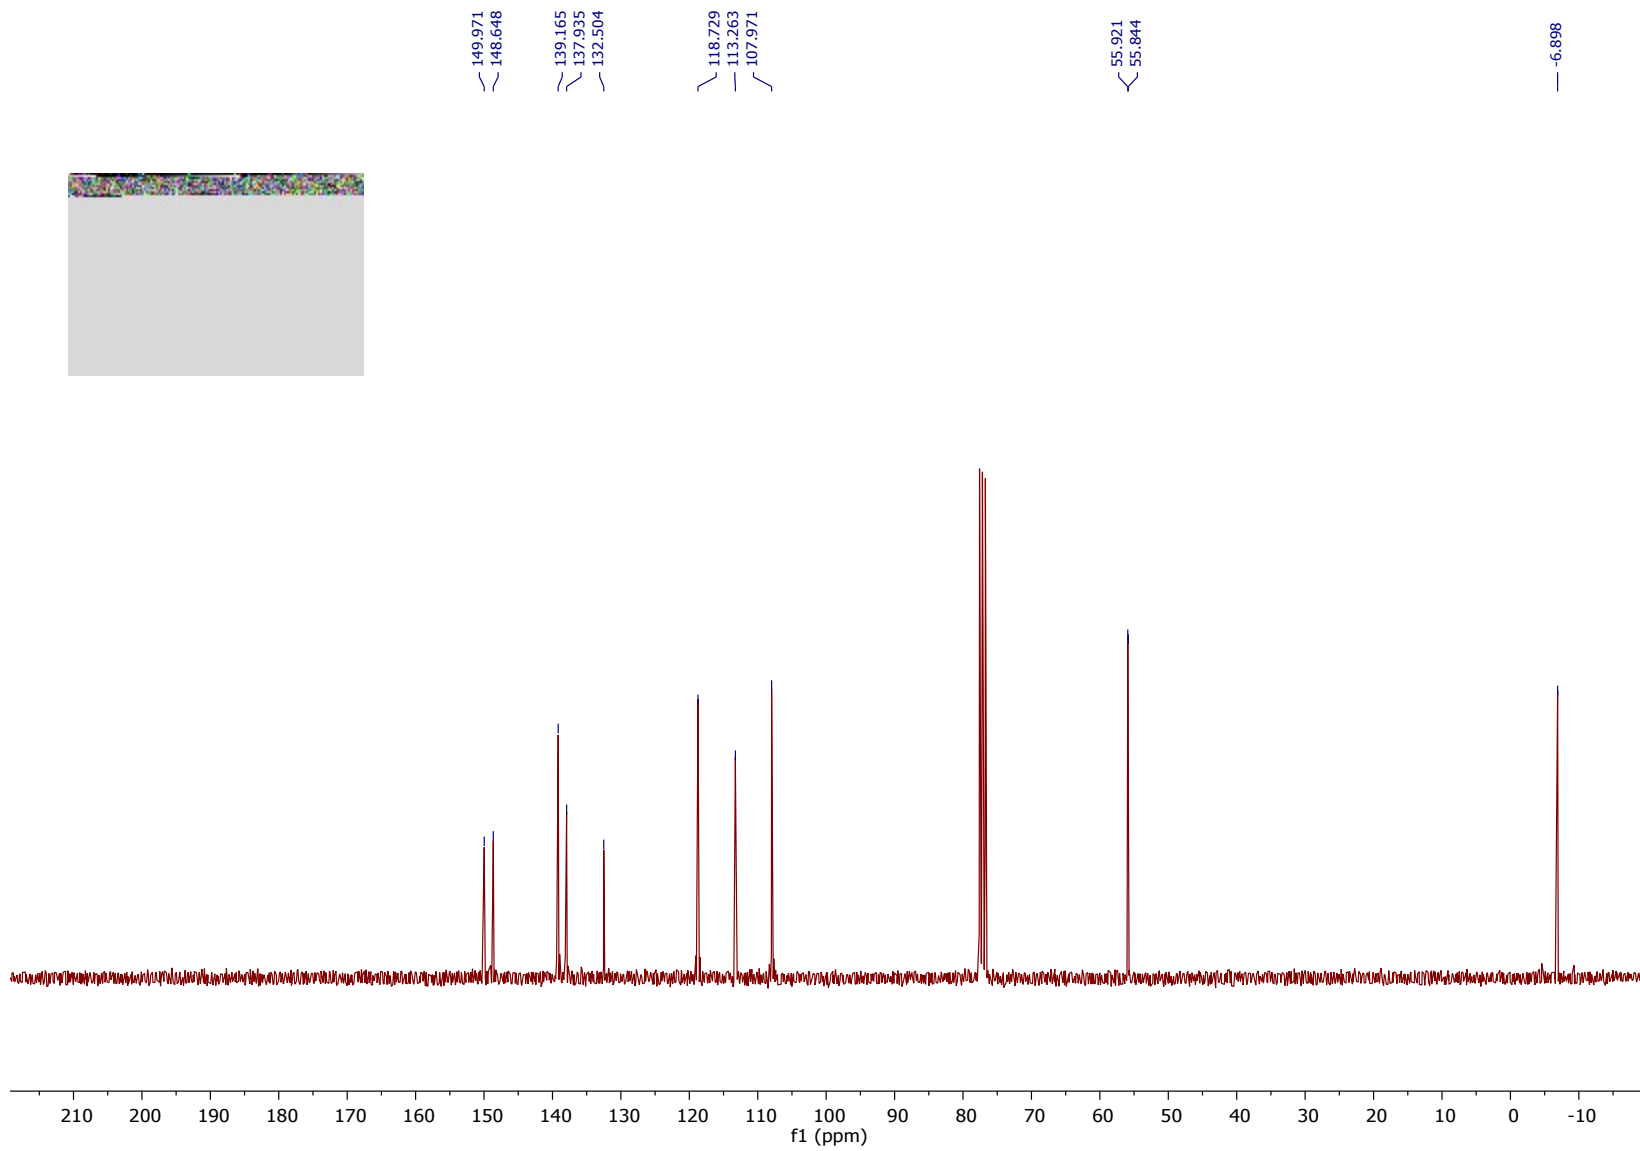

S-50

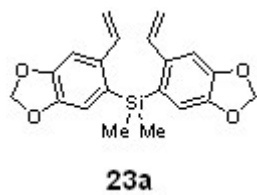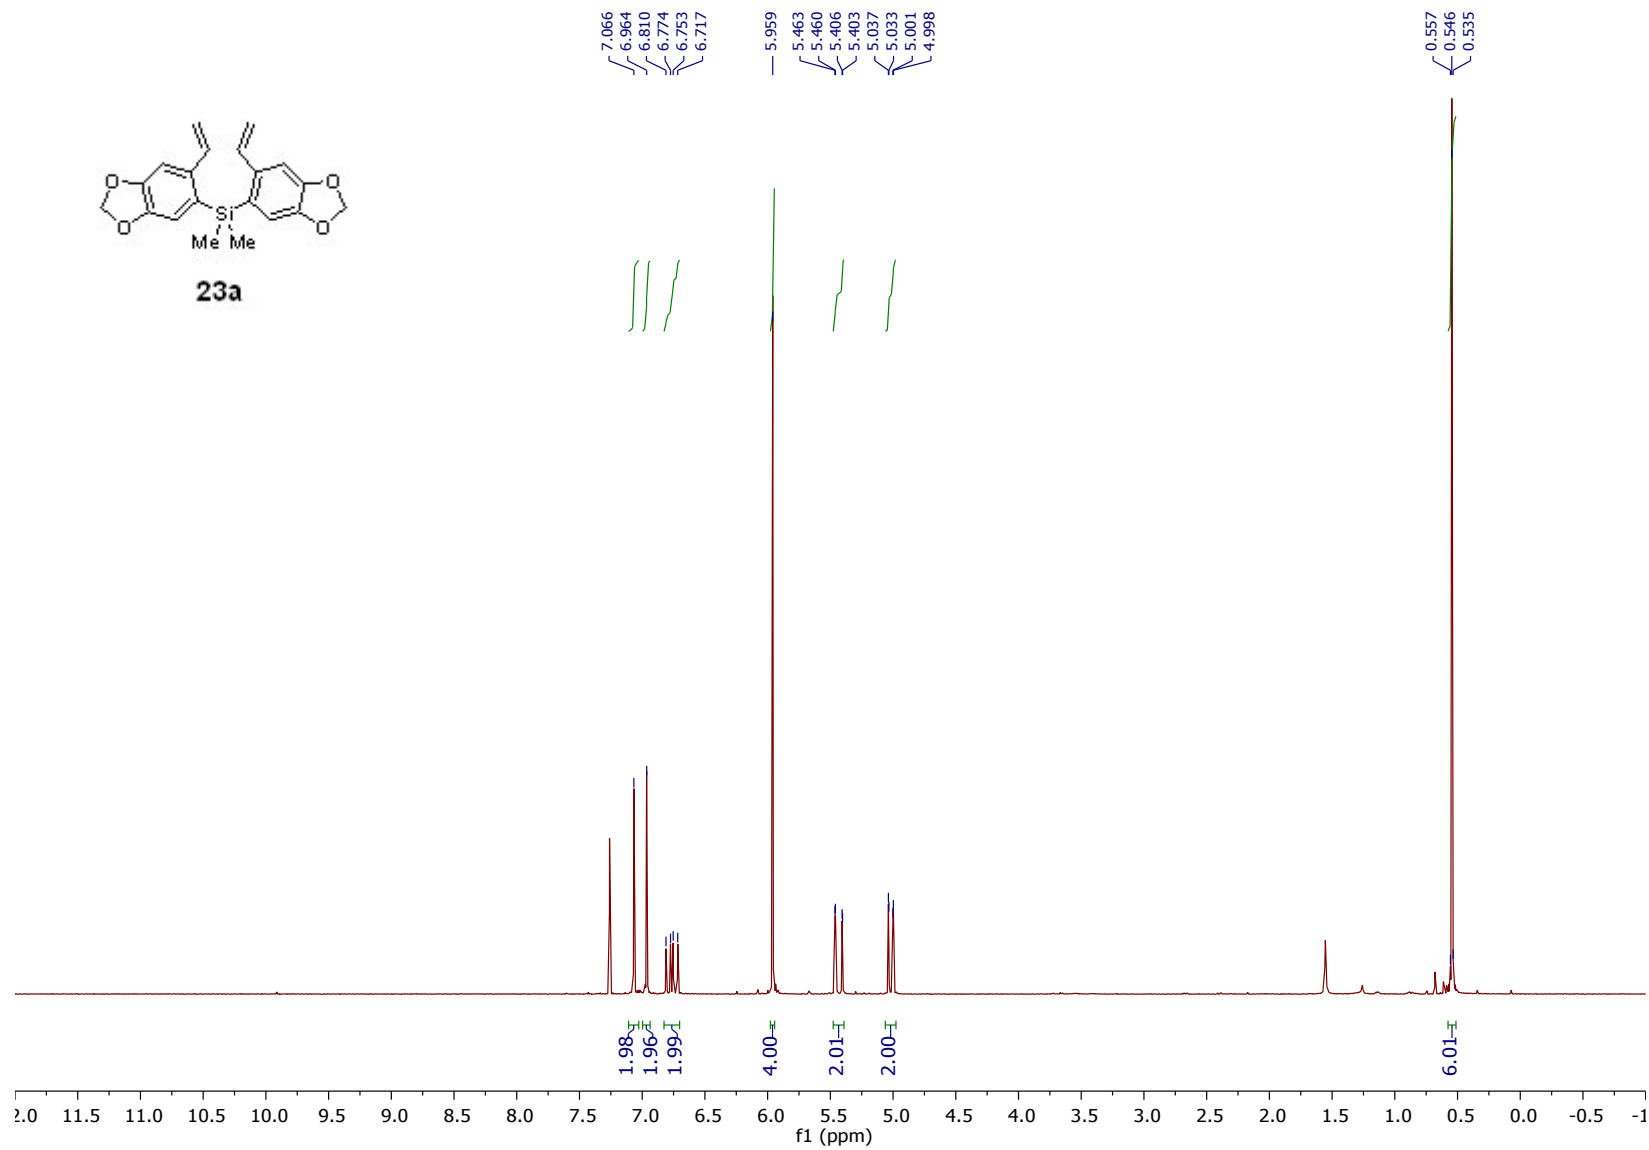

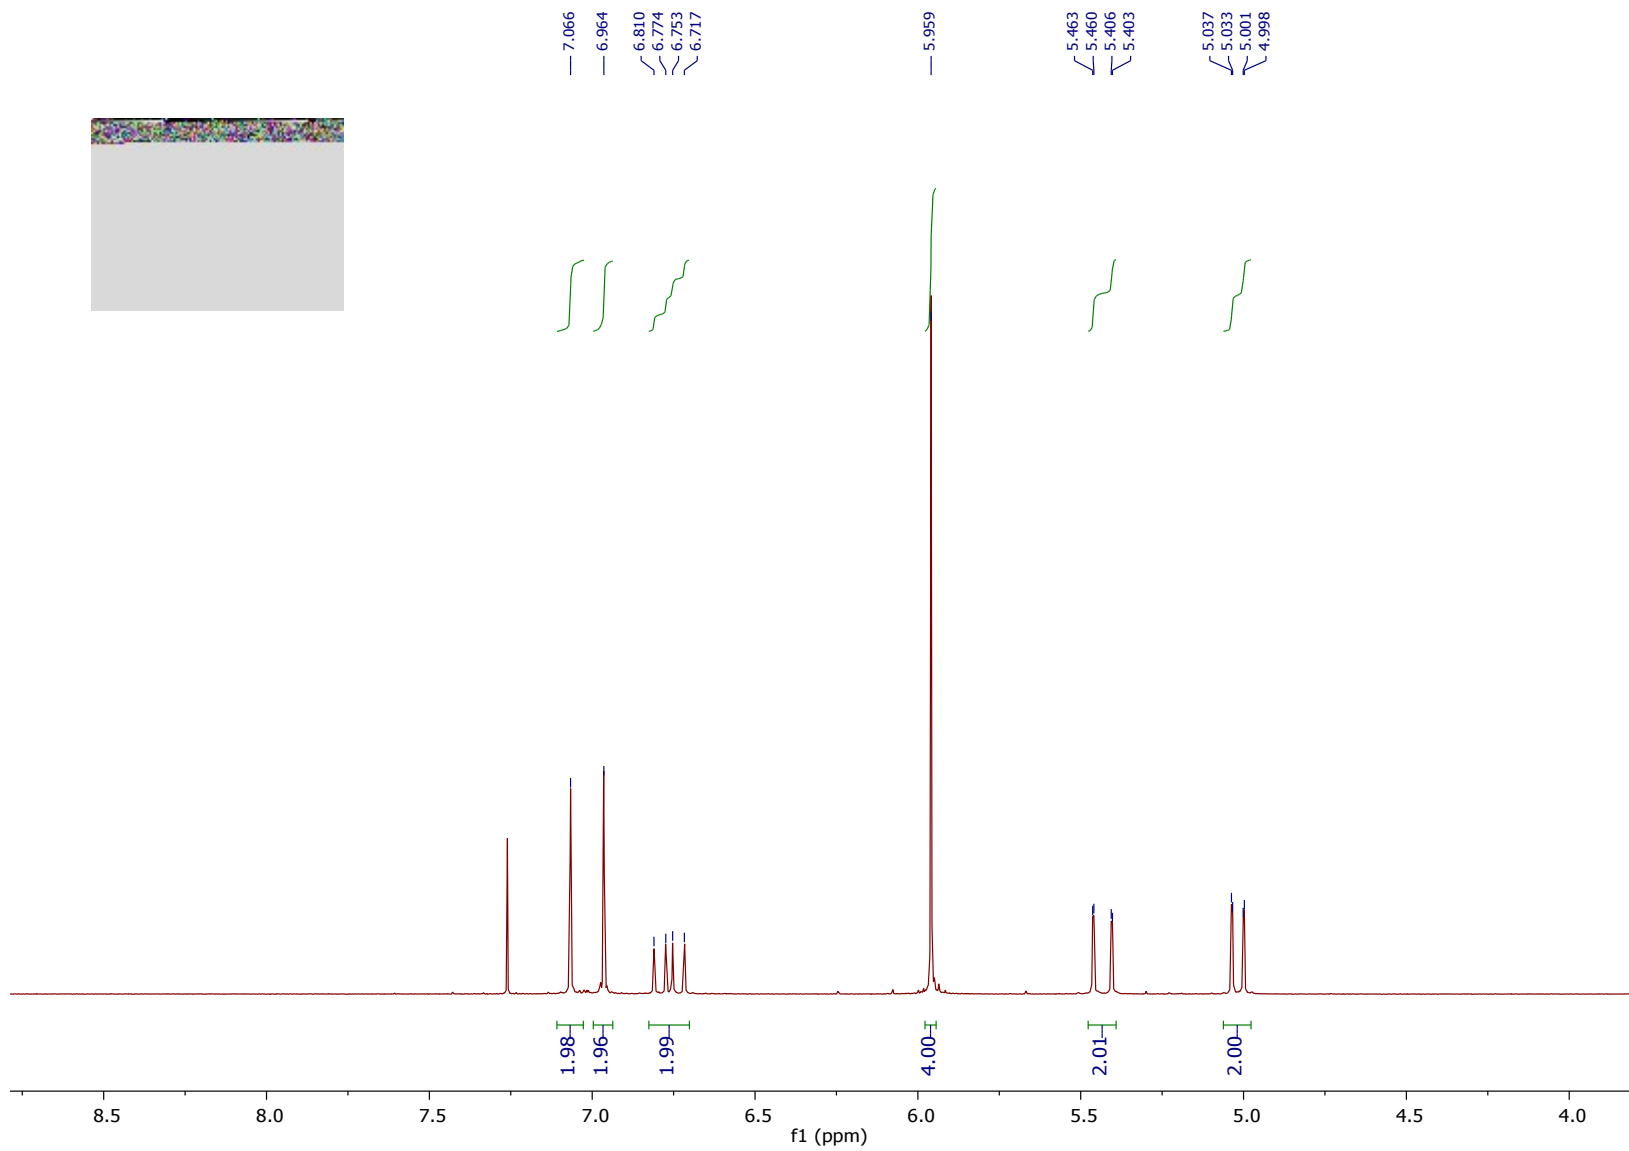

S-52

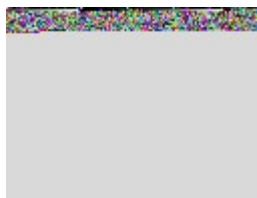

149.25  
147.14

138.93  
137.35

130.42

113.86  
113.48

106.04

101.03

77.58 CDCl3  
77.15 CDCl3  
76.73 CDCl3

0.26

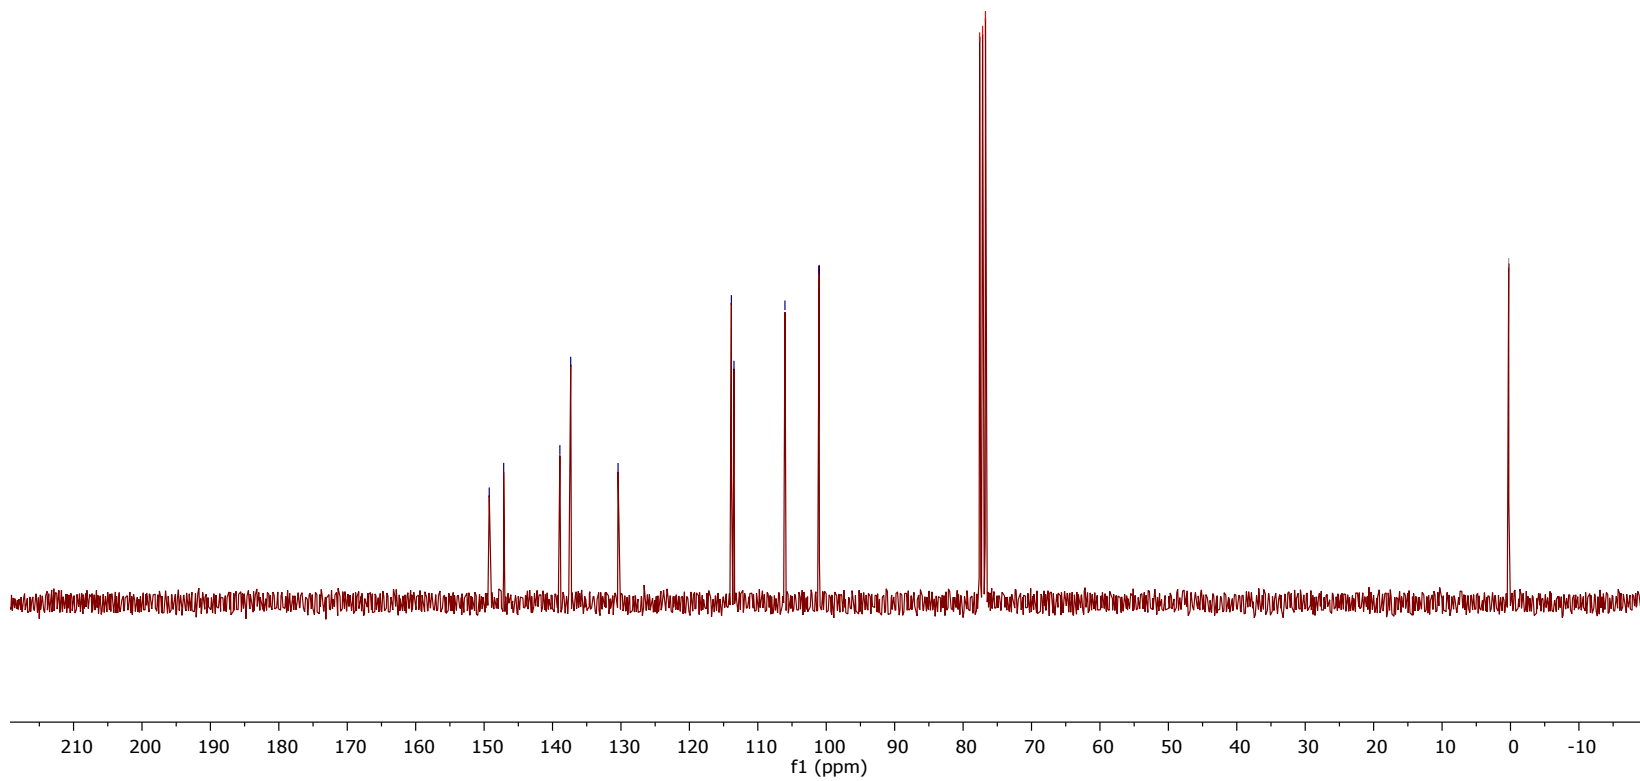

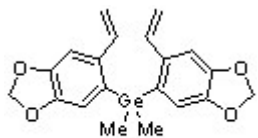

23b

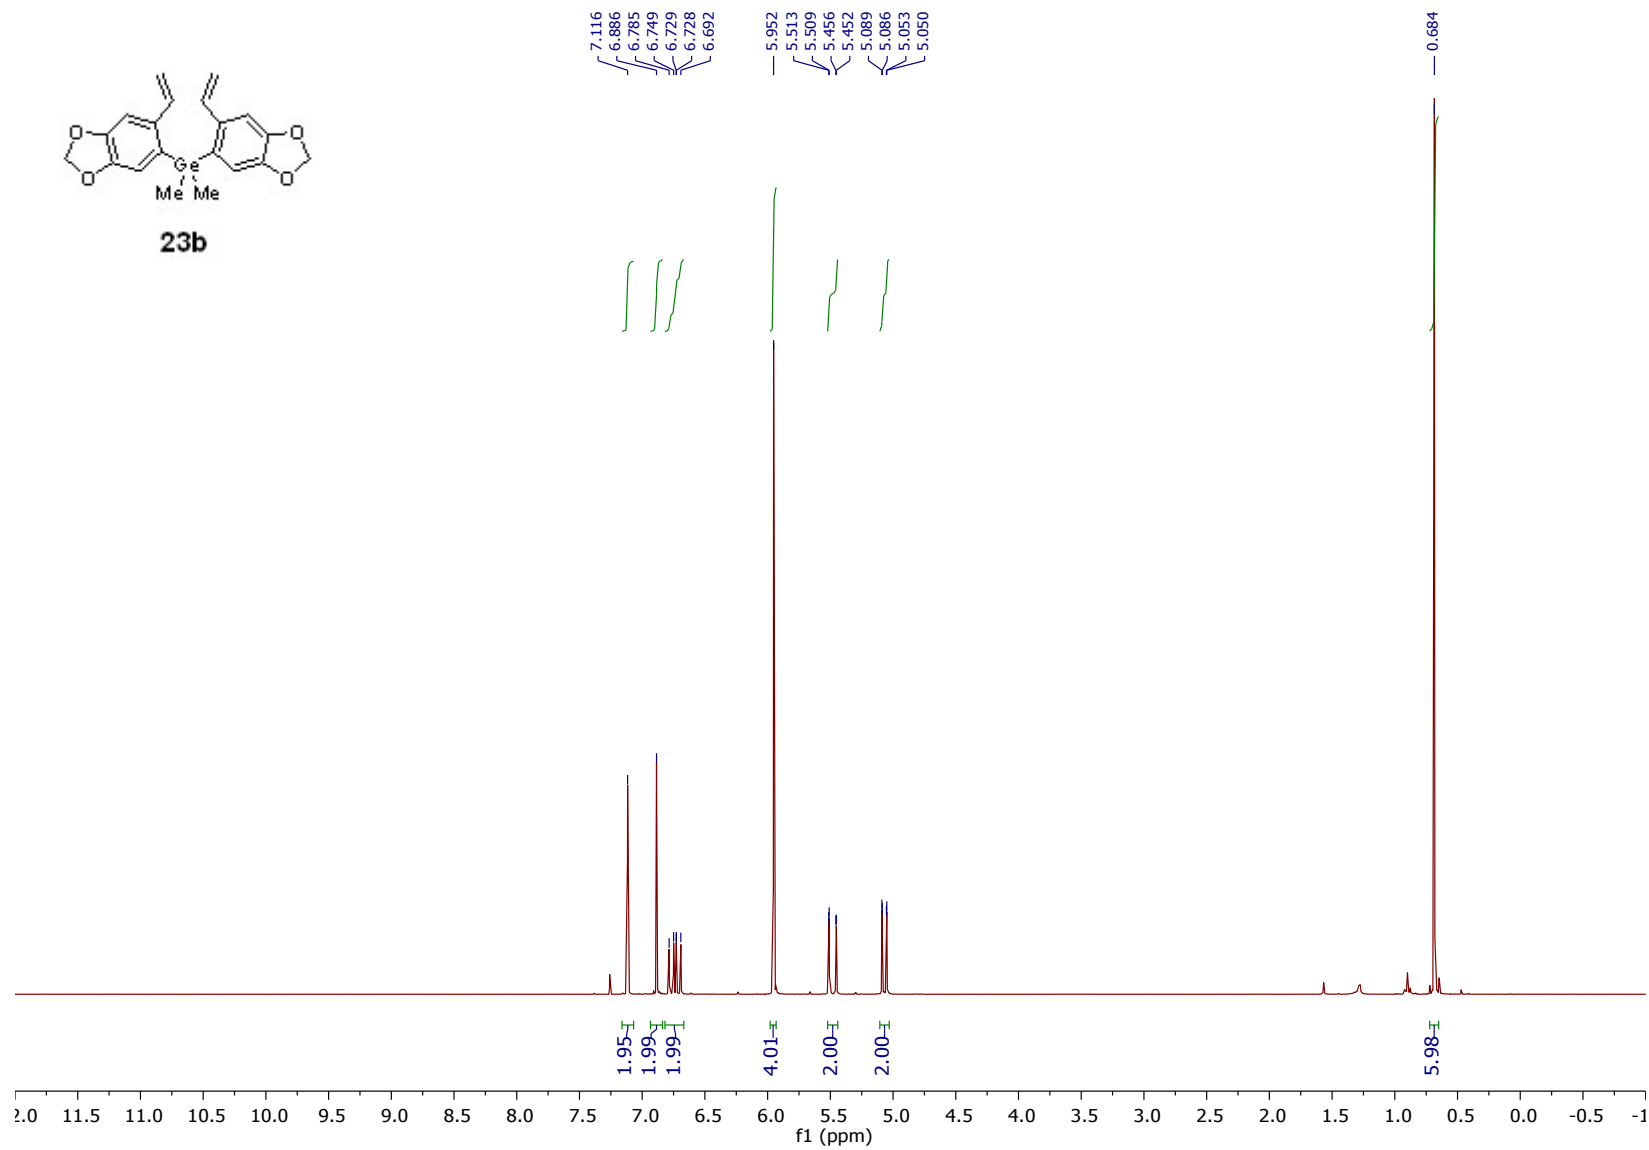

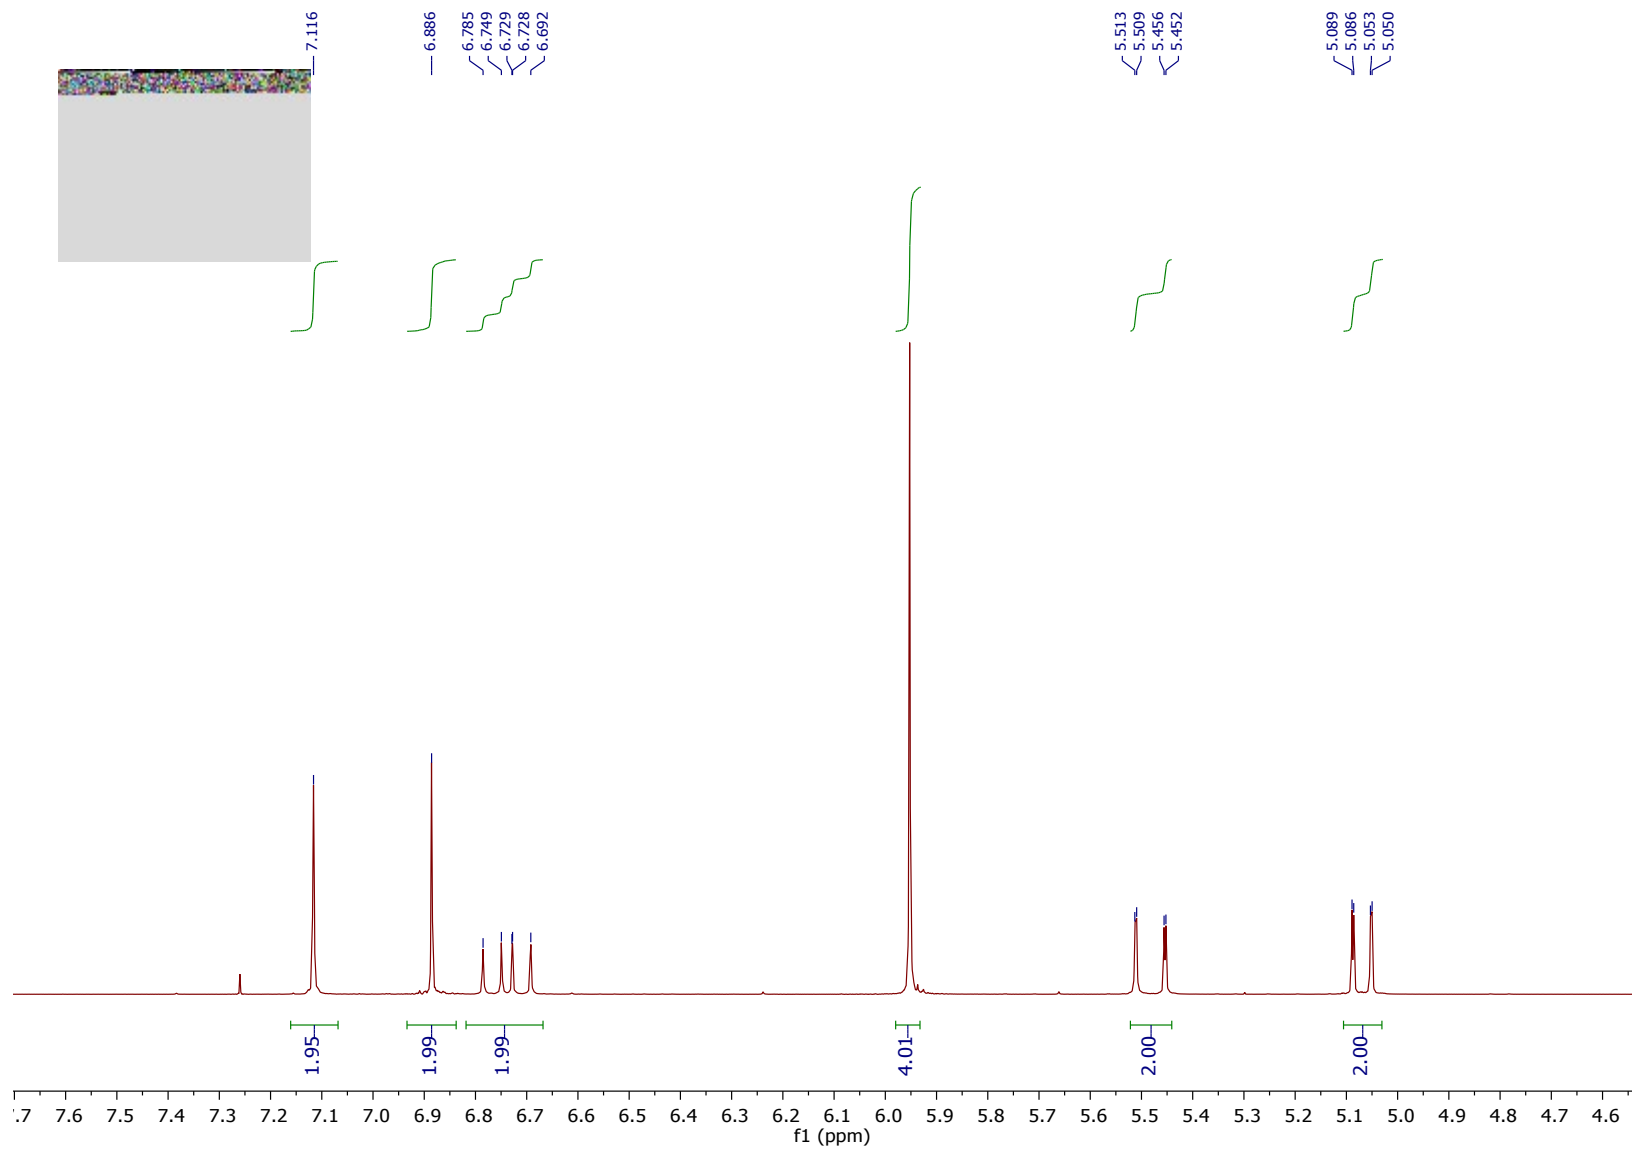

S-55

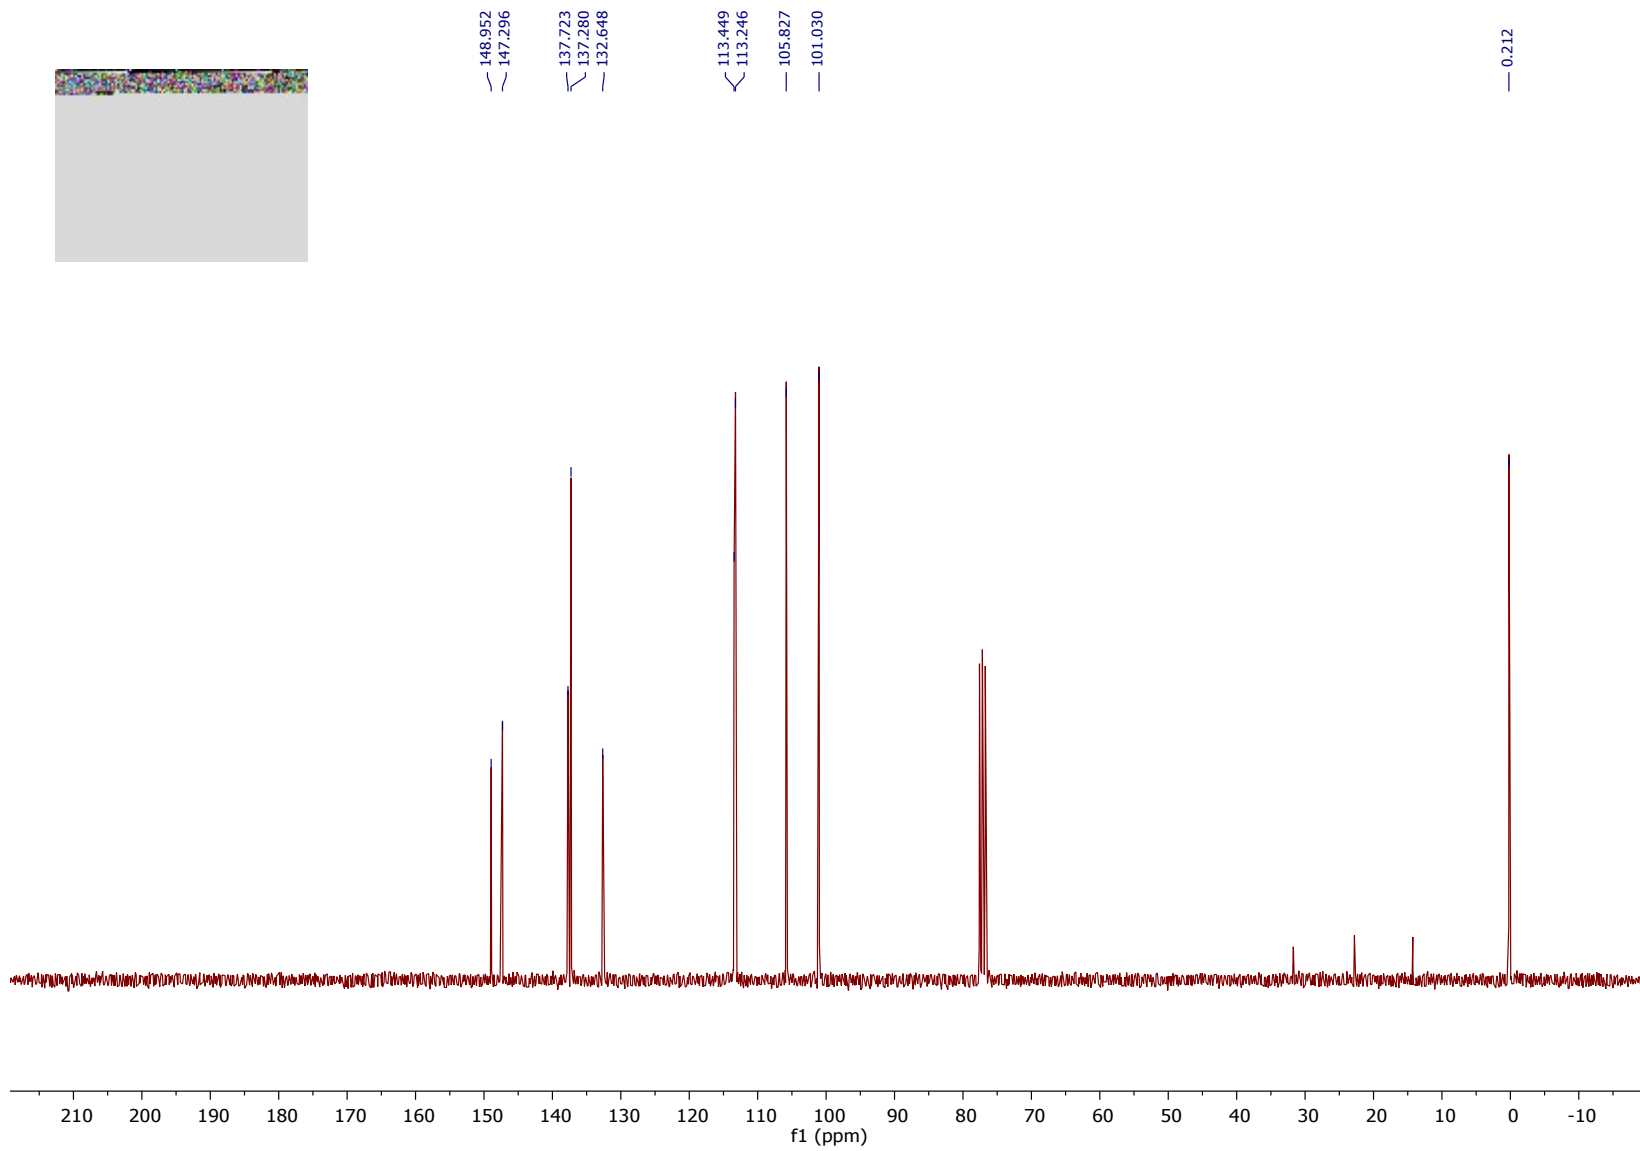



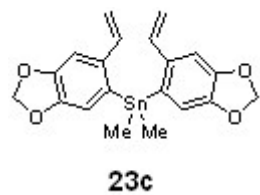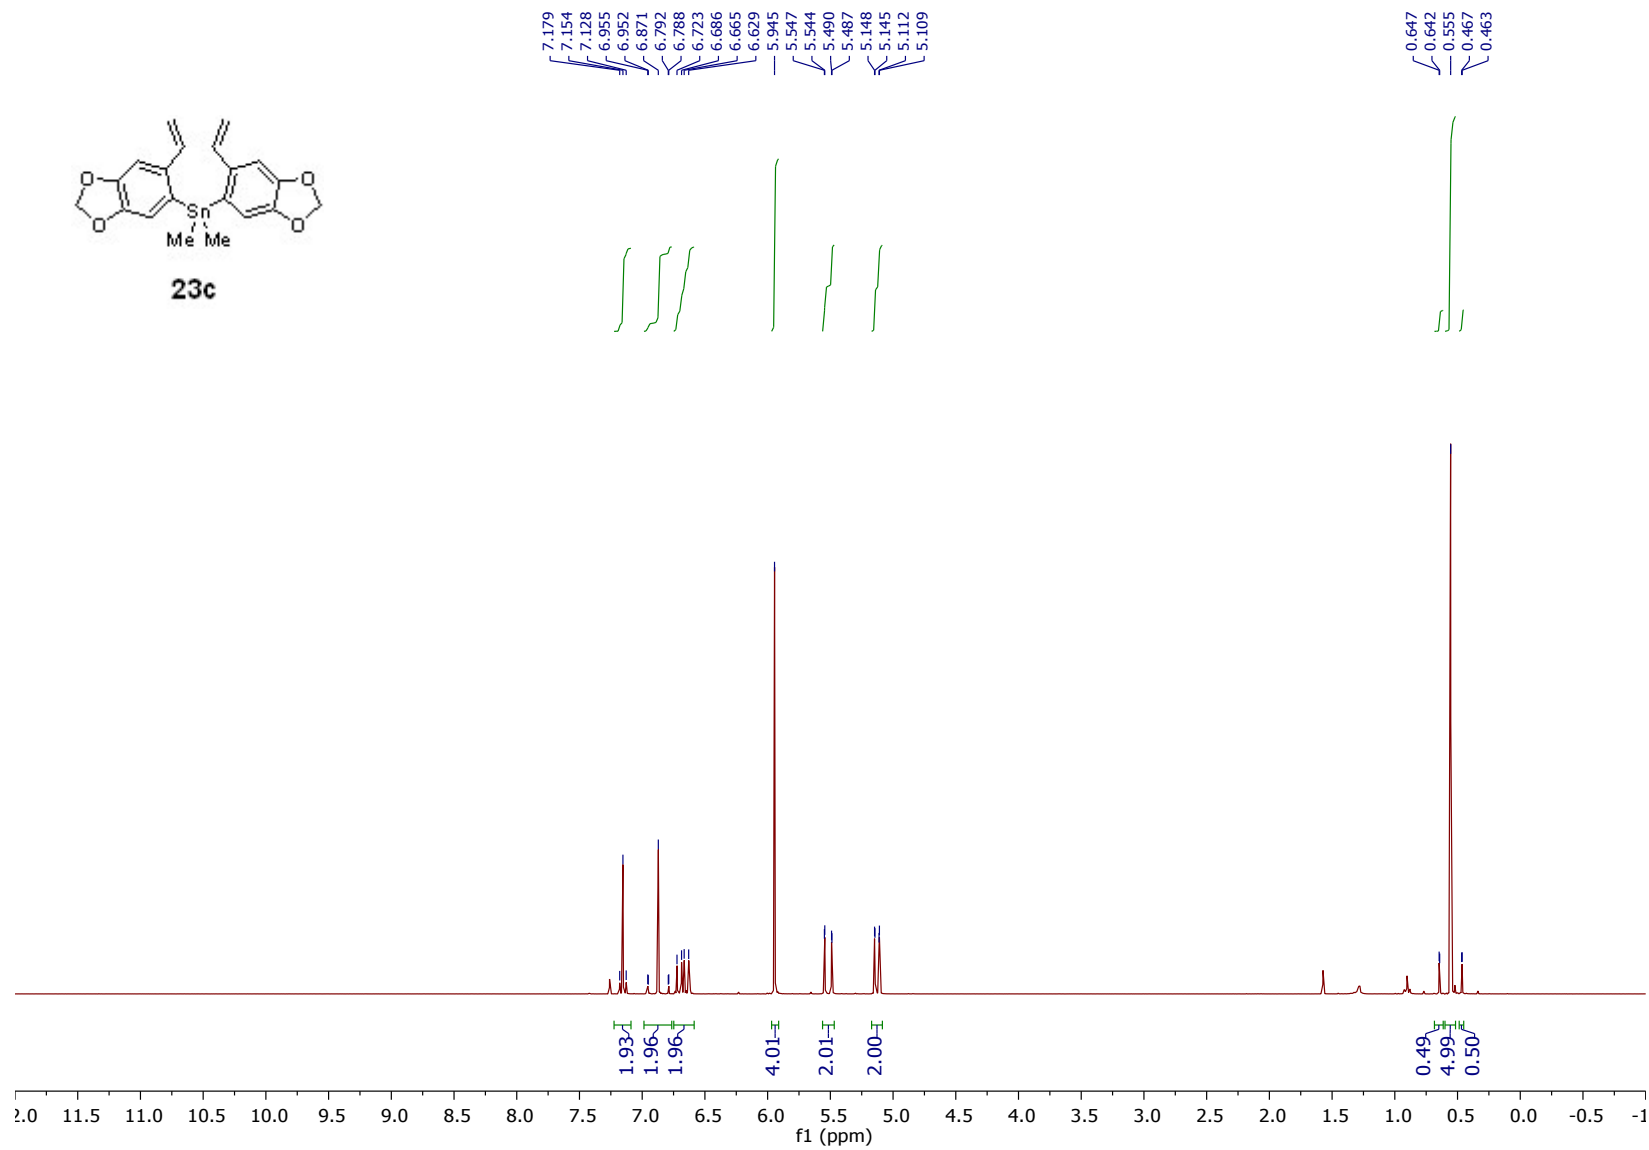

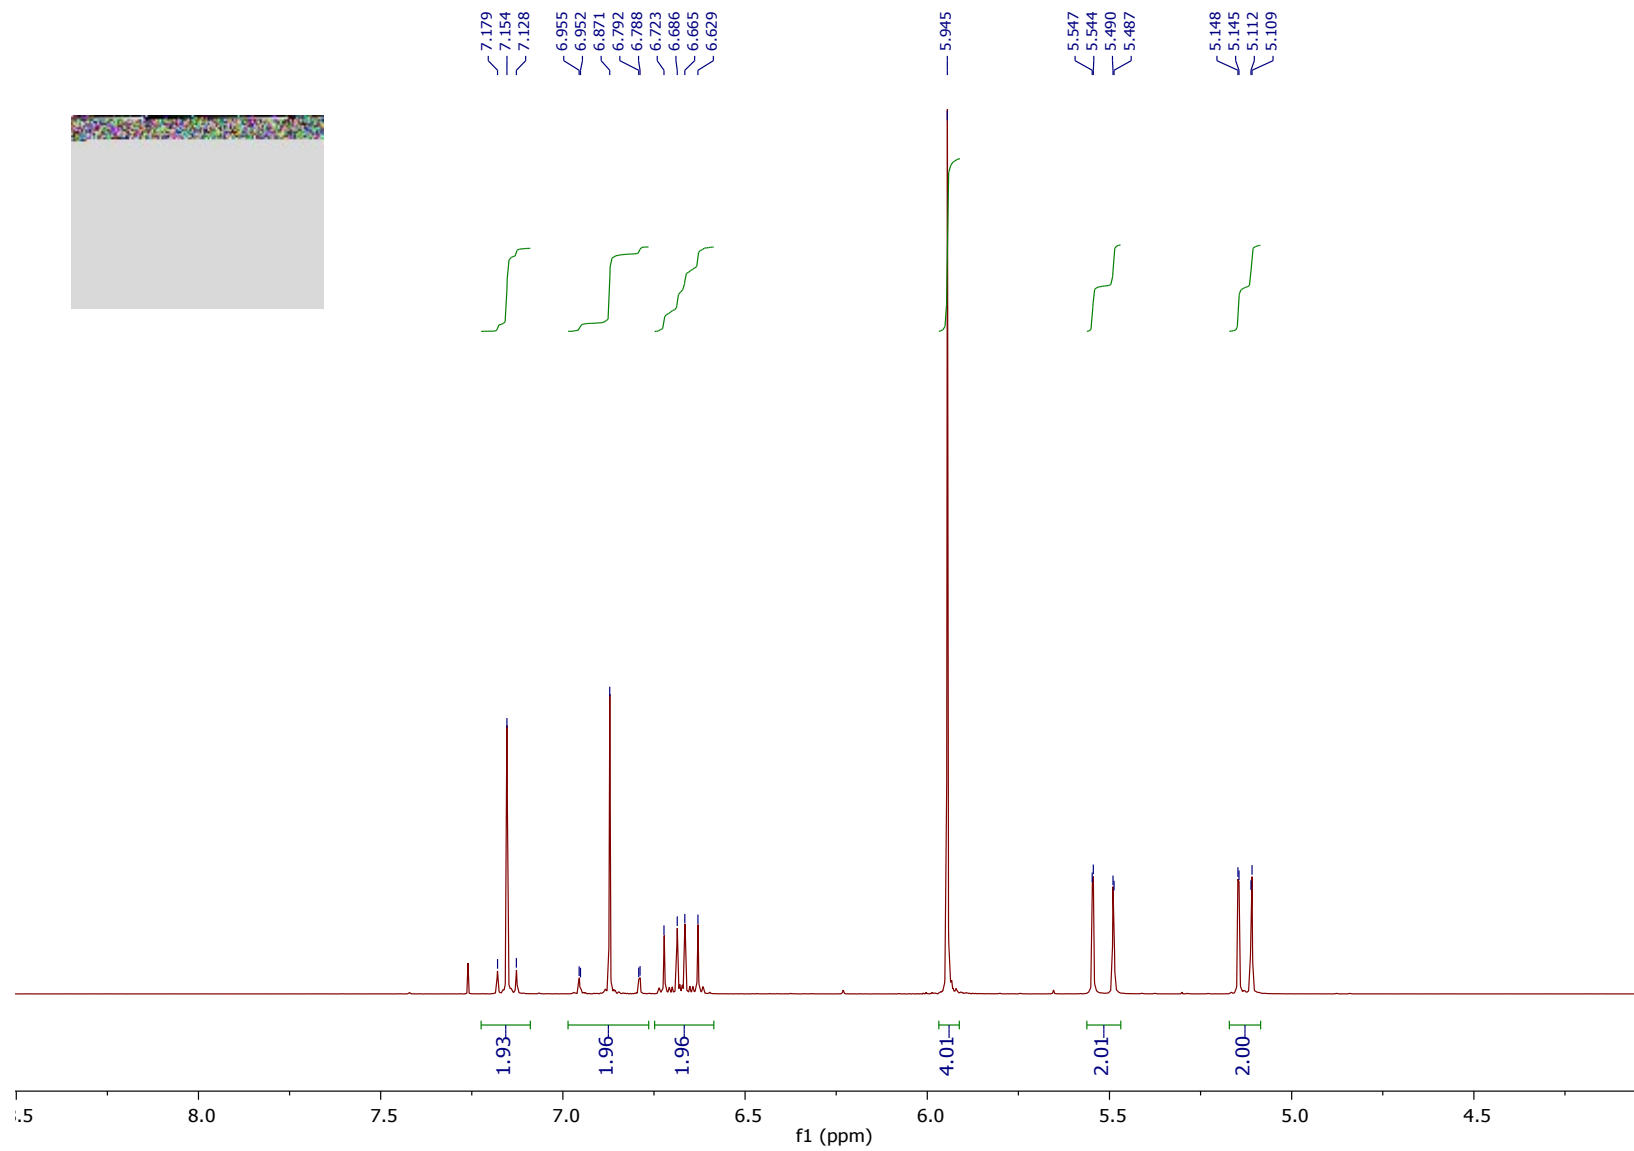

S-58

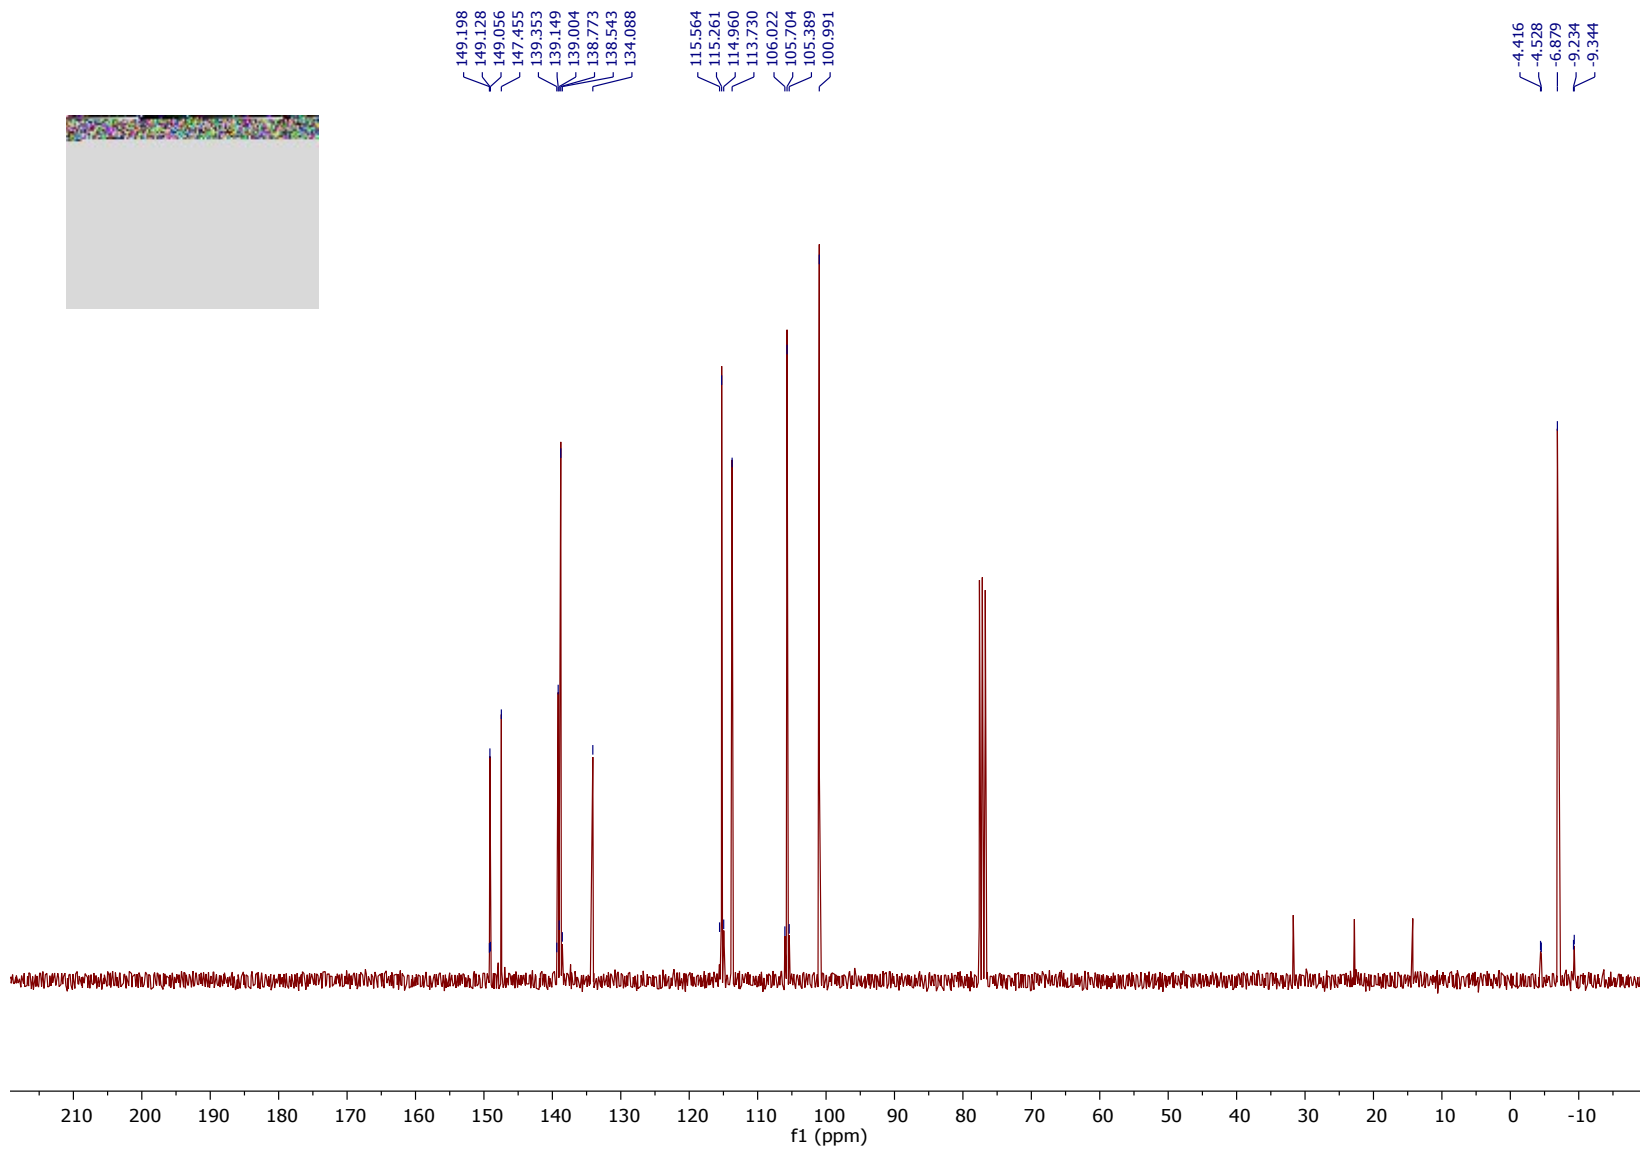

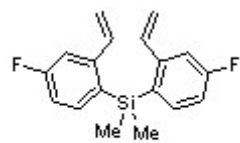

**24a**

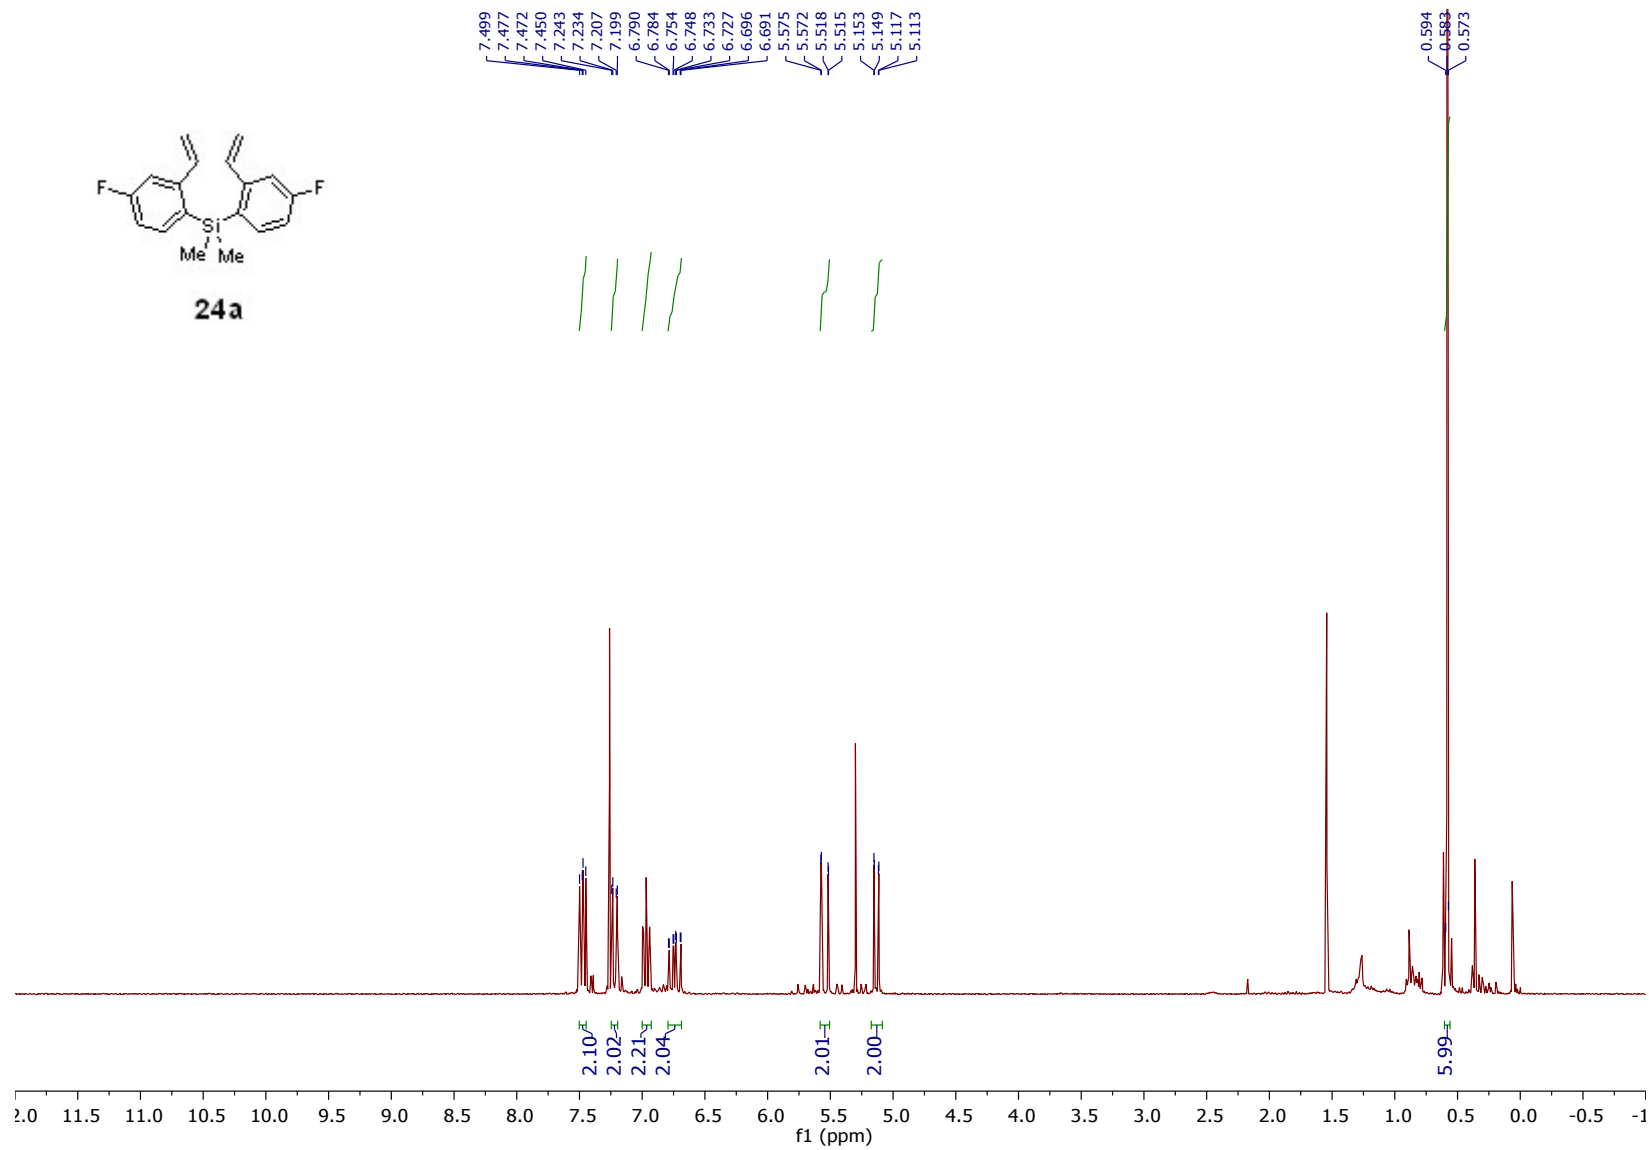

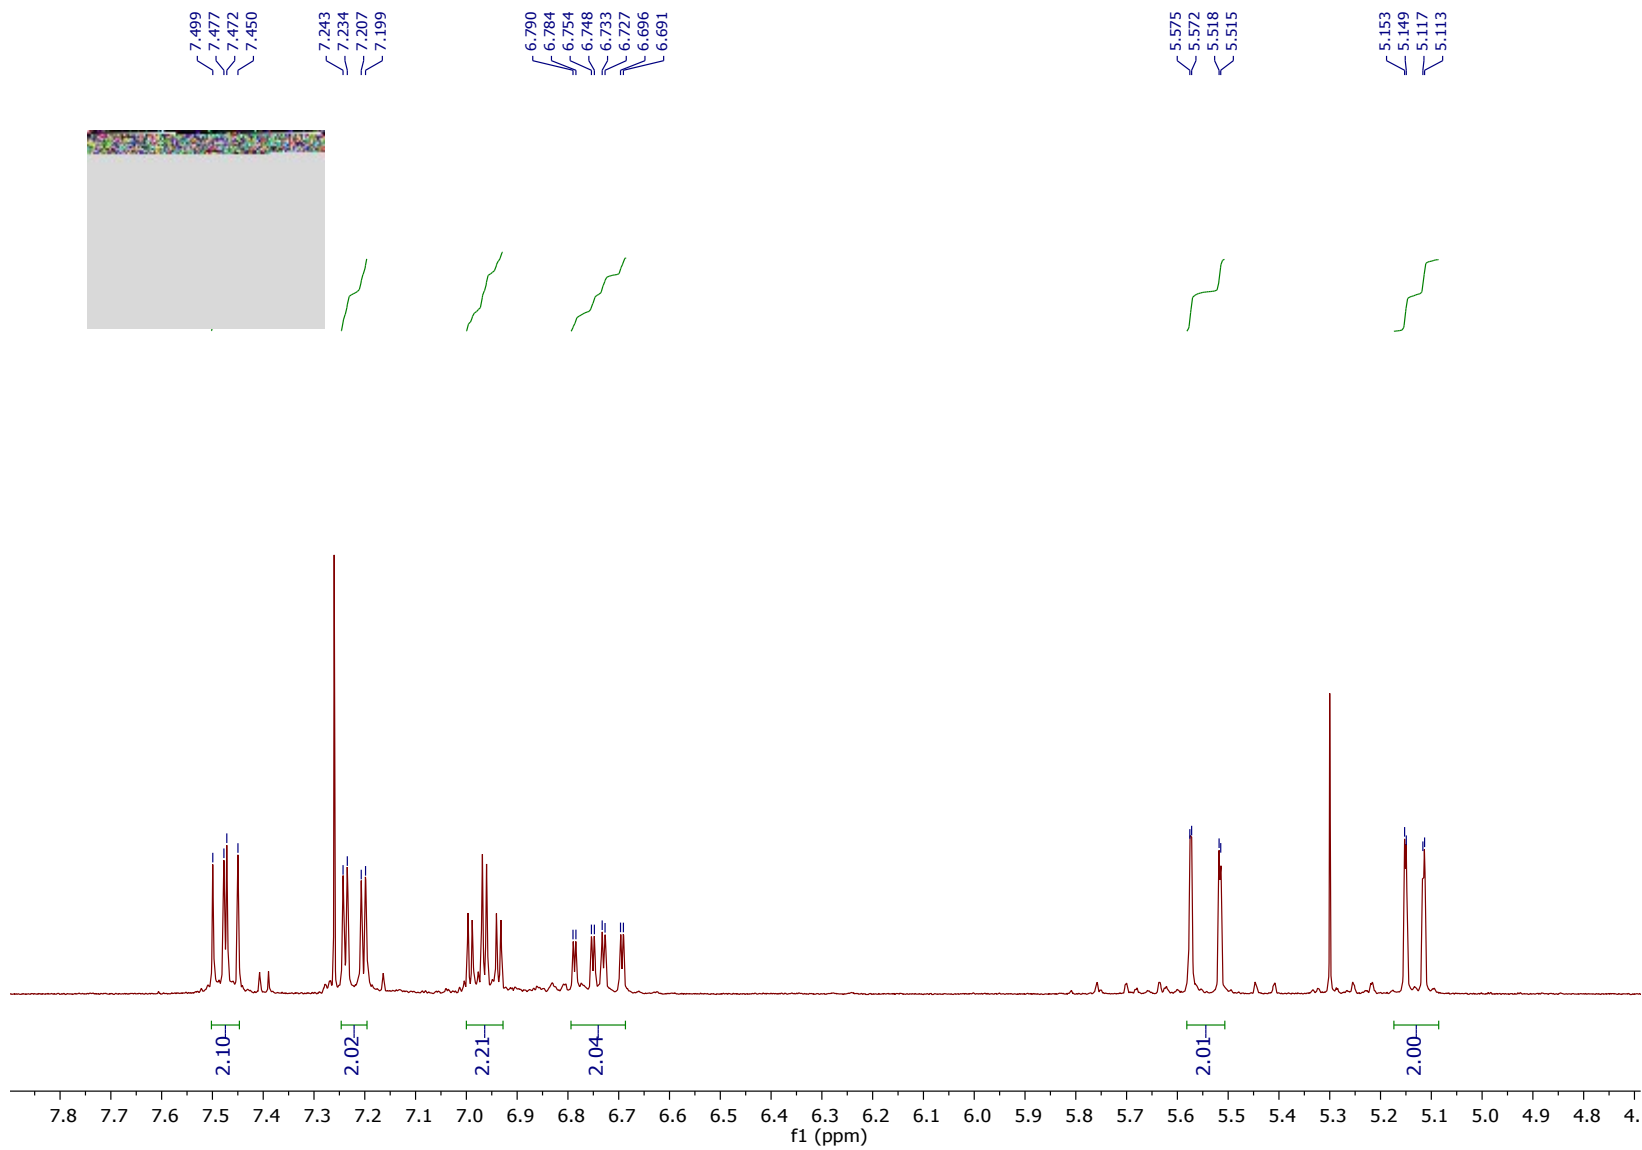

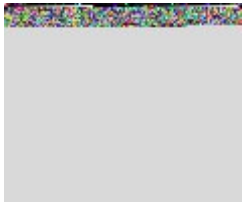

-112.432

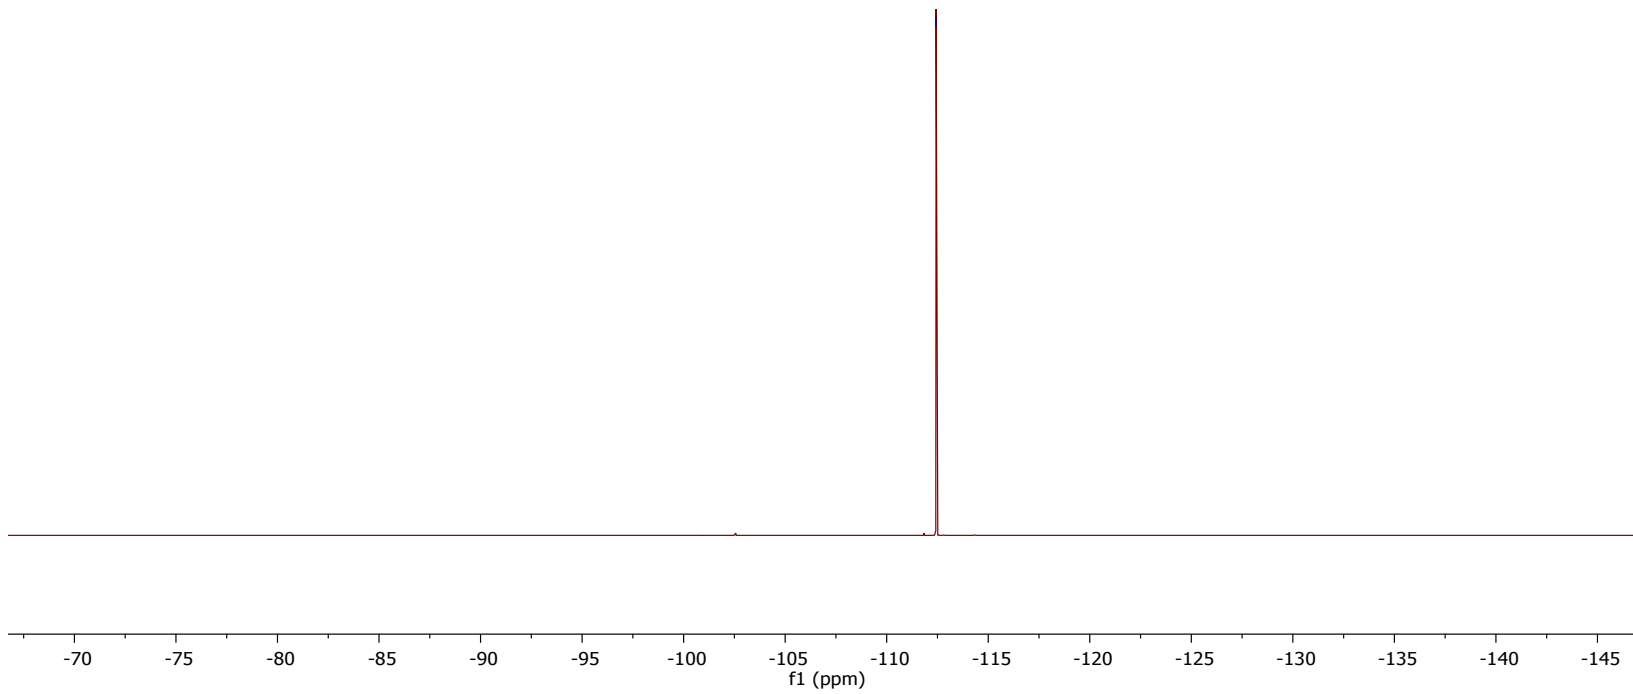

S-62

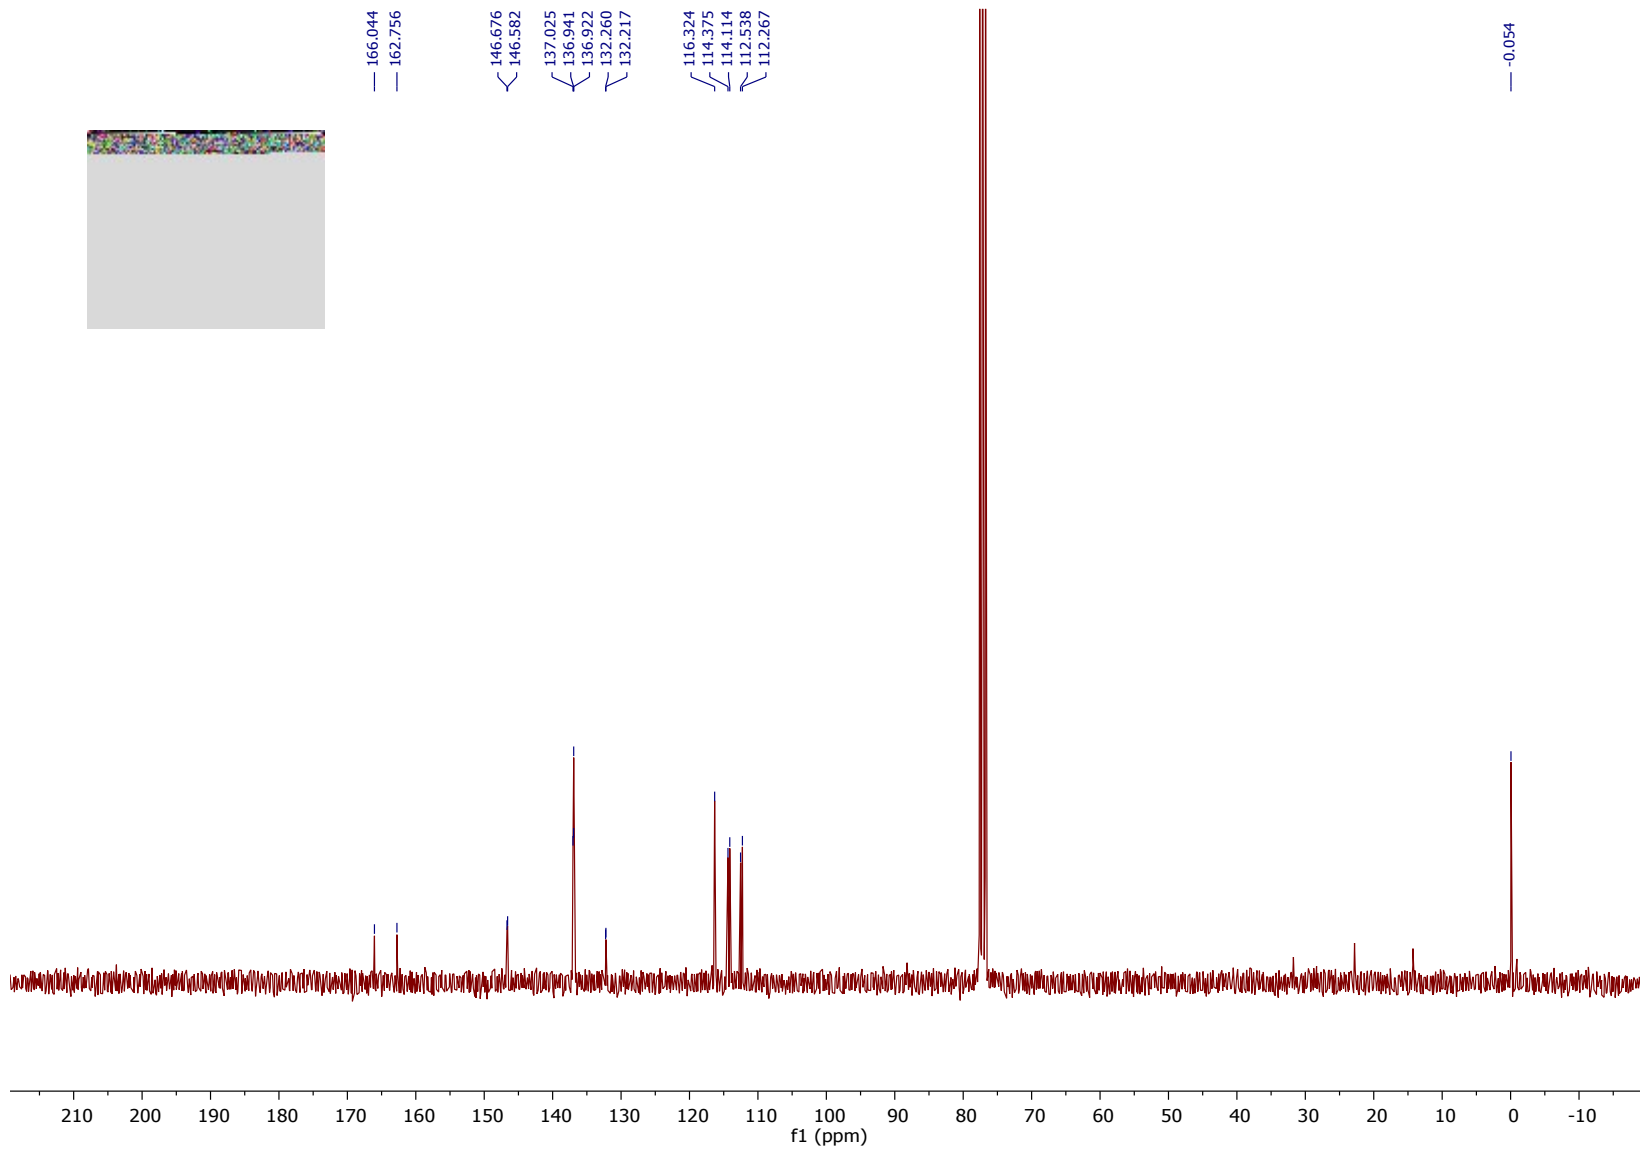

S-63

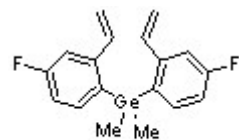

**24b**

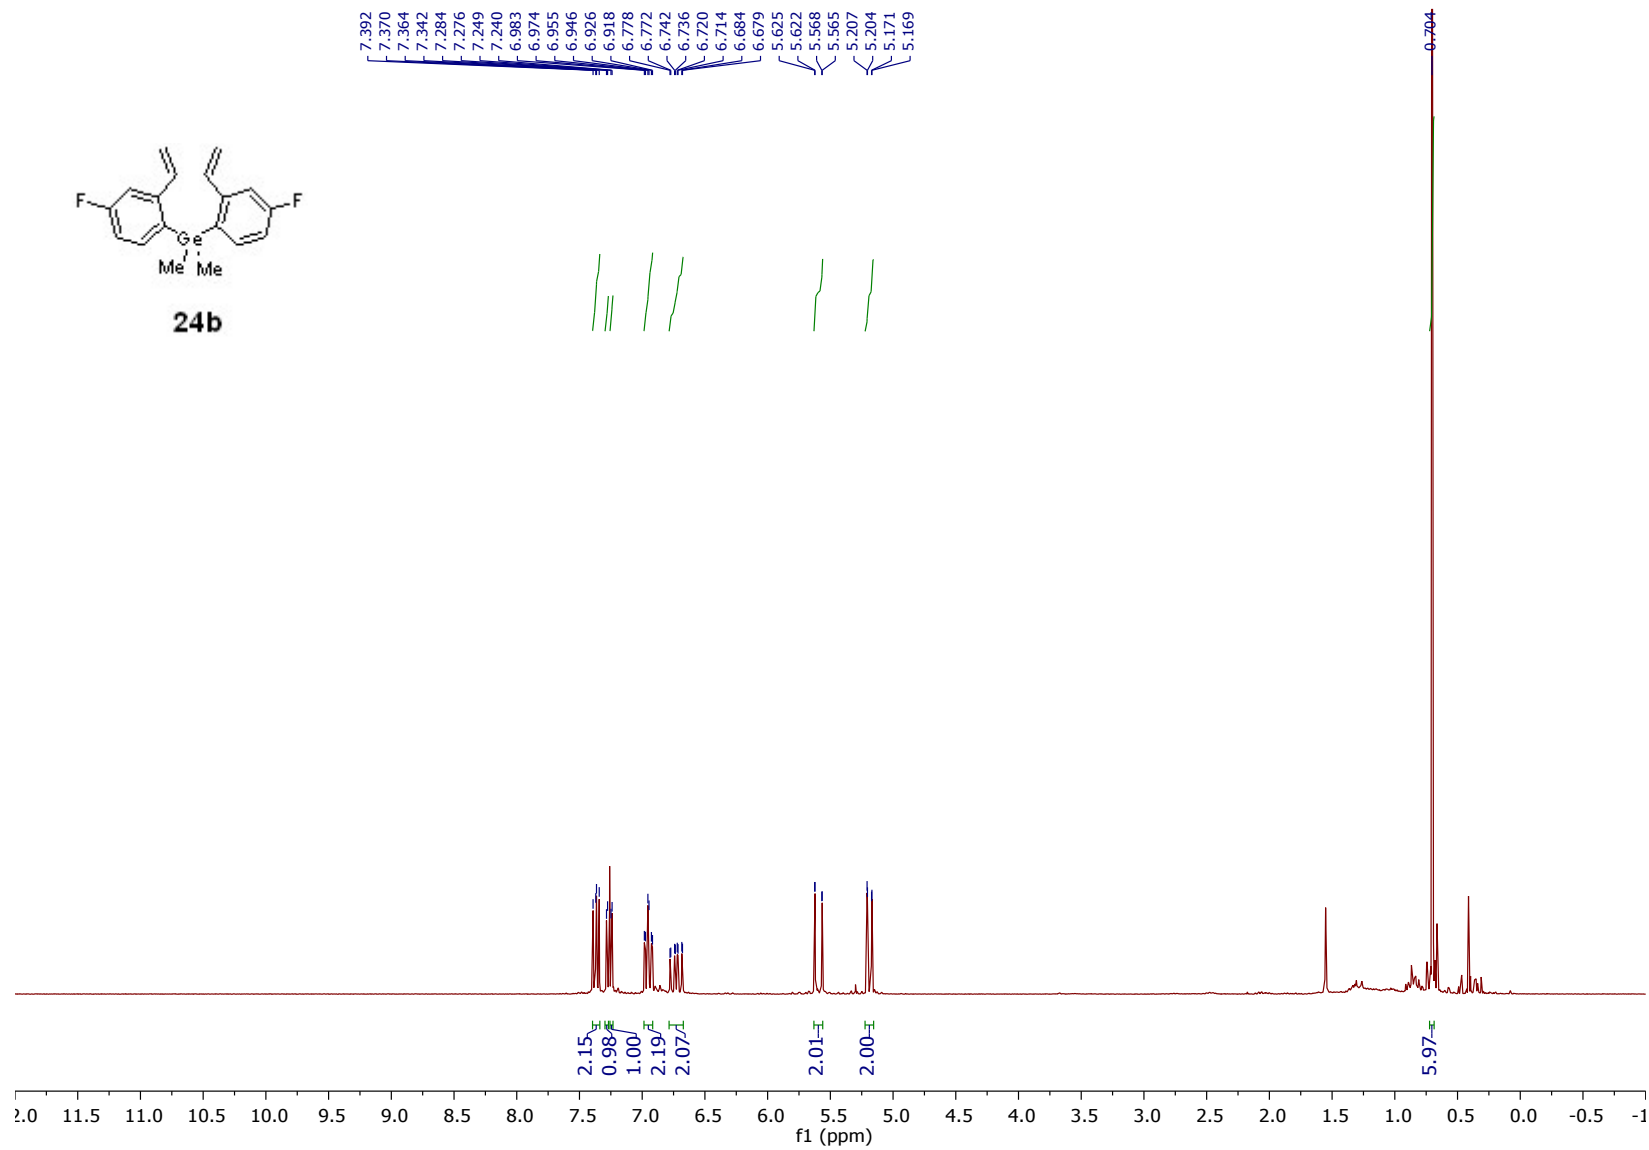



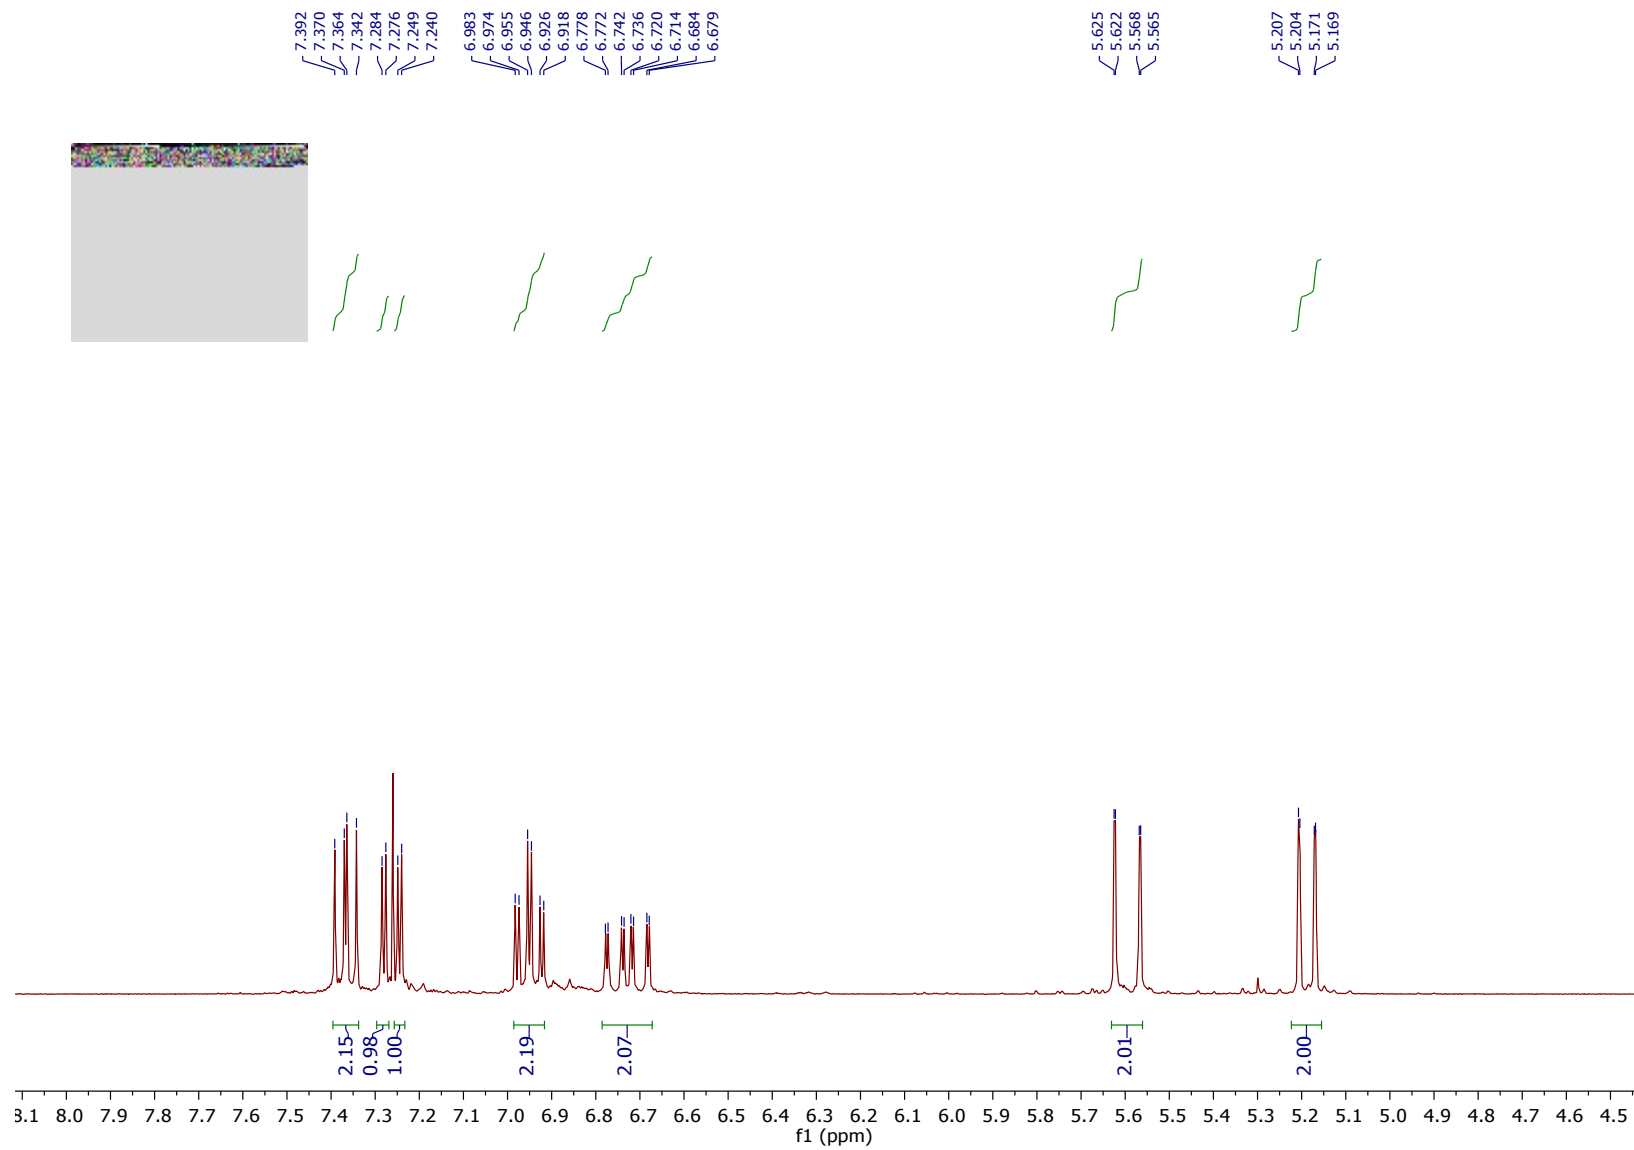

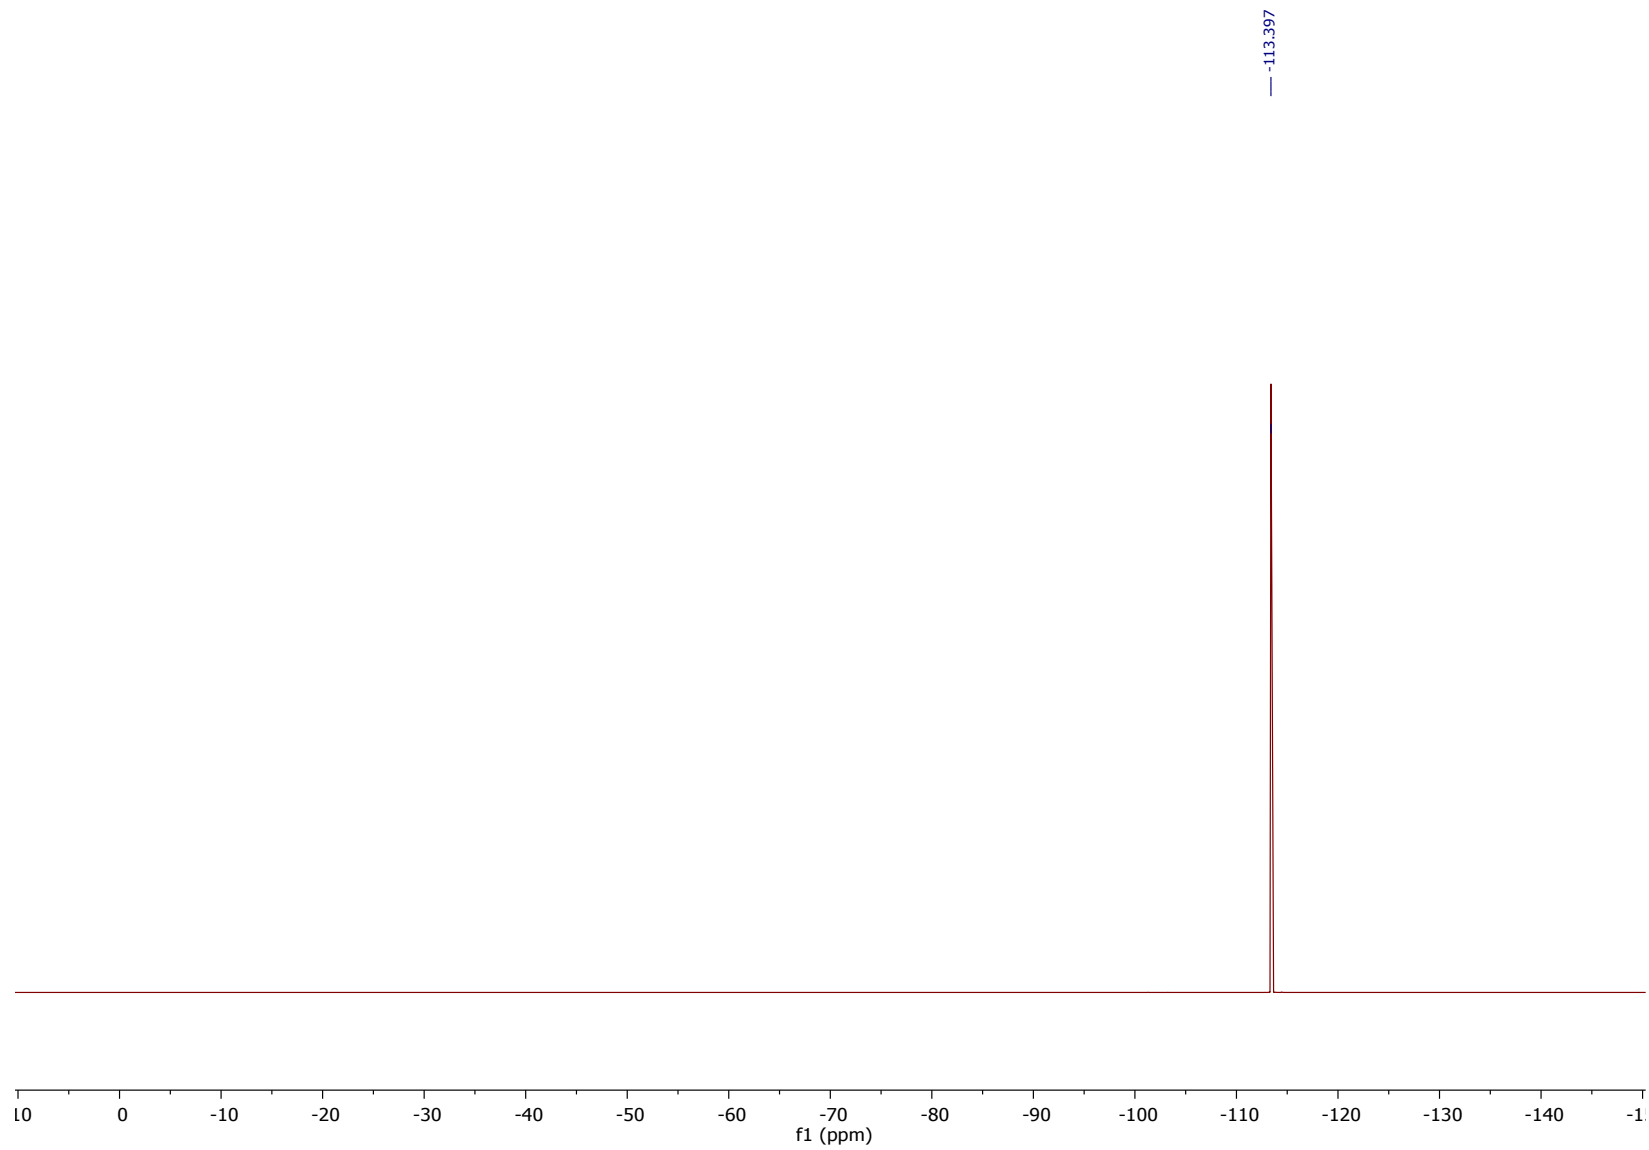

S-66

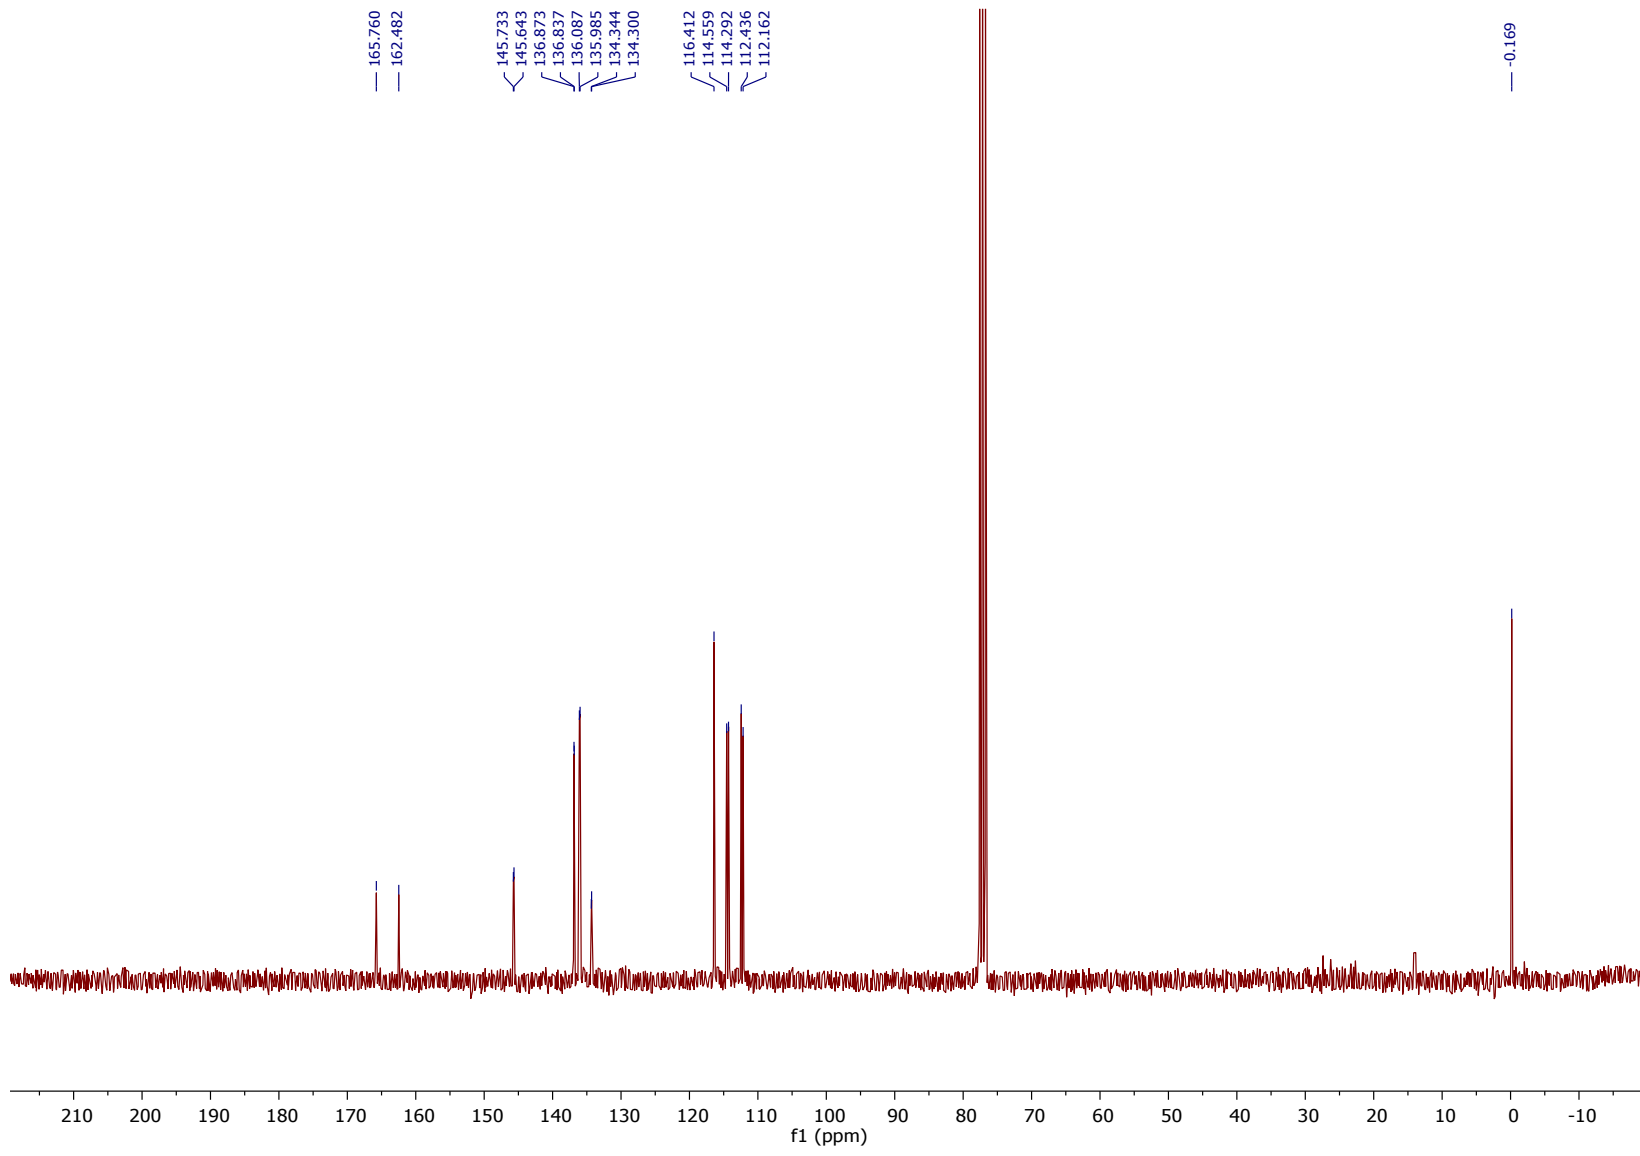

S-67

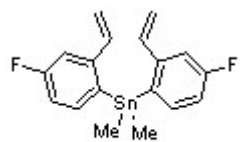

24c

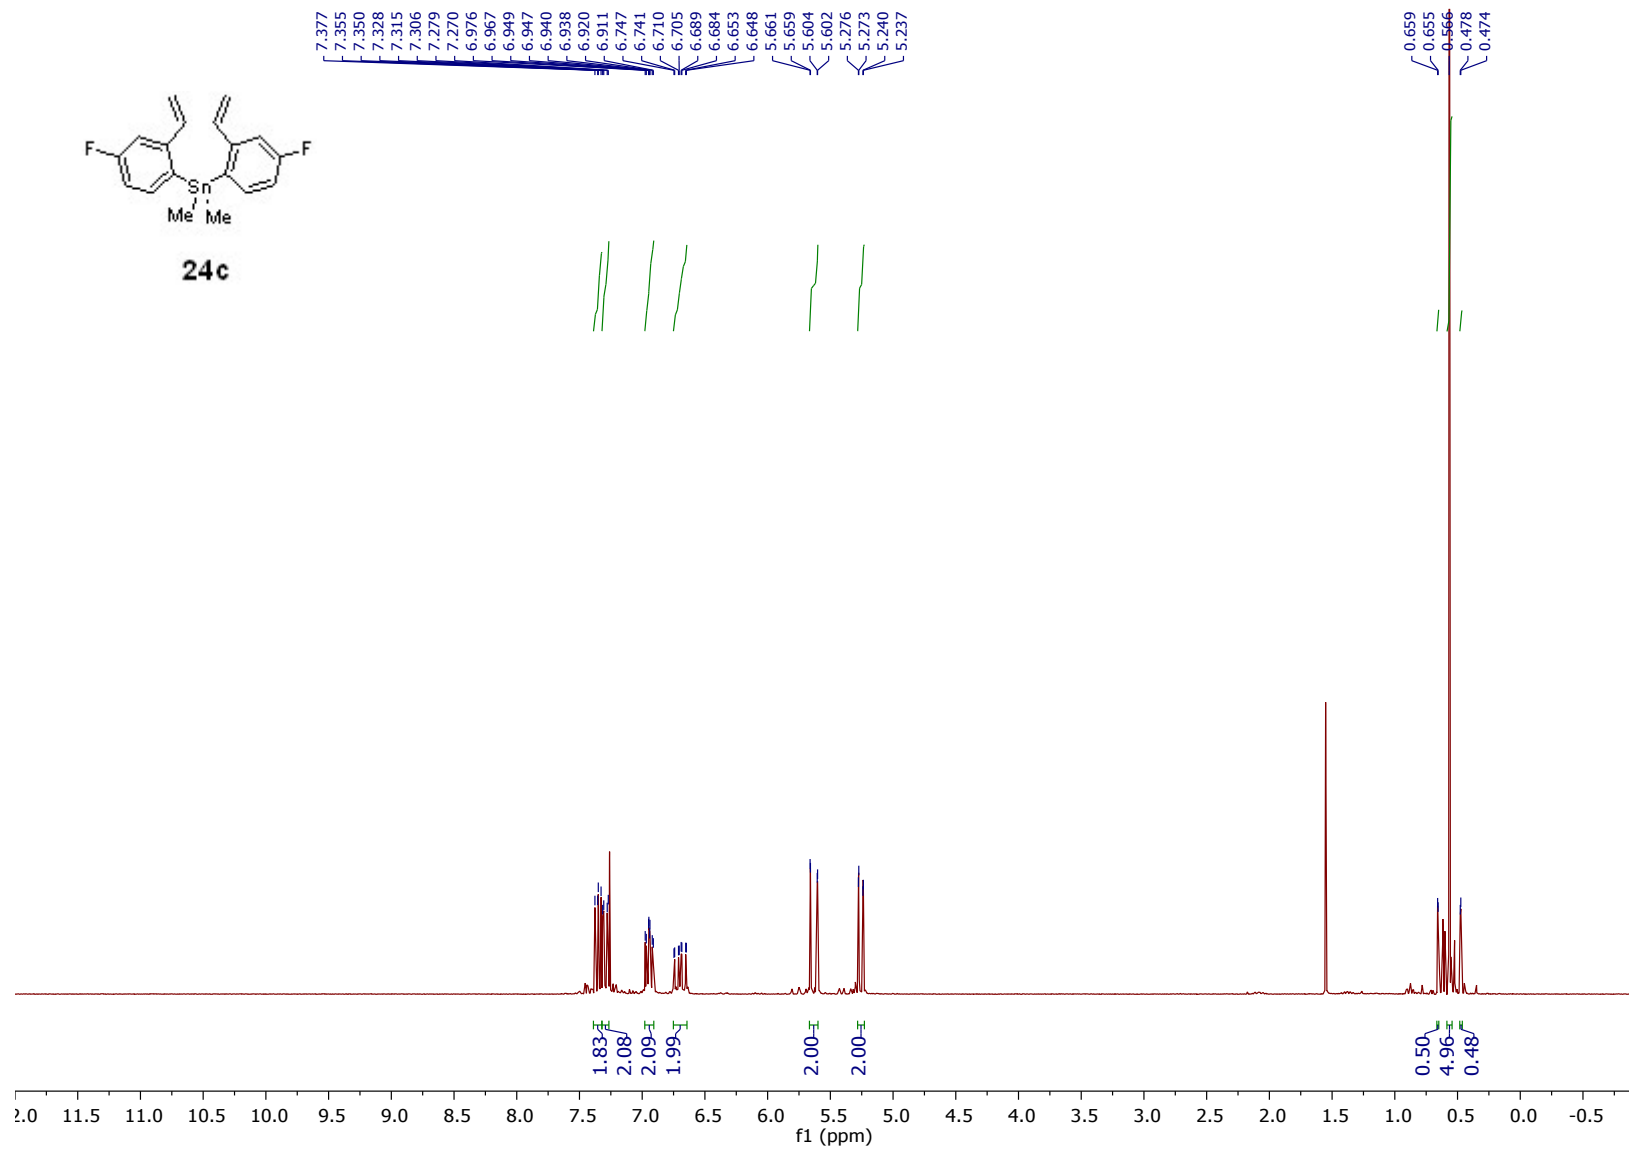

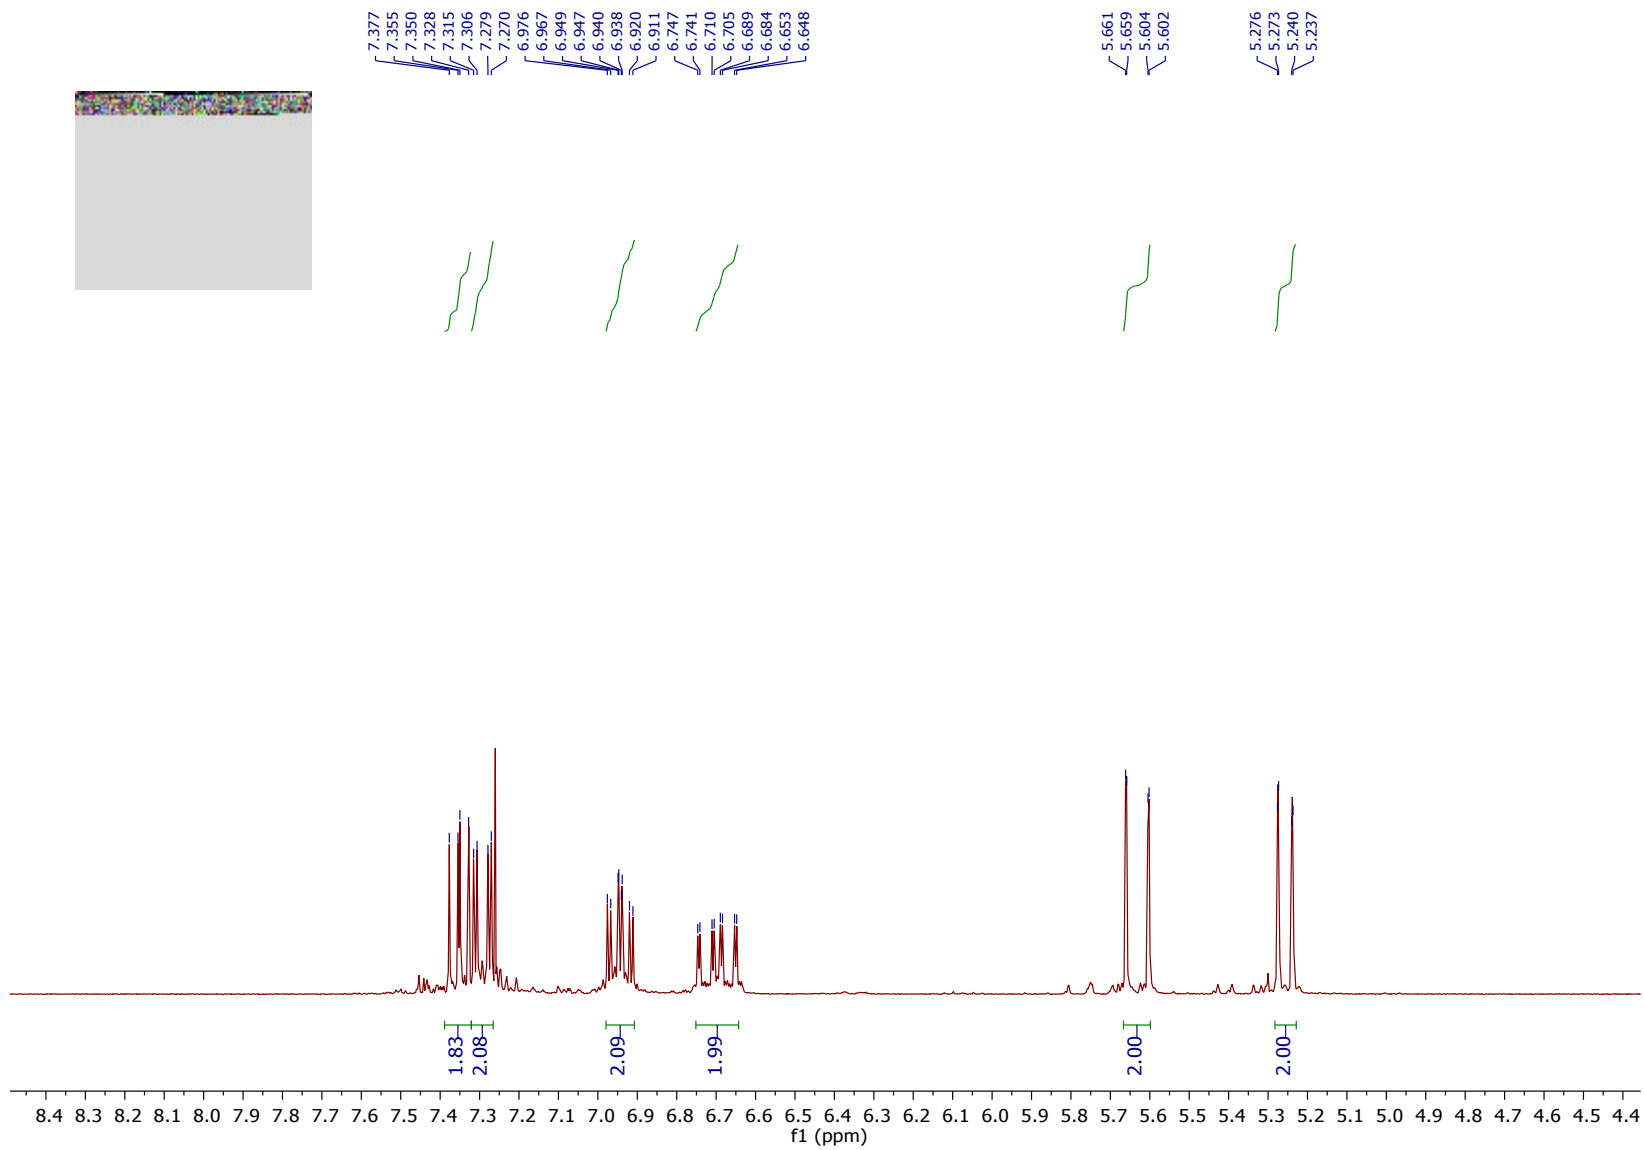

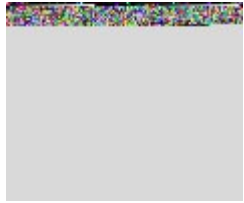

-113.333  
-113.347  
-113.361

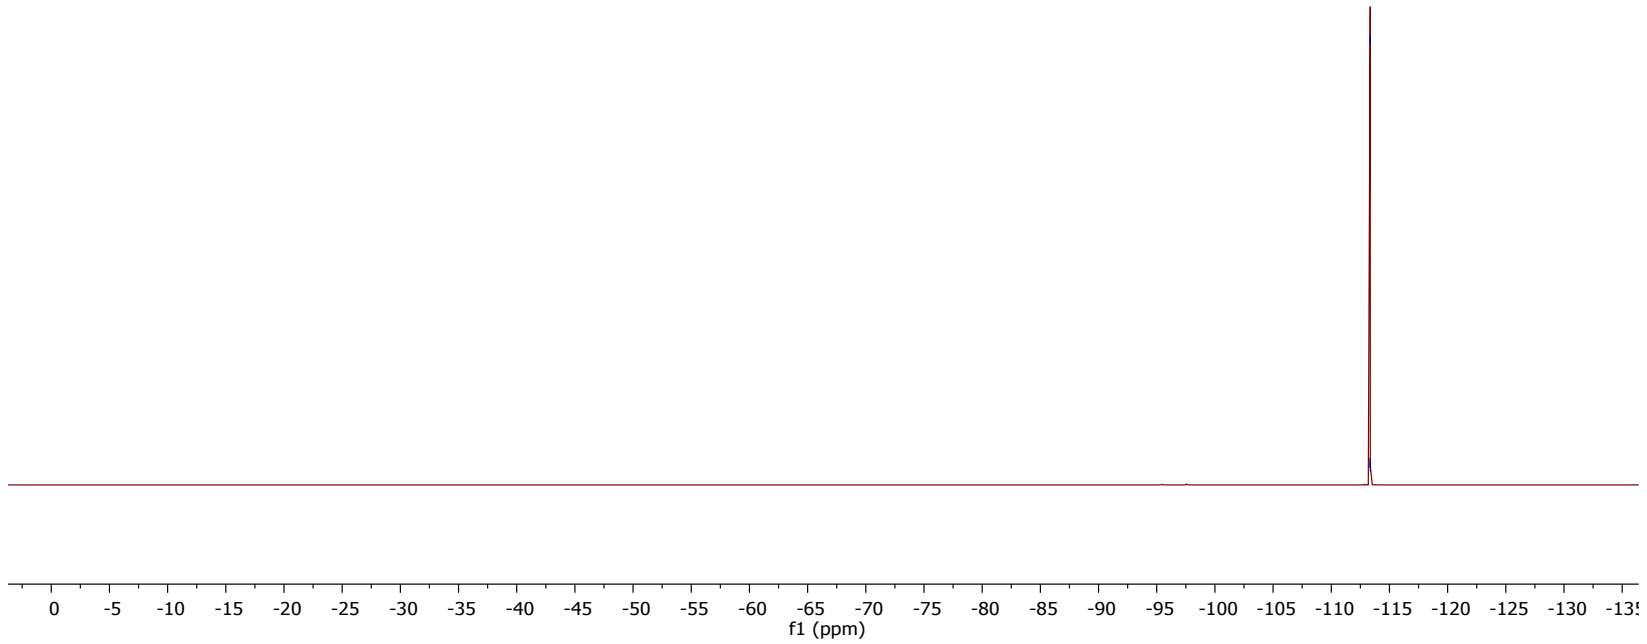

S-70

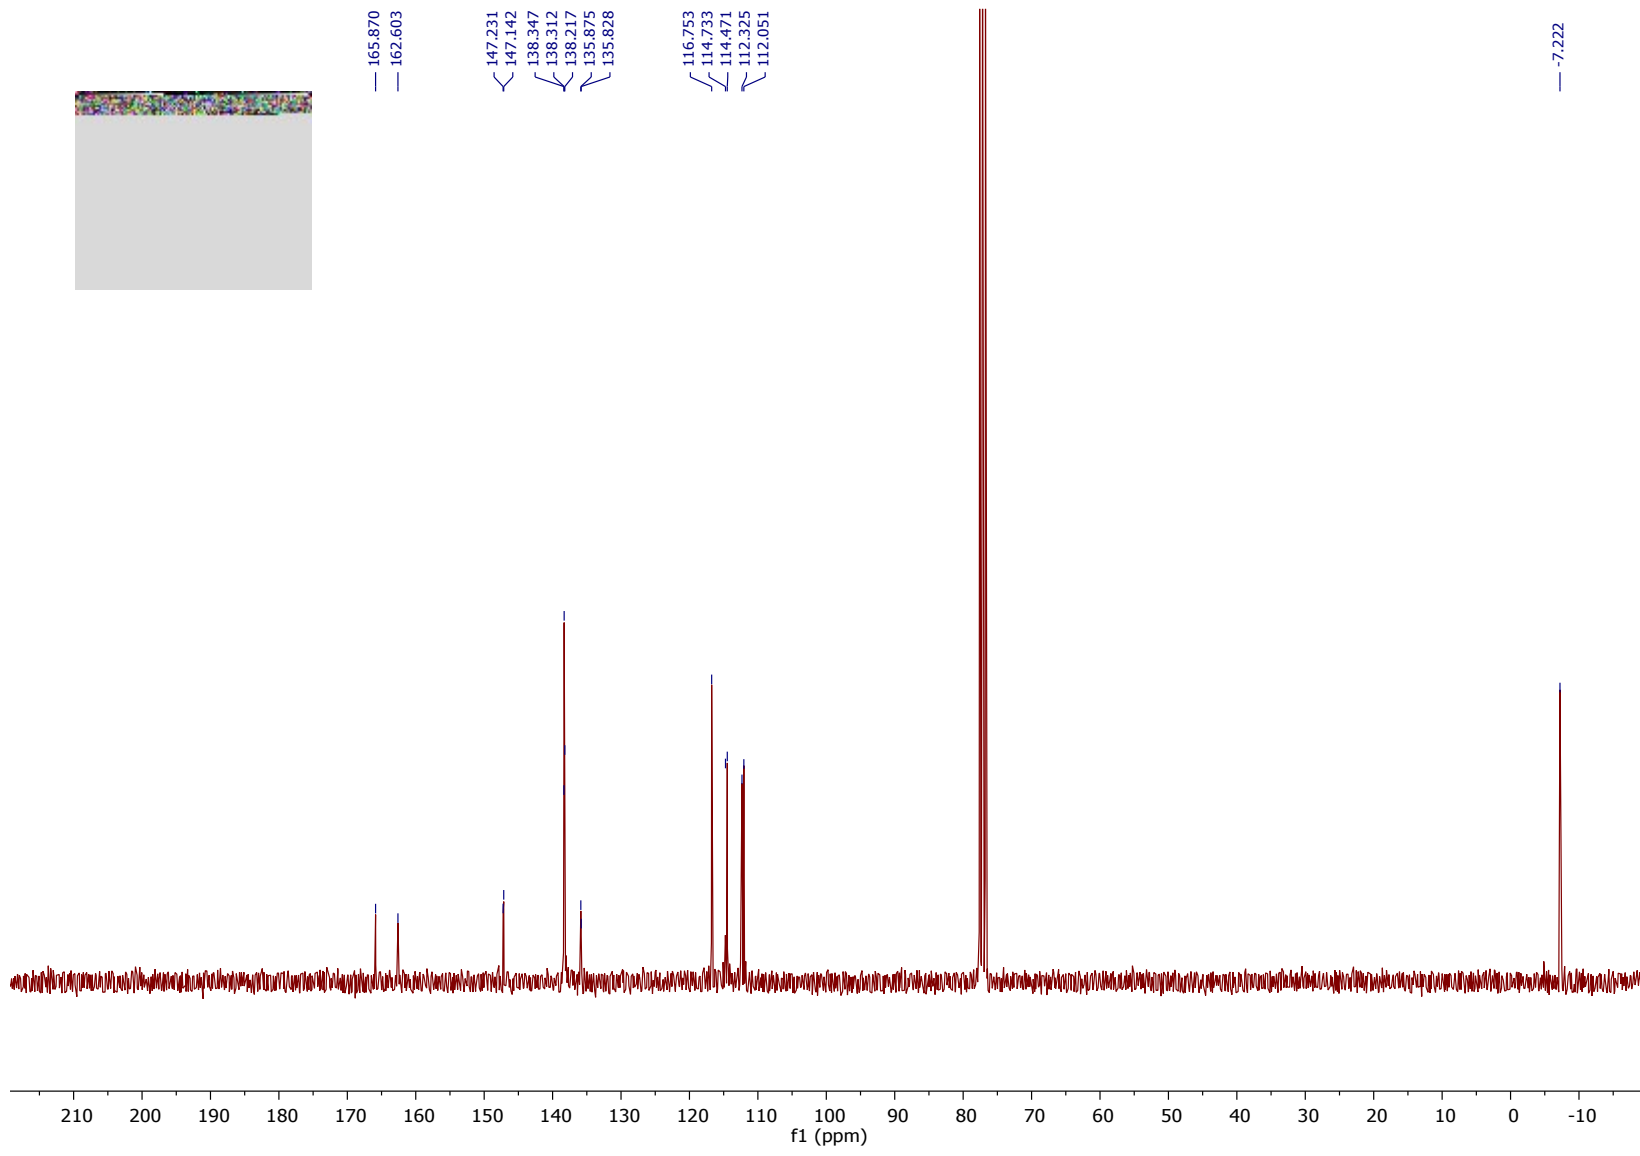

S-71

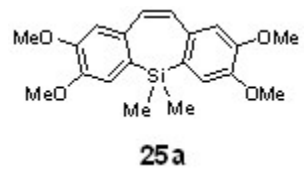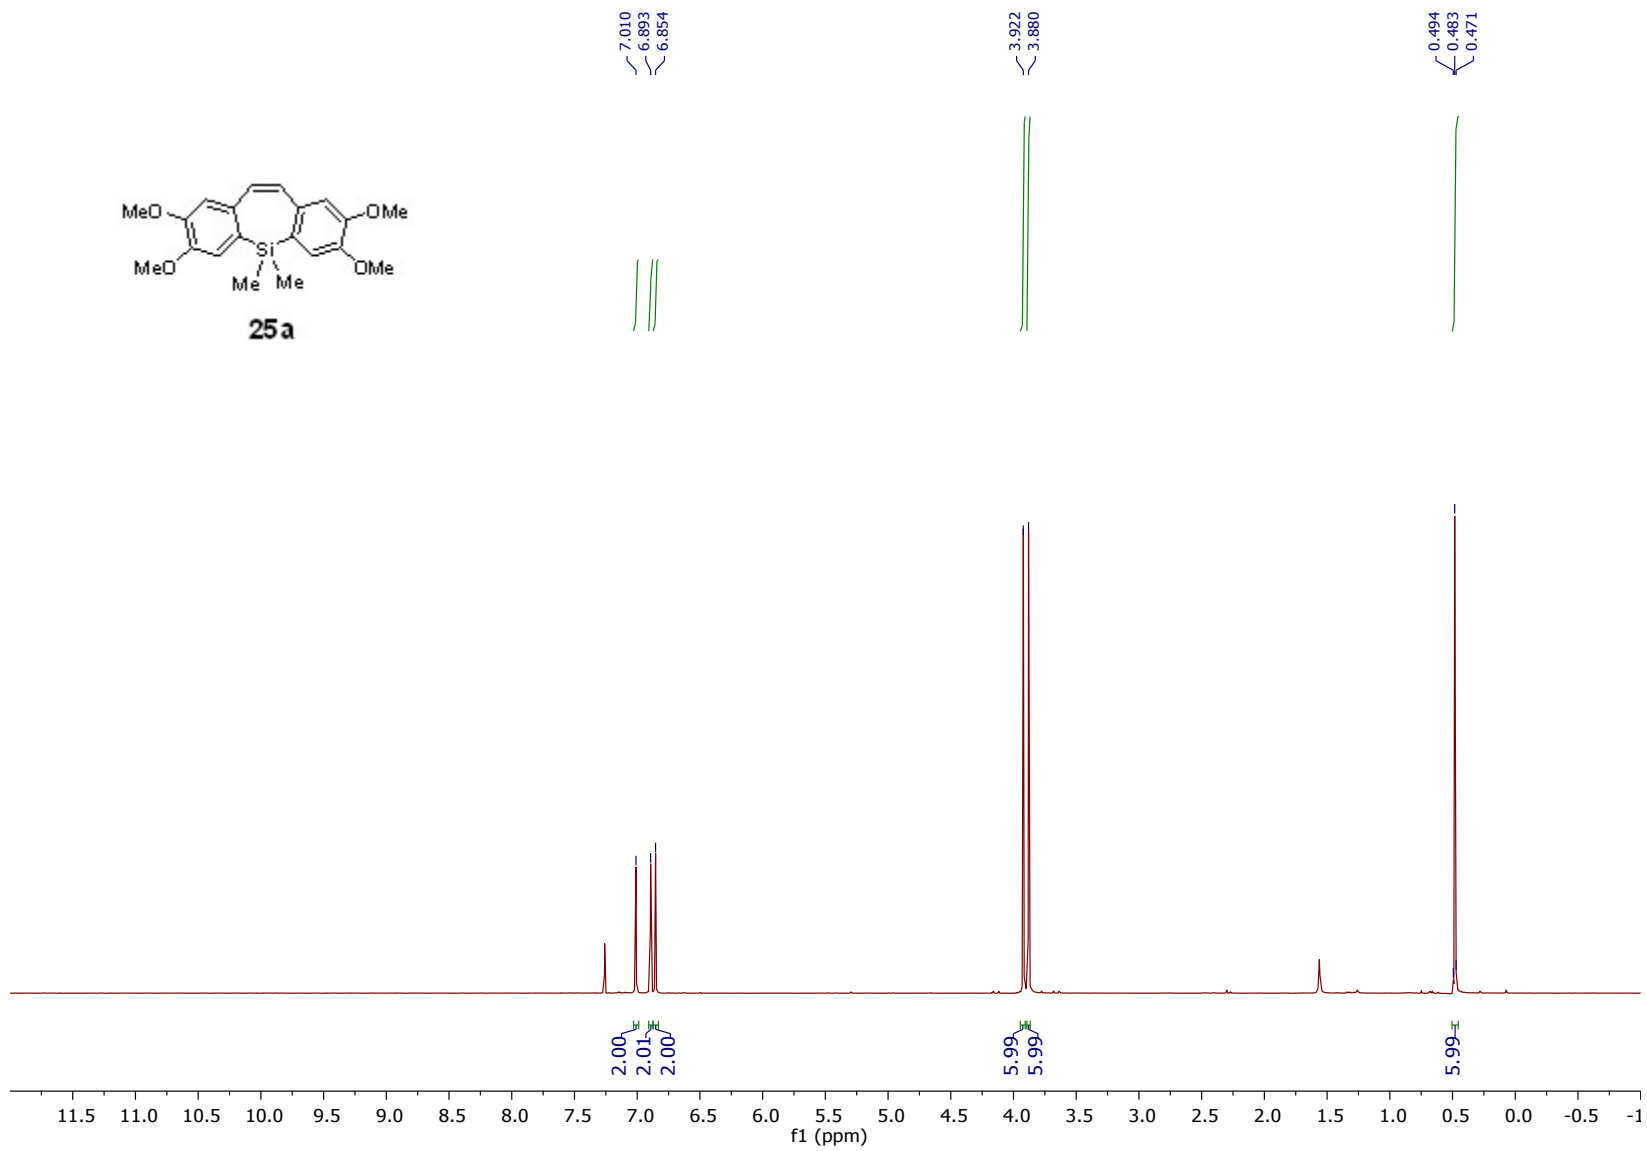



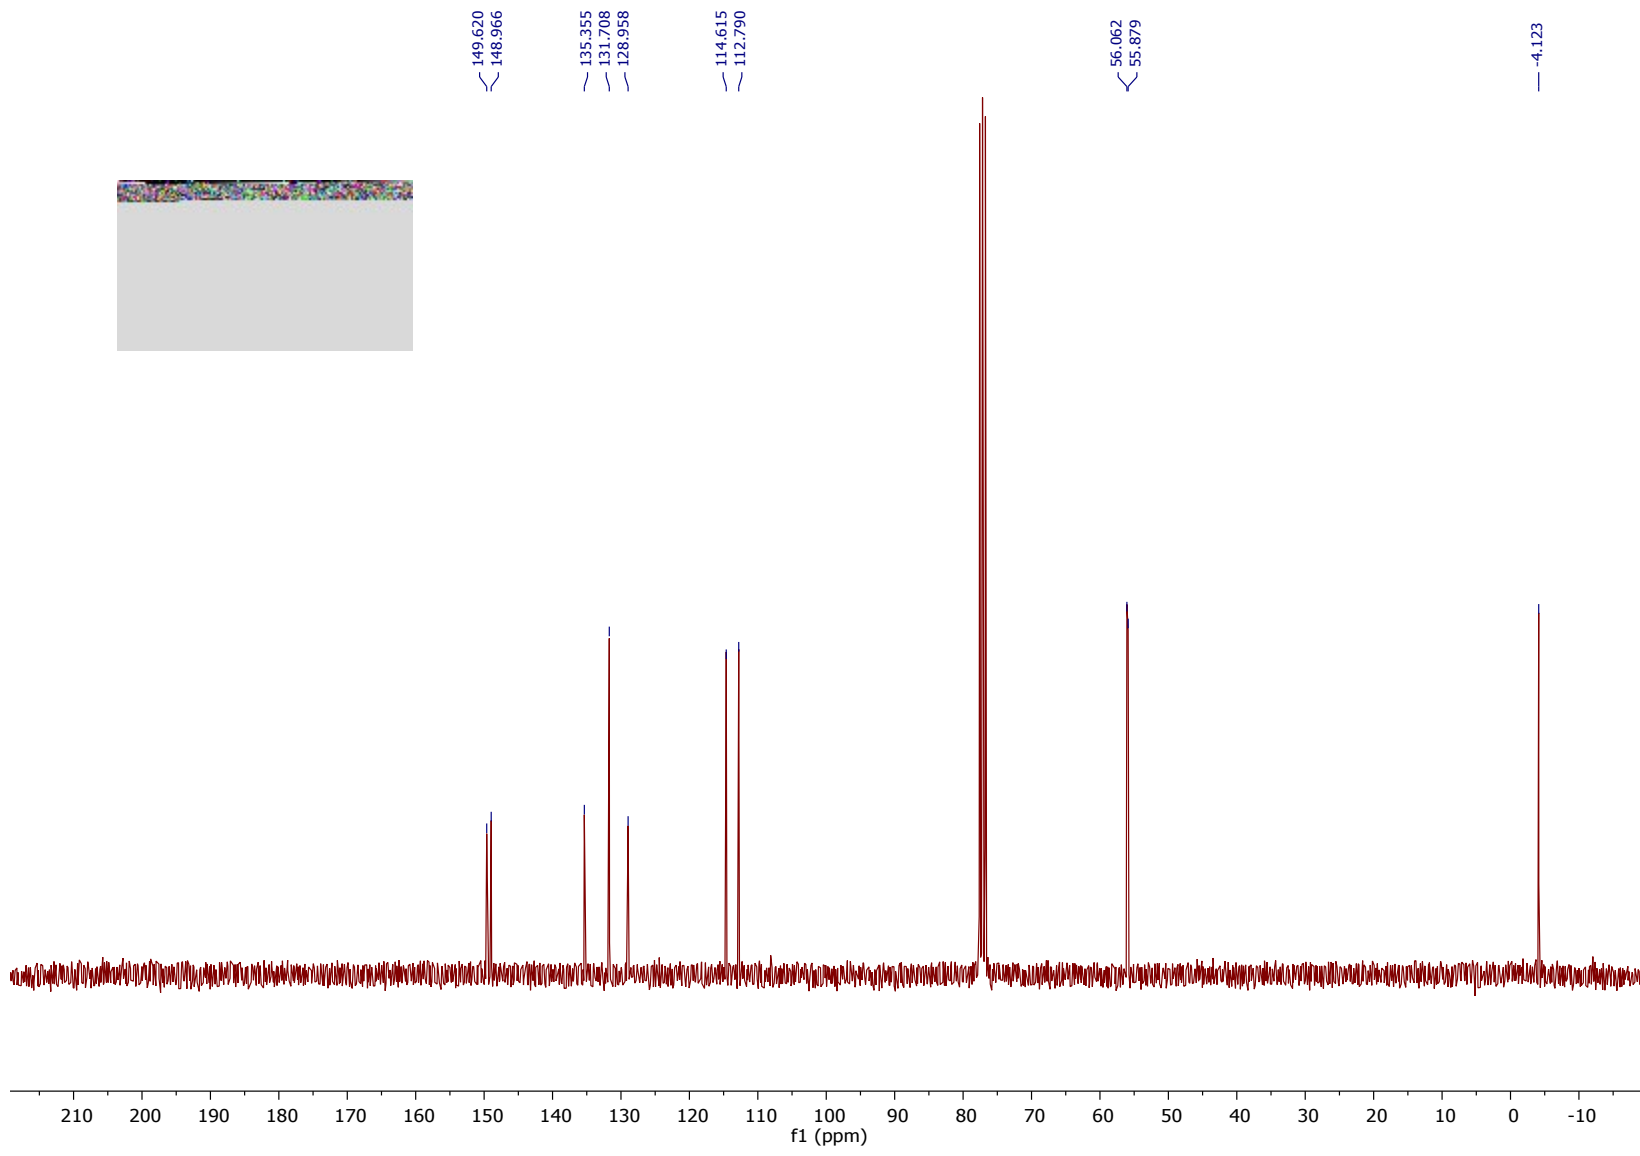

S-73

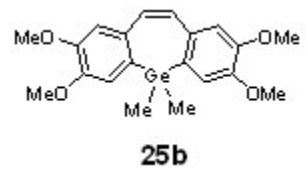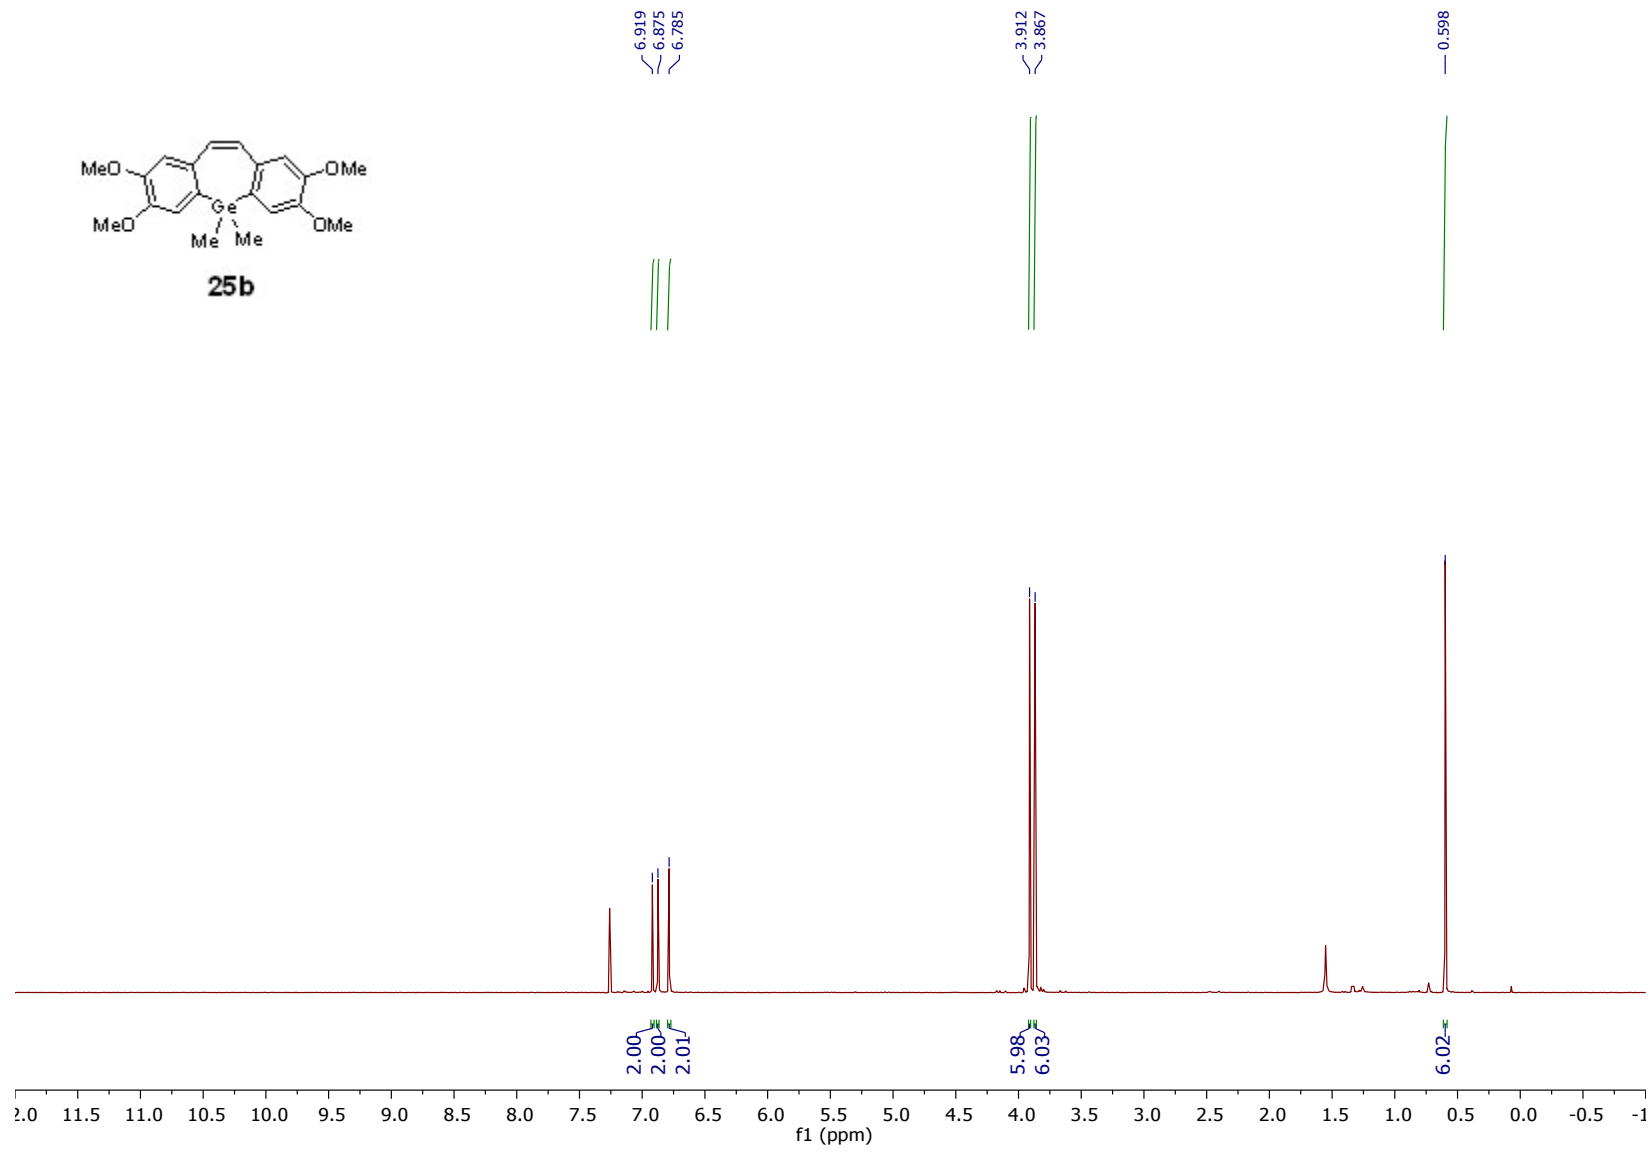

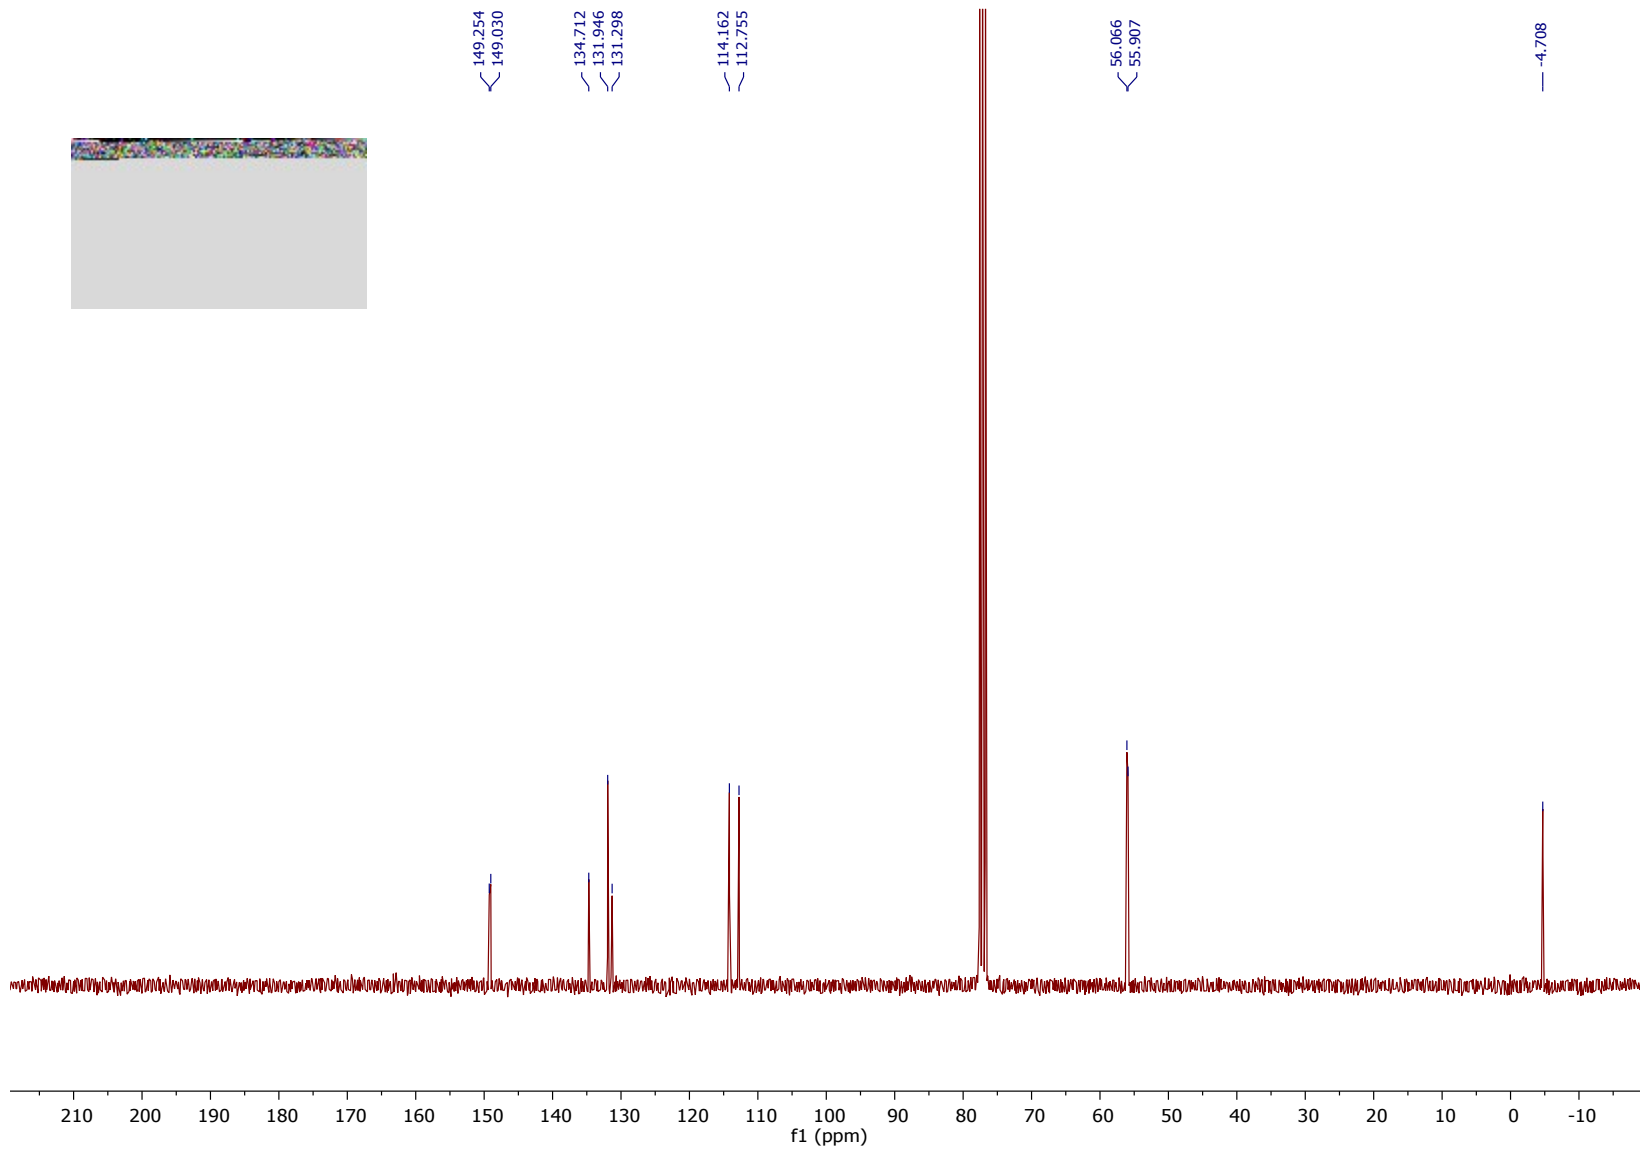

S-75

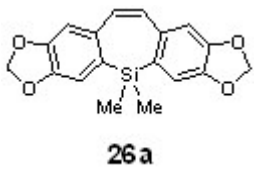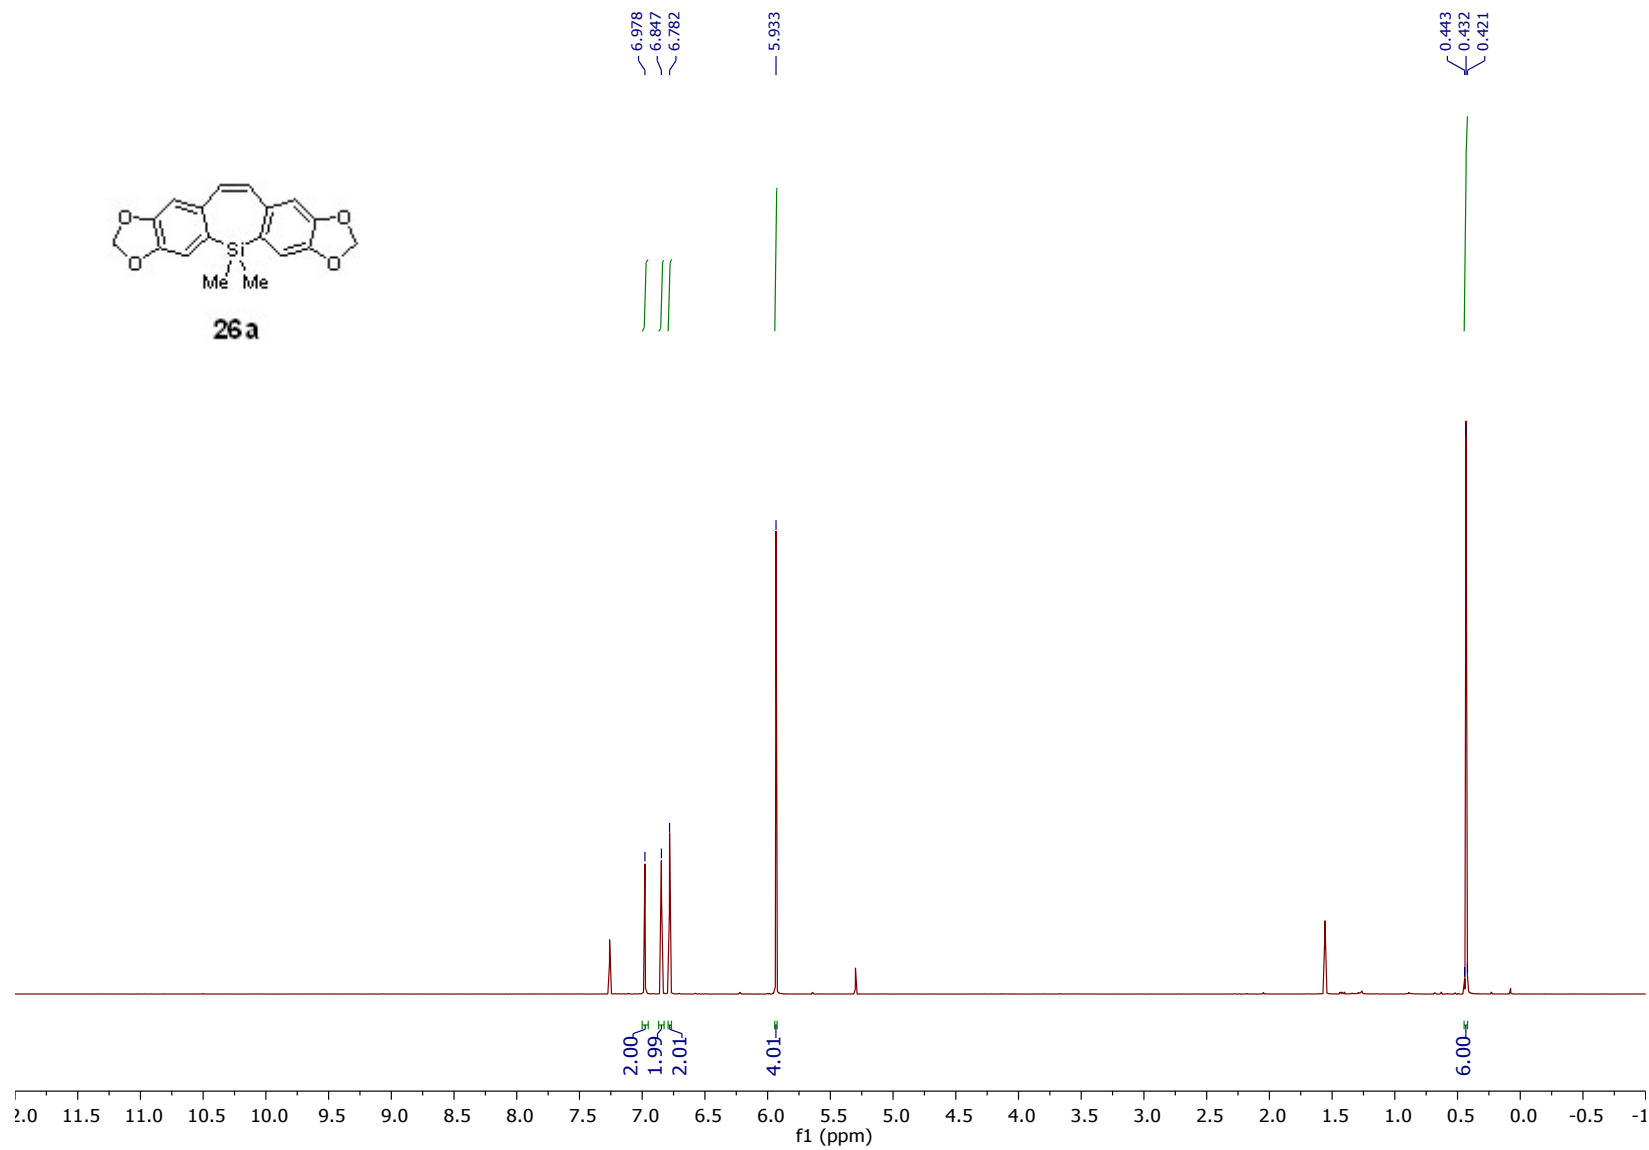

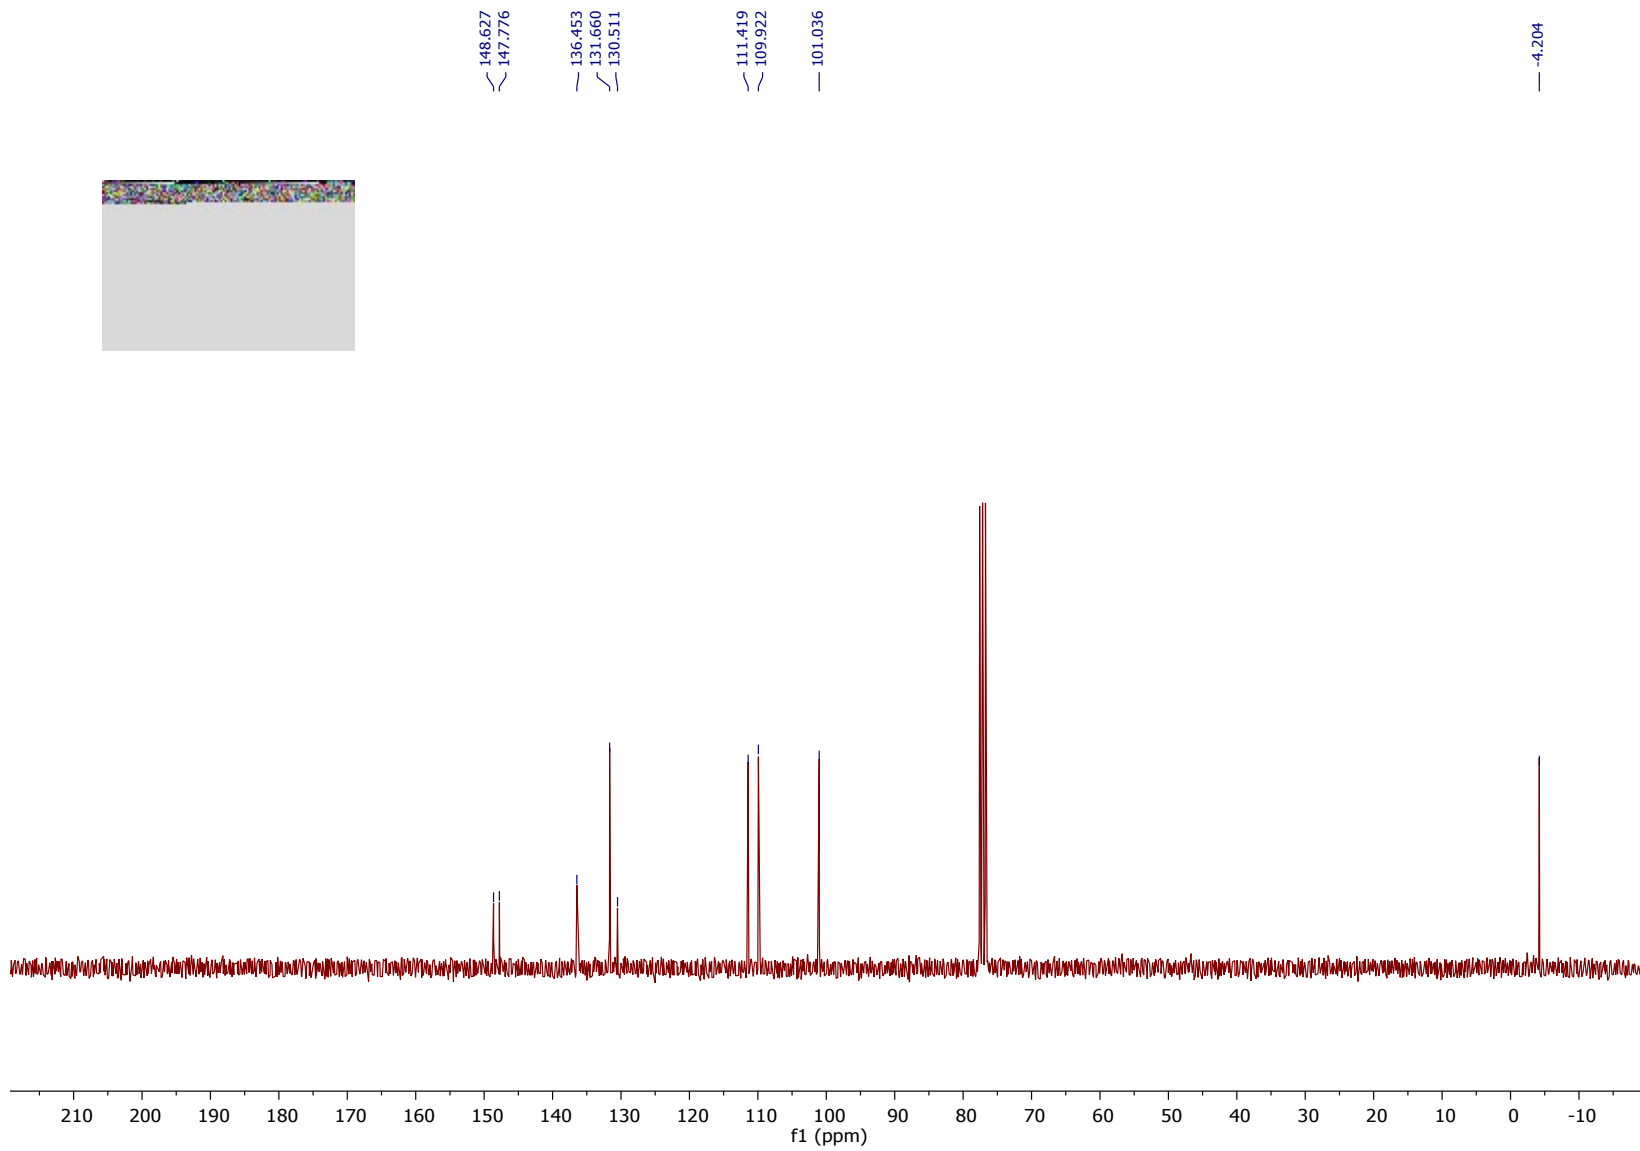

S-77

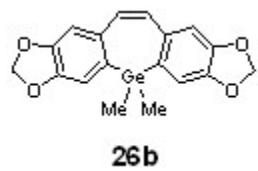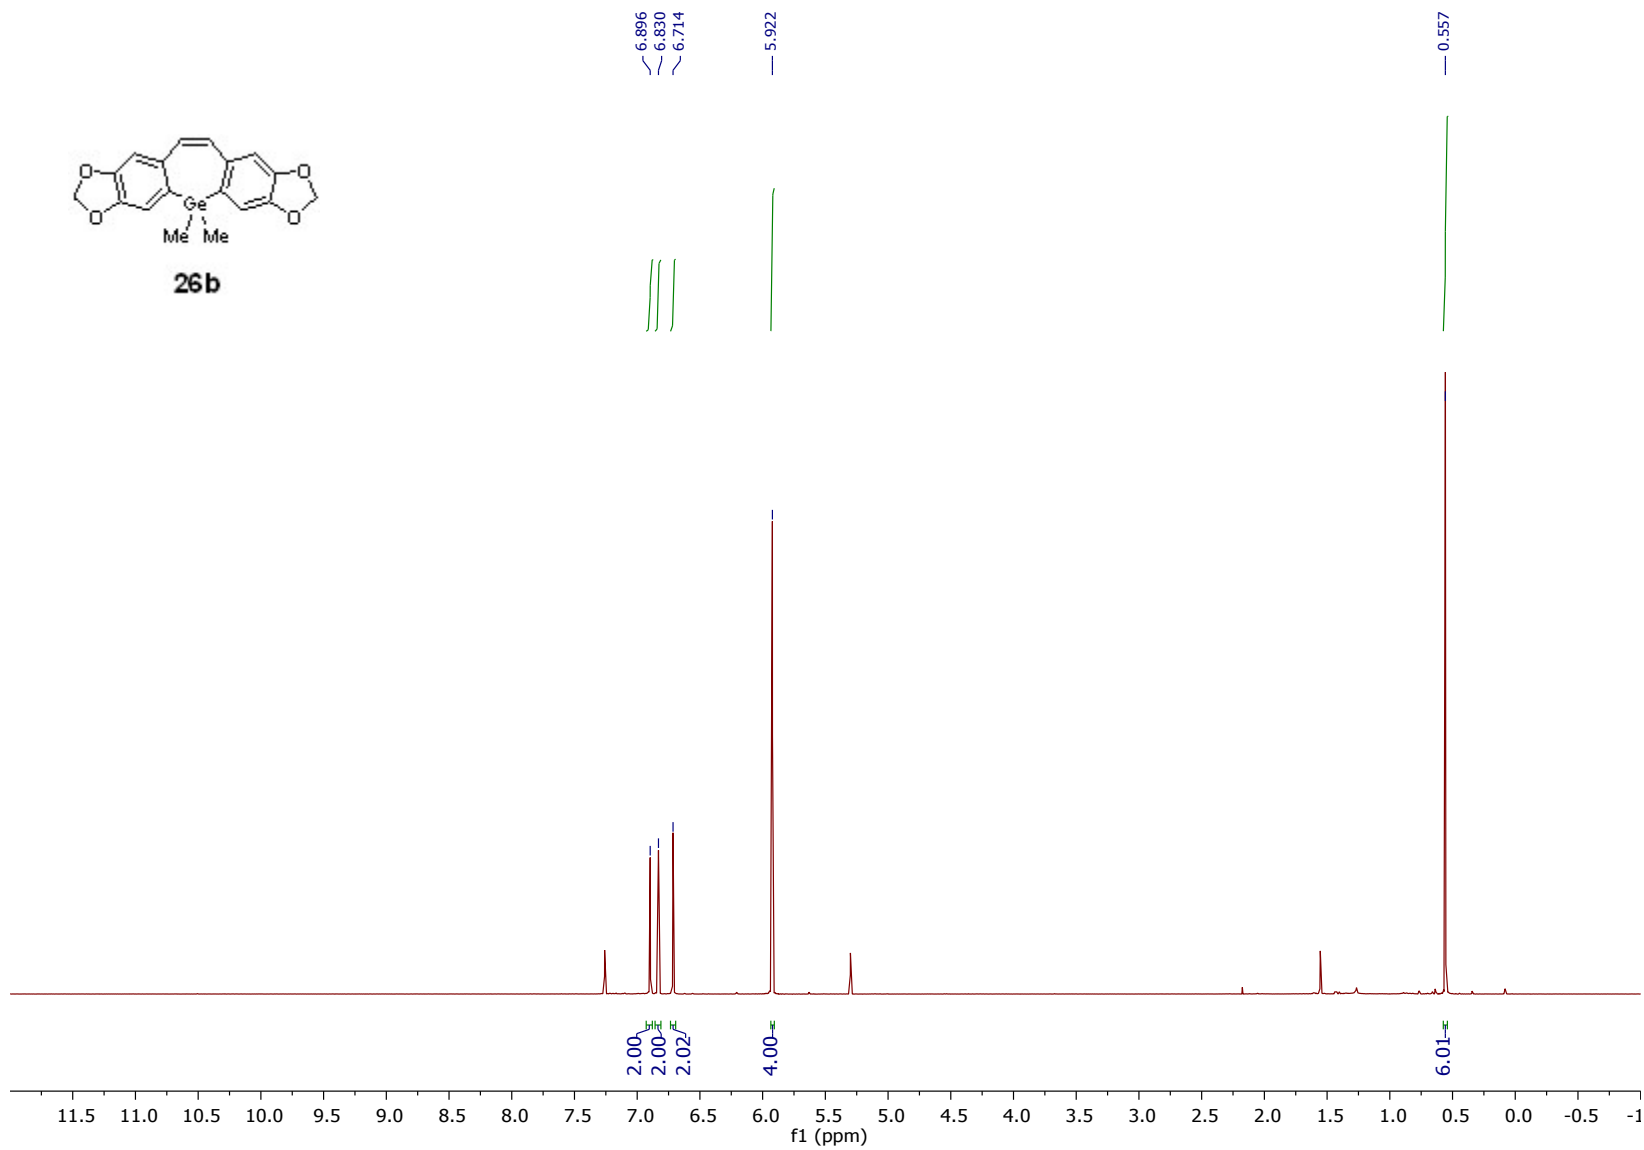

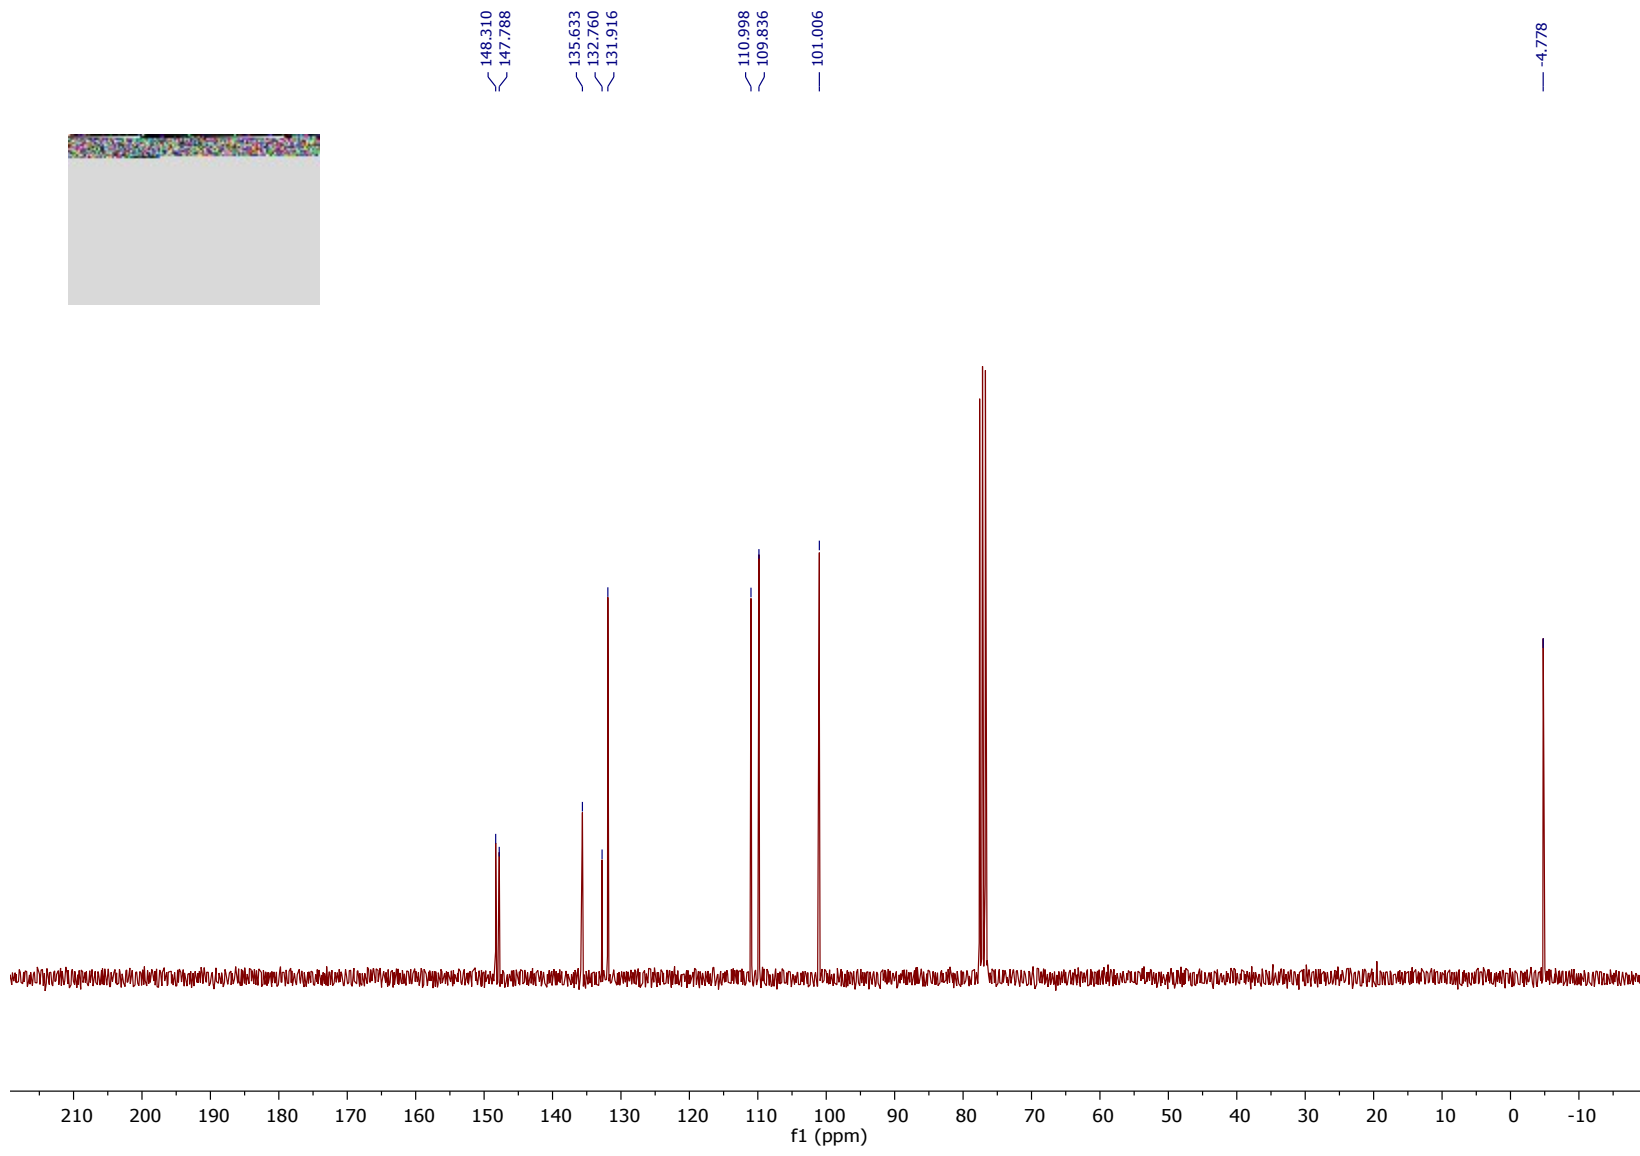

S-79

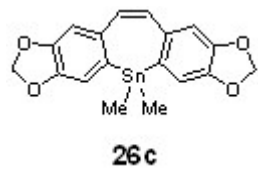

6.894  
6.888  
6.872  
6.851  
6.843  
6.822  
6.799  
6.719  
6.711  
6.704  
5.898

0.550  
0.546  
0.454  
0.363  
0.359

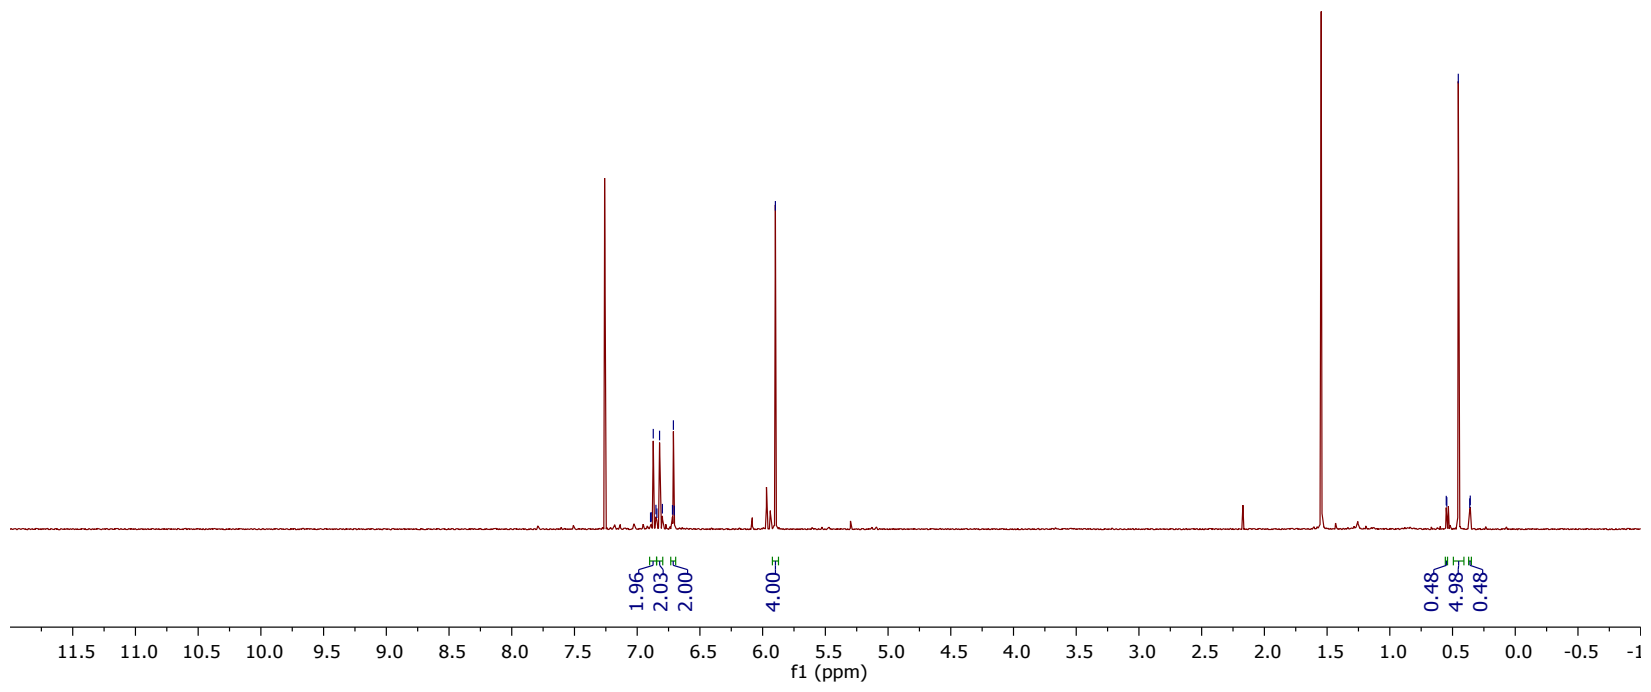



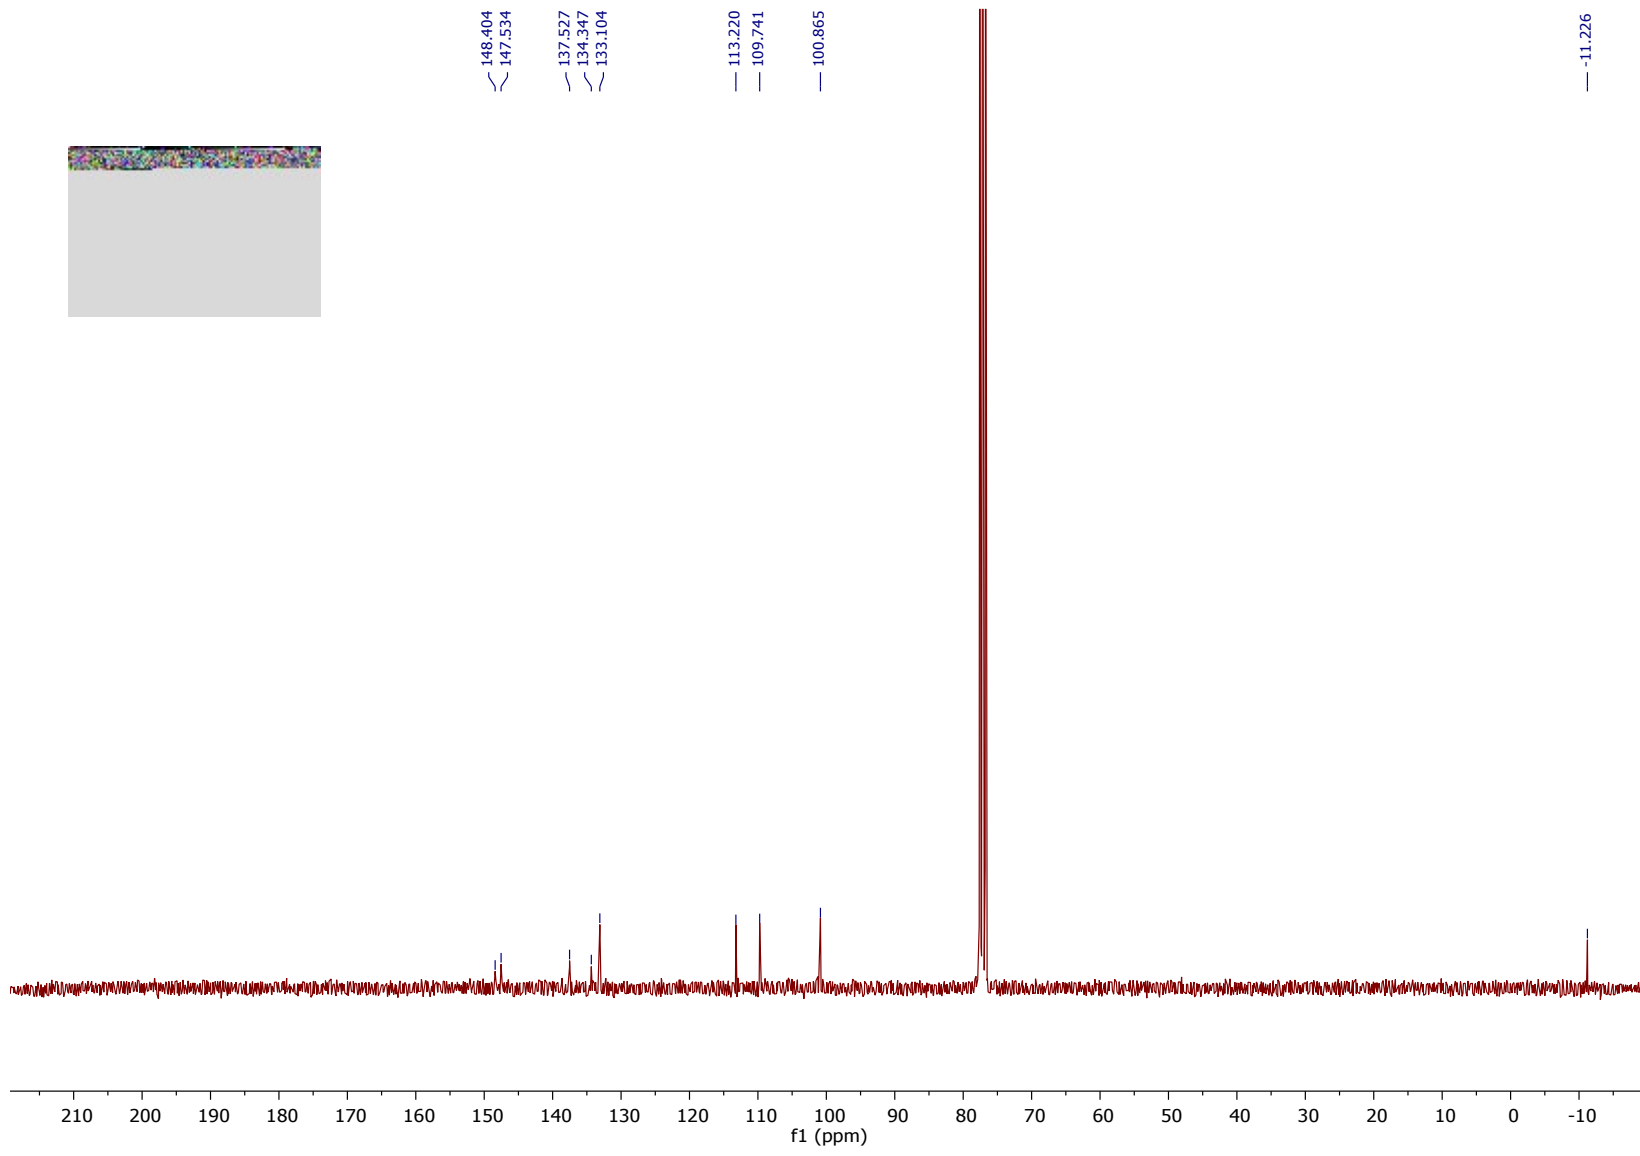

S-81

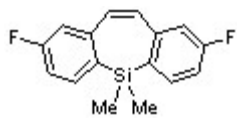

27a

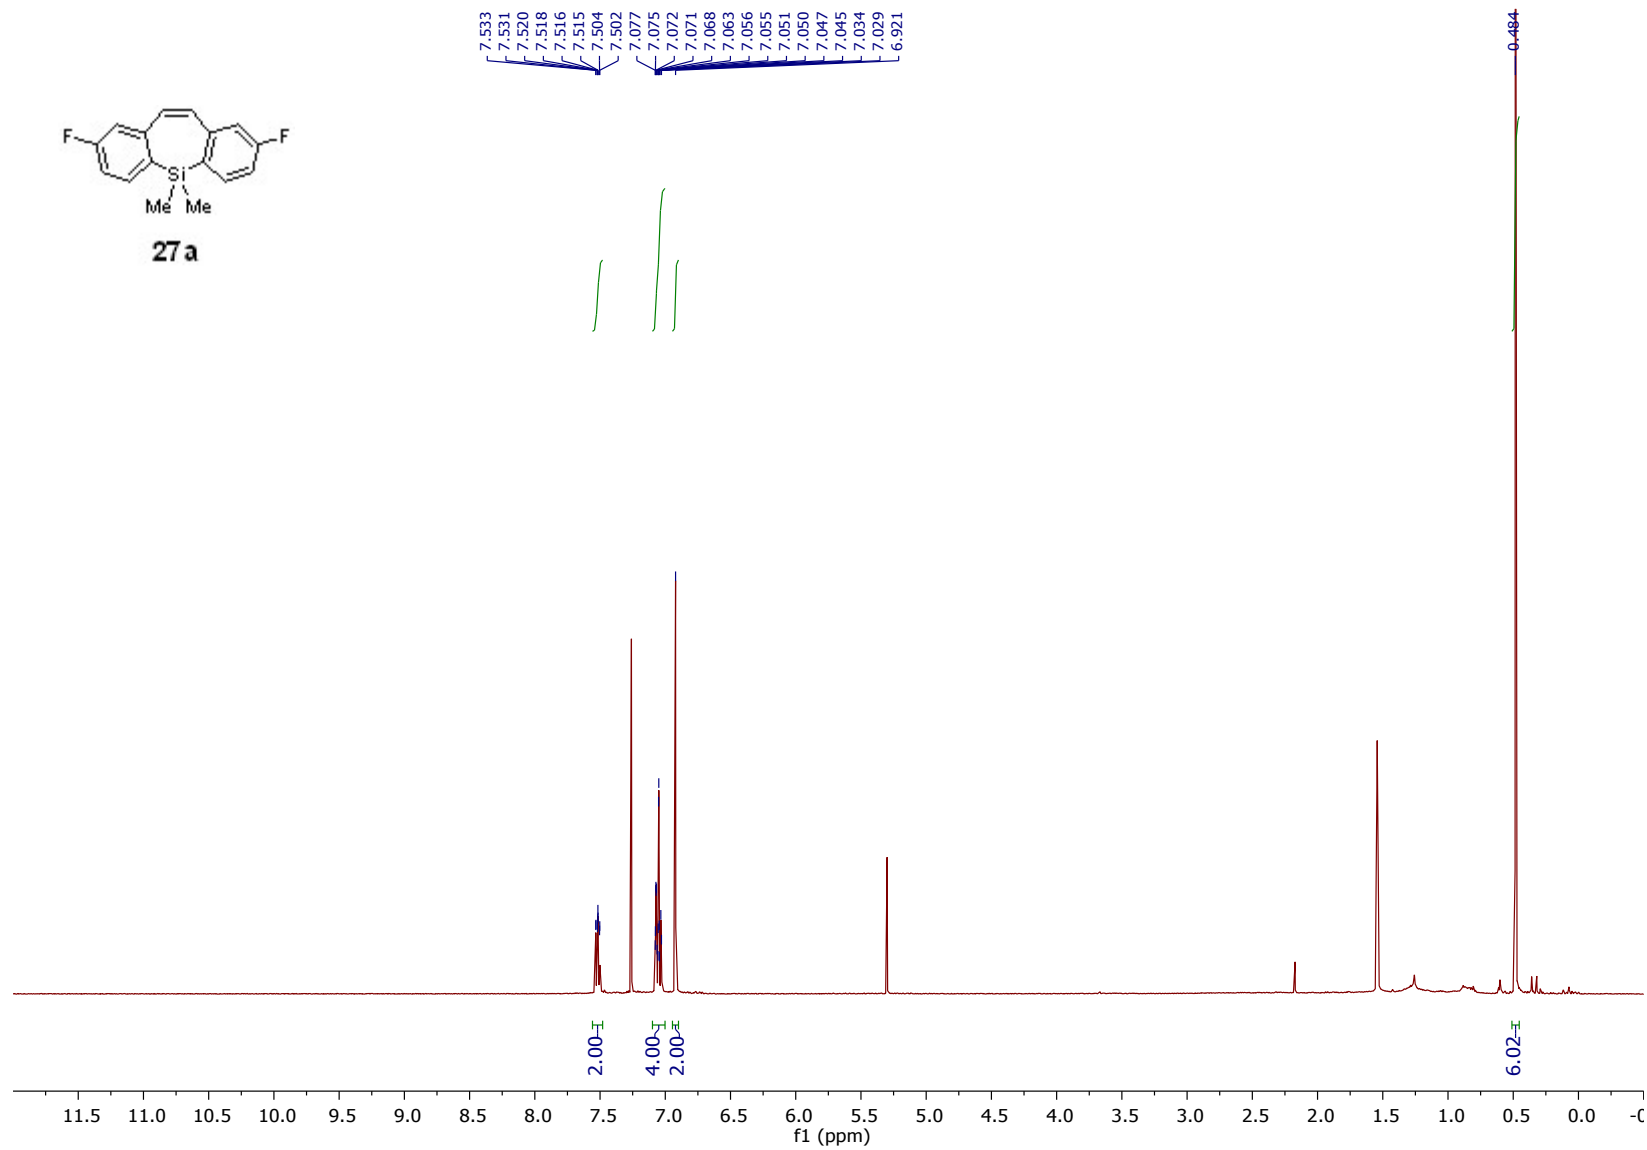

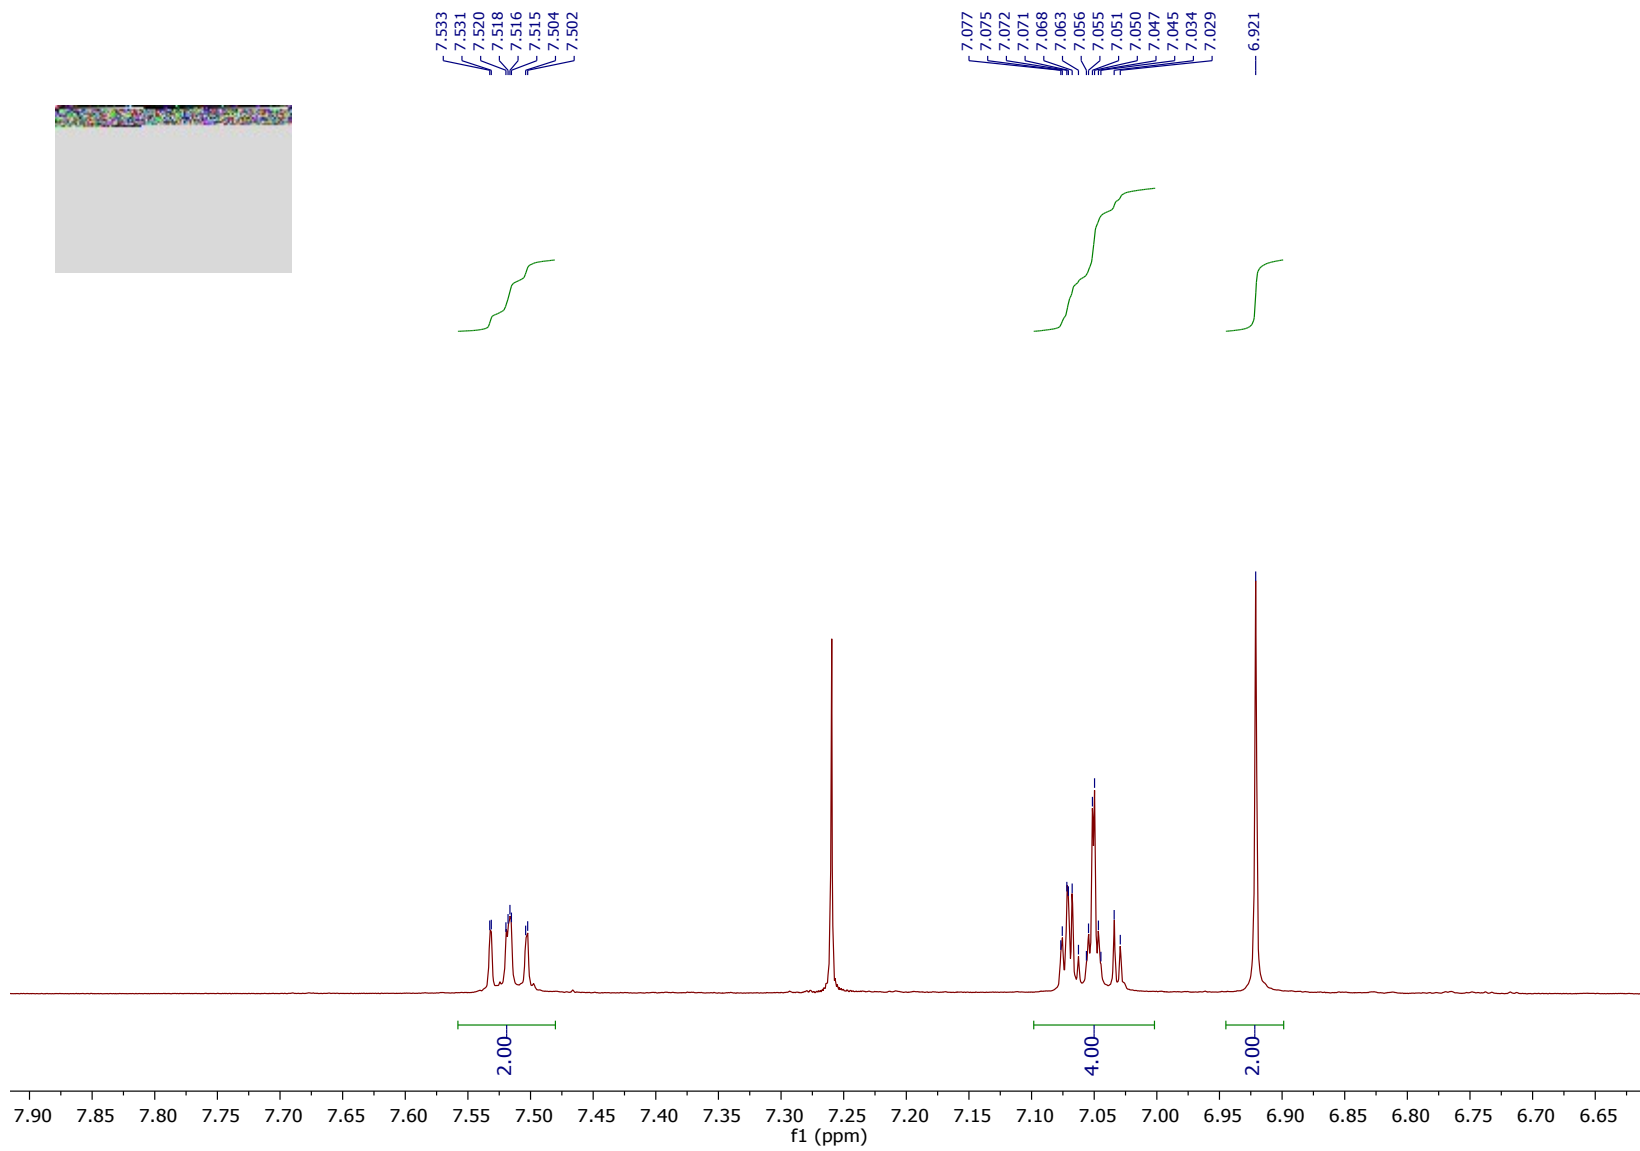

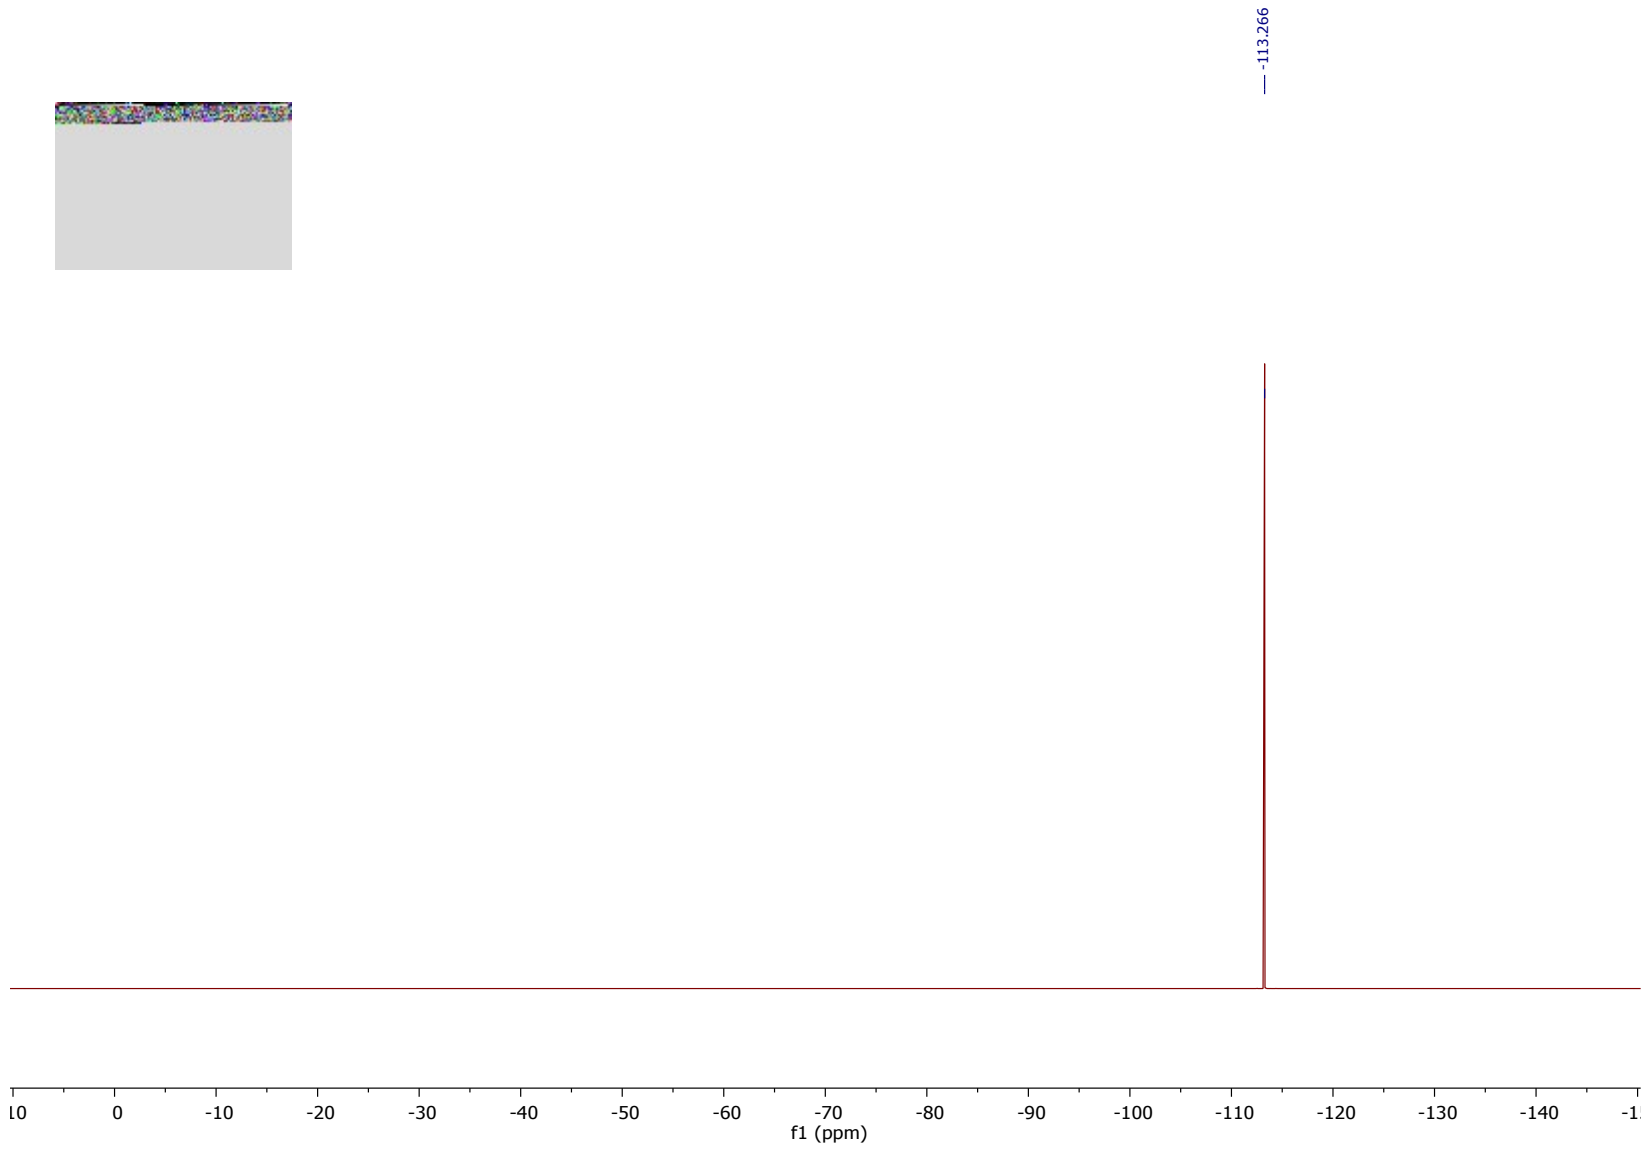

S-84

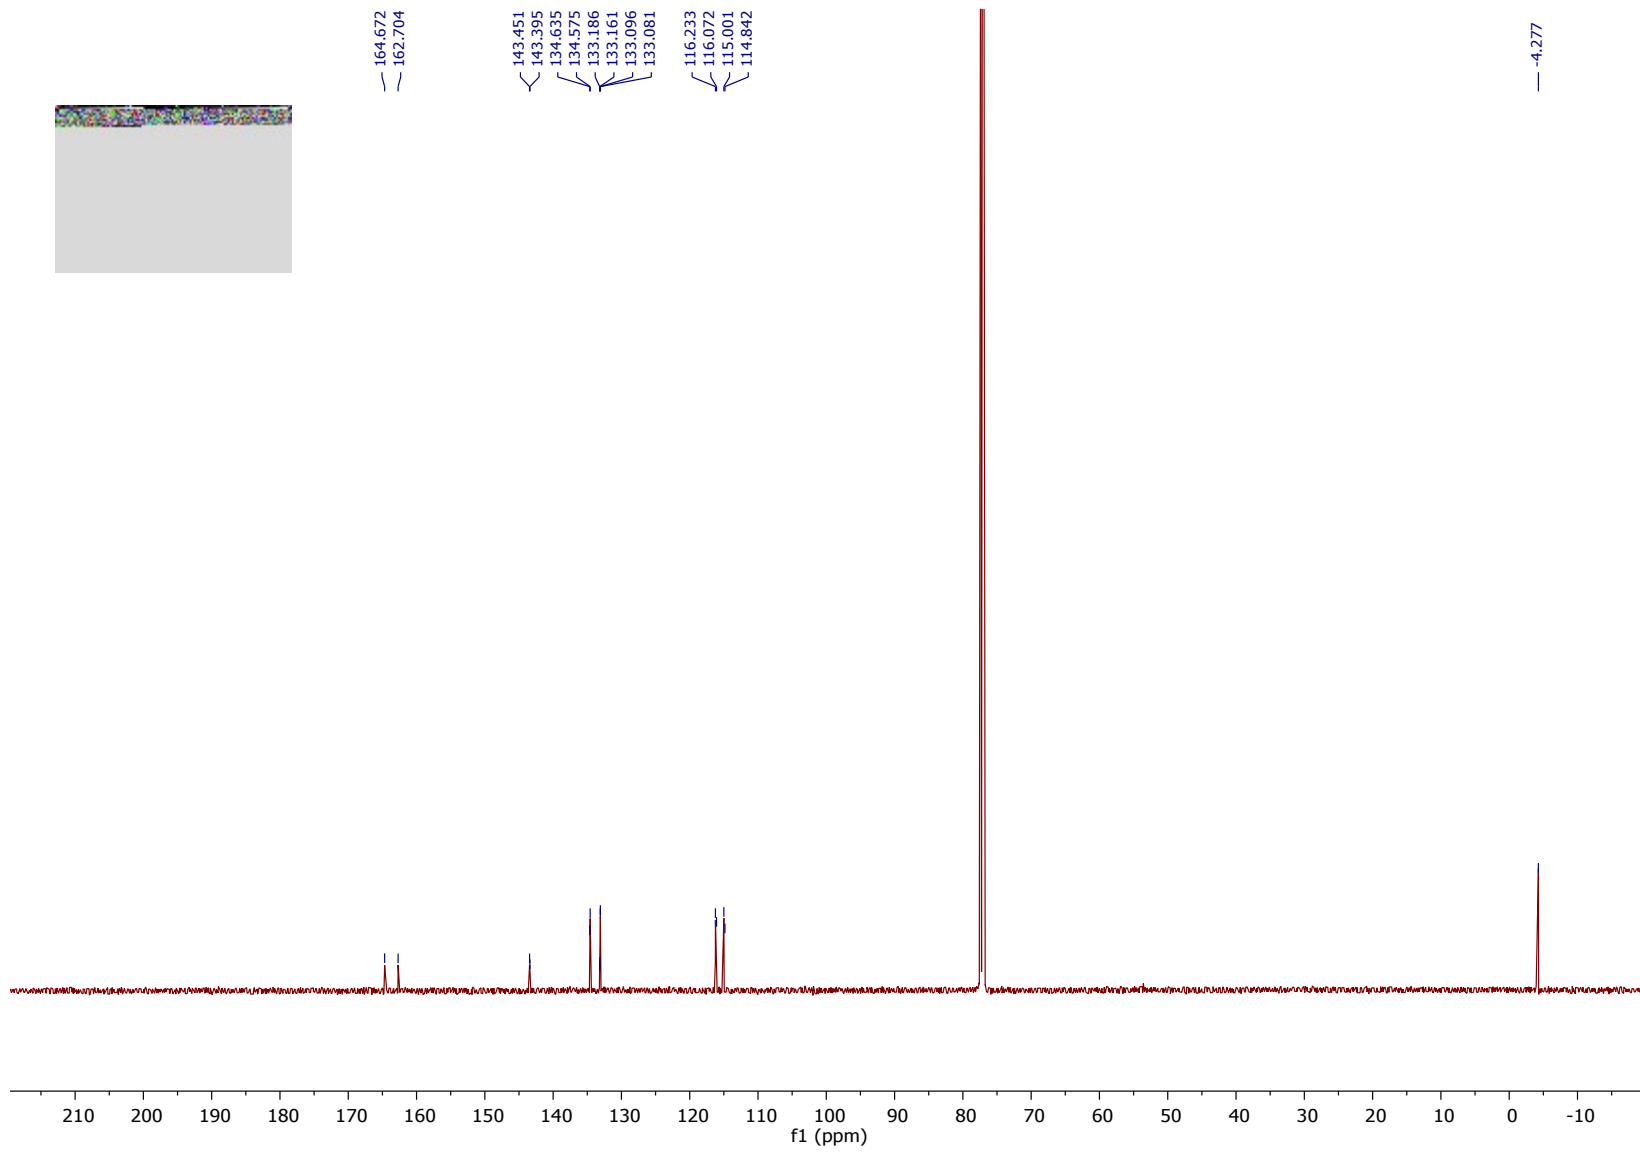

S-85

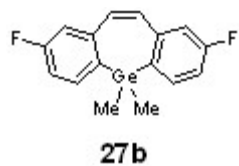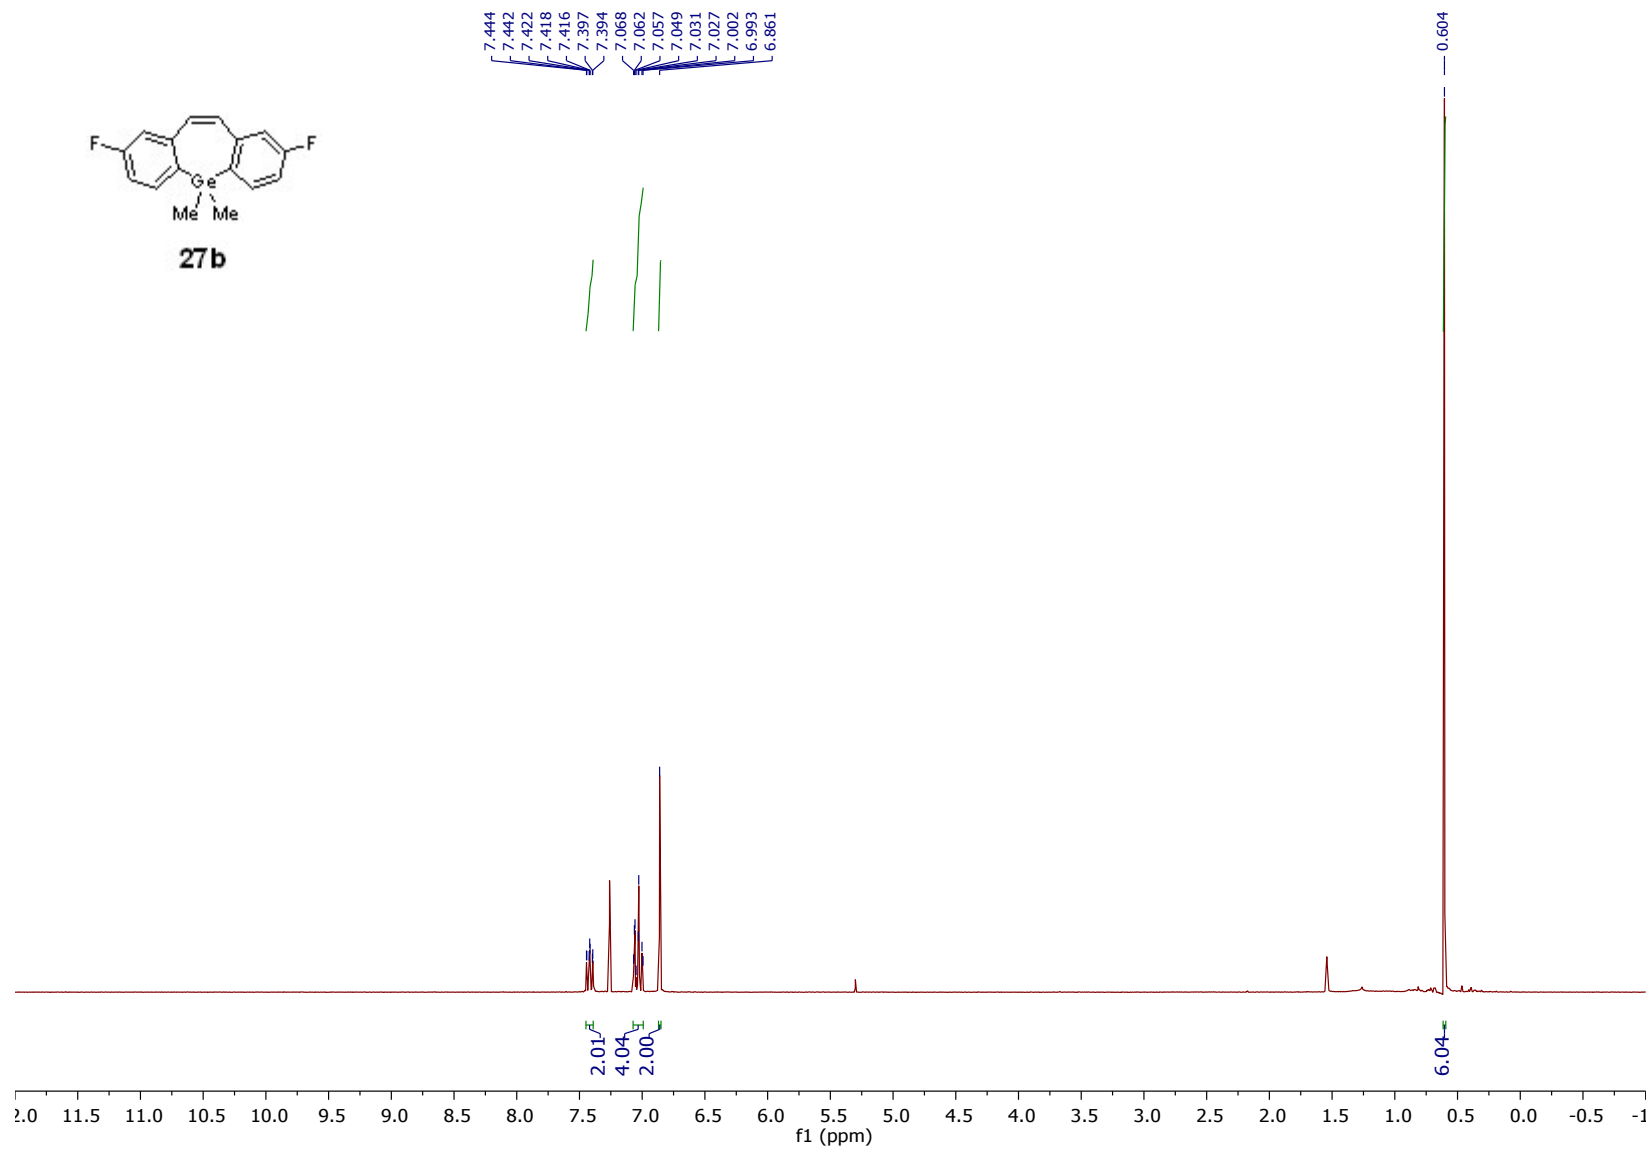

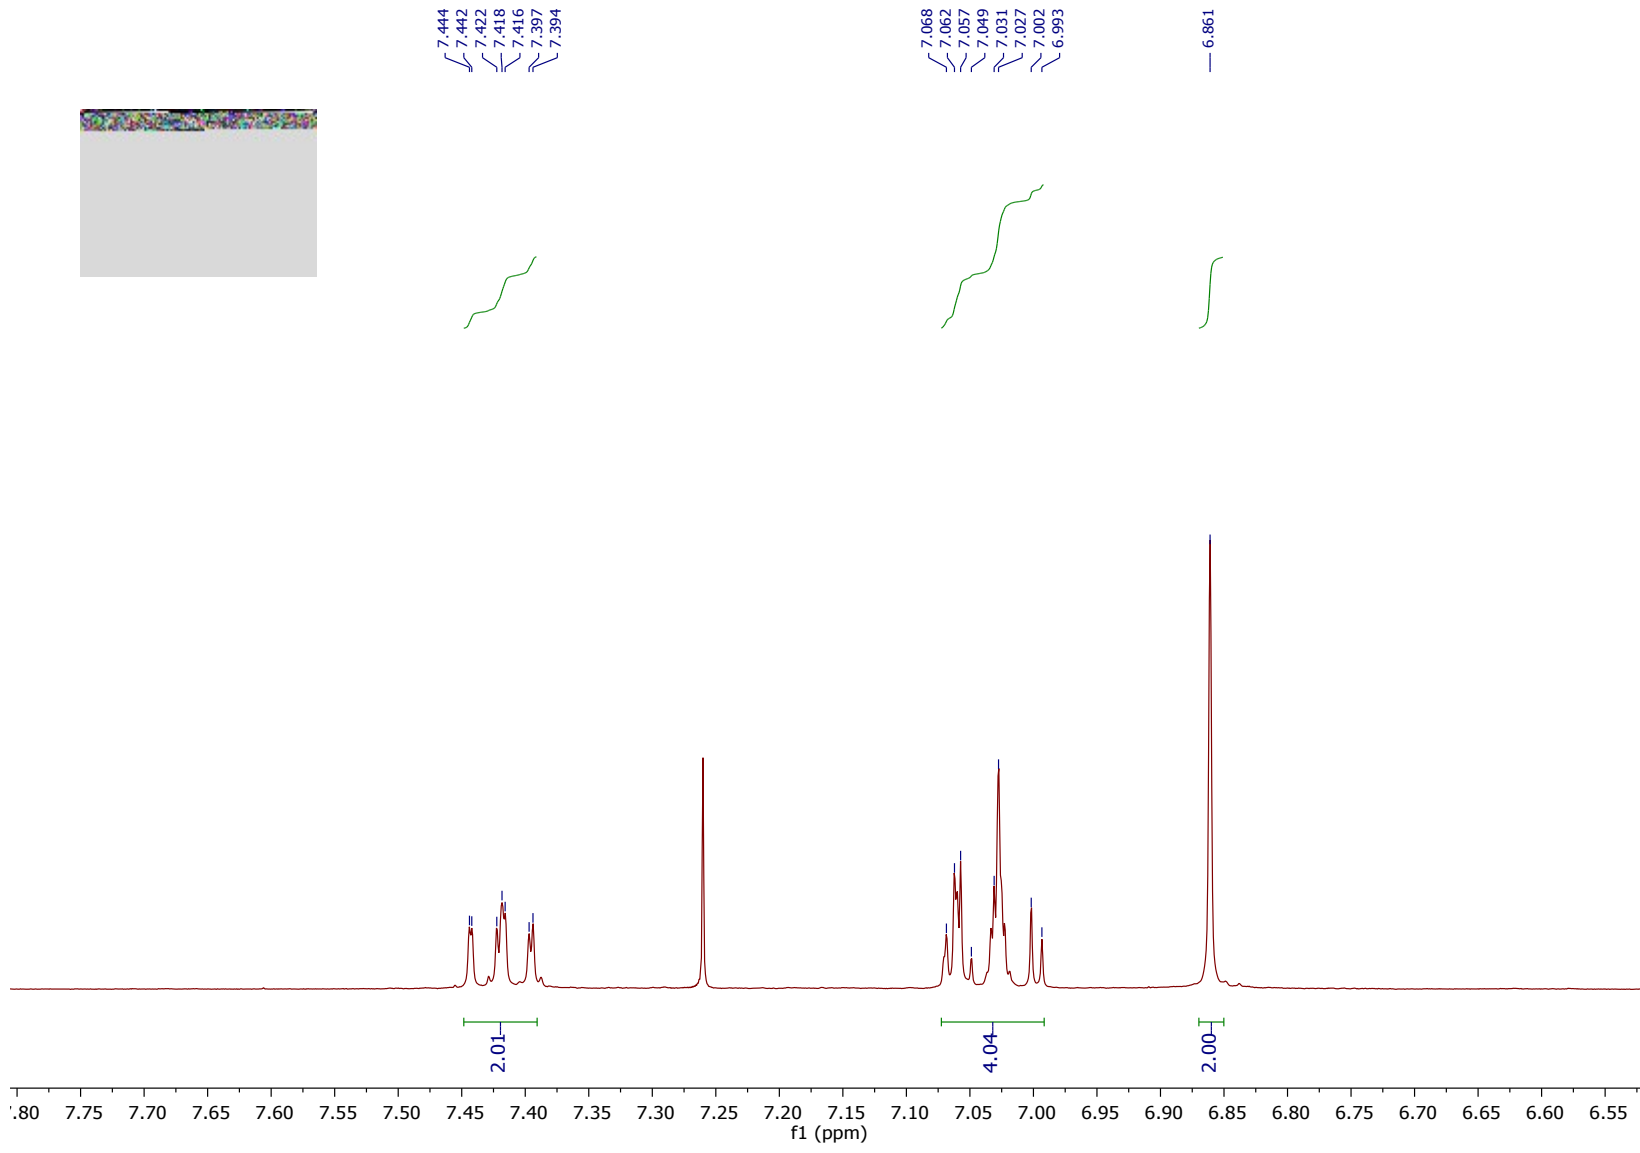

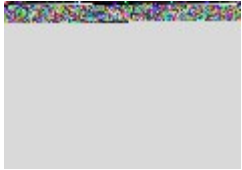

— -114.209

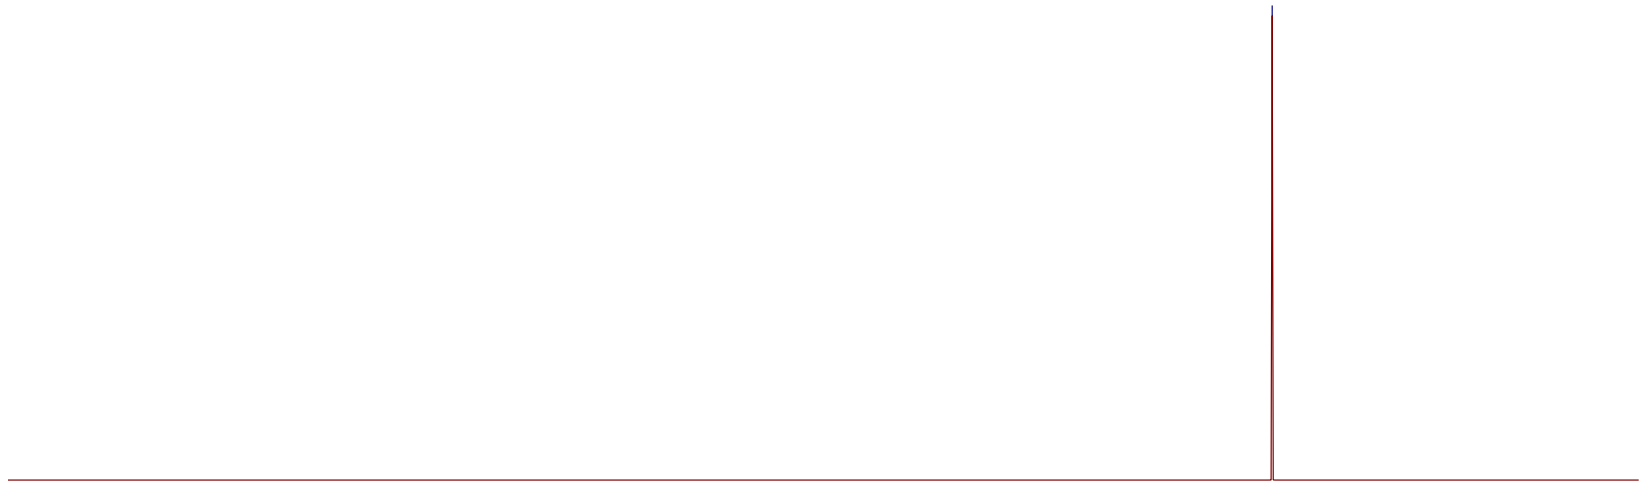

10 0 -10 -20 -30 -40 -50 -60 -70 -80 -90 -100 -110 -120 -130 -140 -150  
f1 (ppm)

S-88



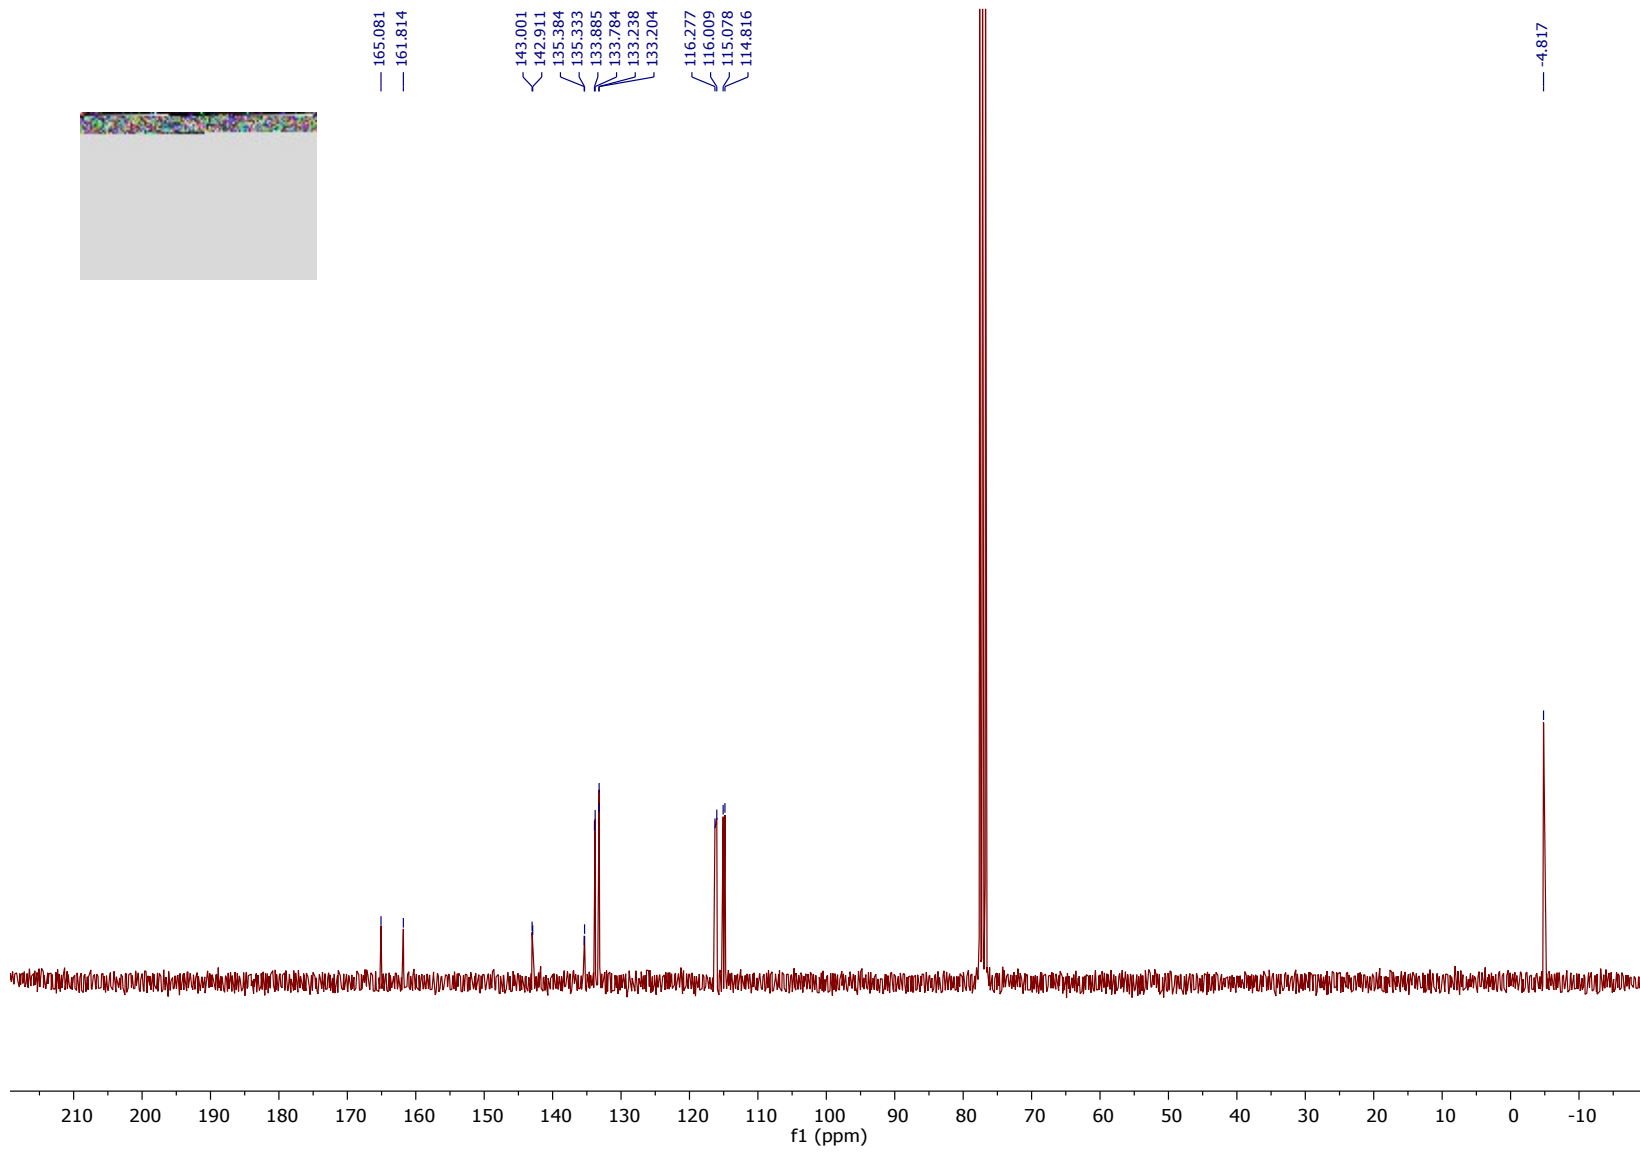

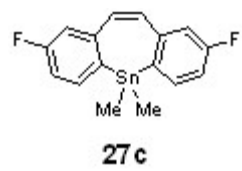

7.423  
7.401  
7.396  
7.373  
7.056  
7.047  
7.020  
7.012  
6.993  
6.990  
6.985  
6.982  
6.964  
6.955  
6.855

0.600  
0.596  
0.504  
0.411  
0.407

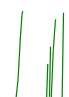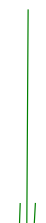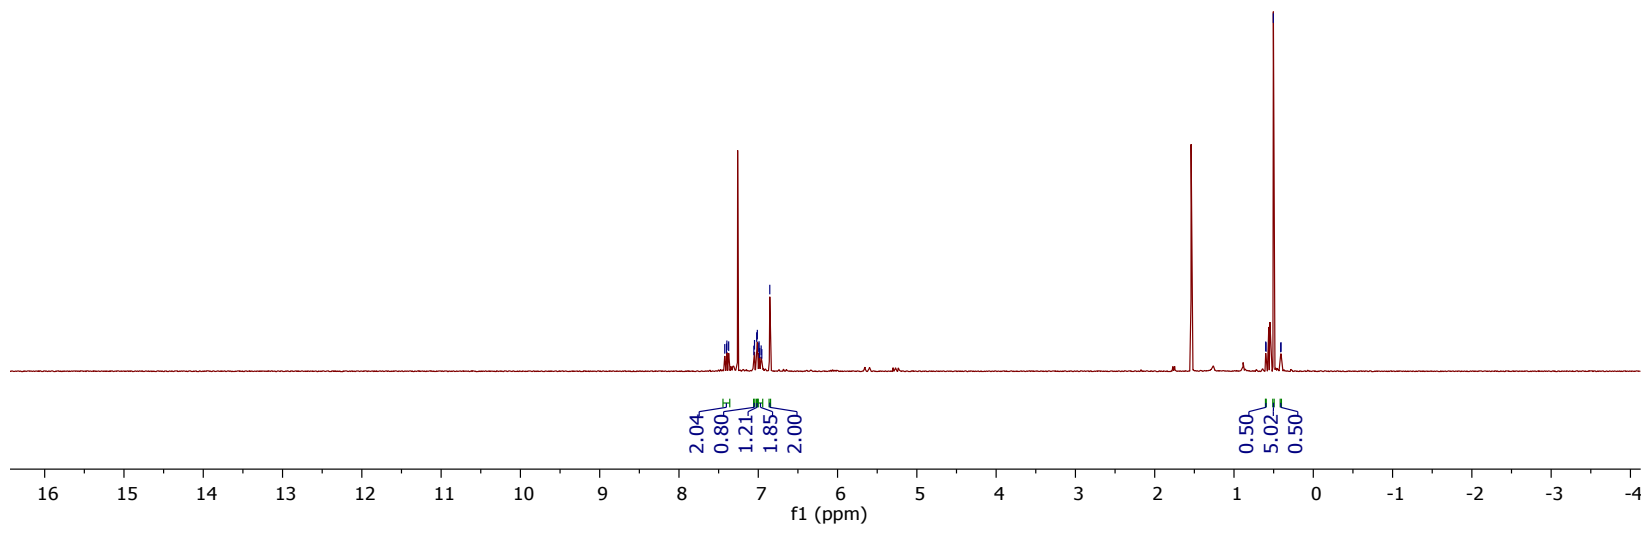

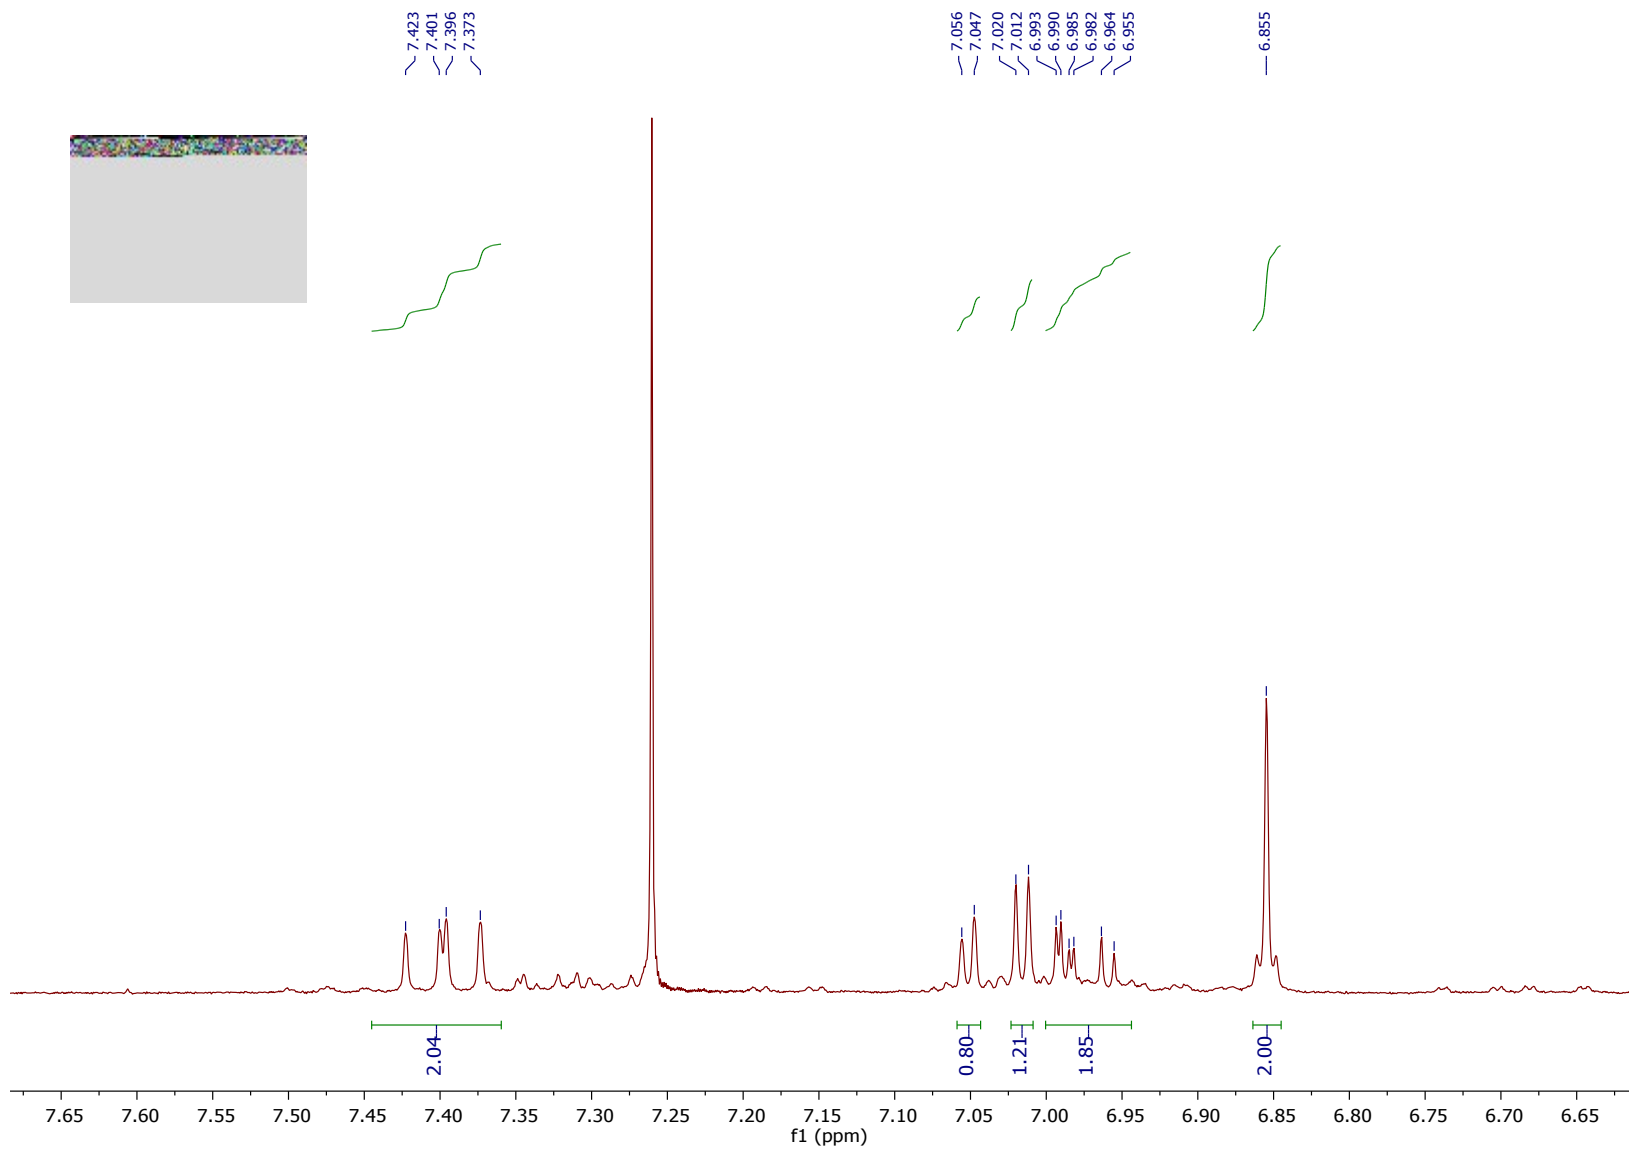

S-91

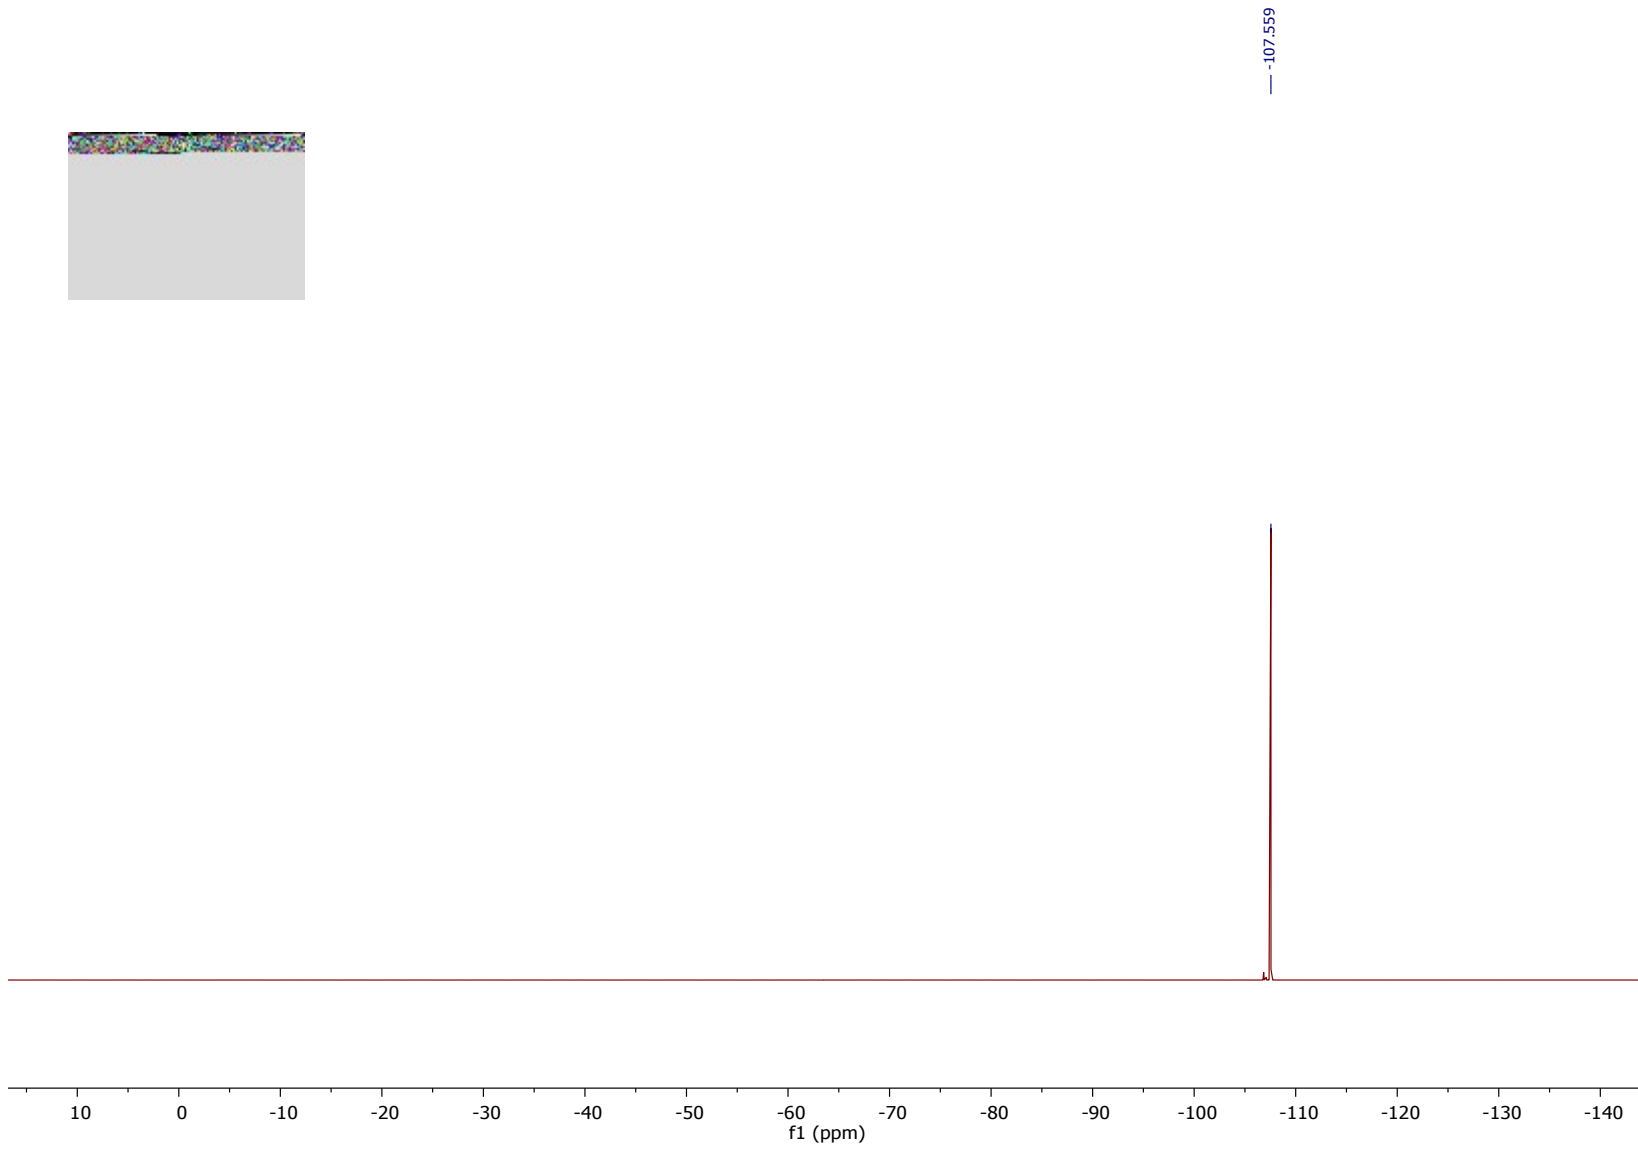

S-92

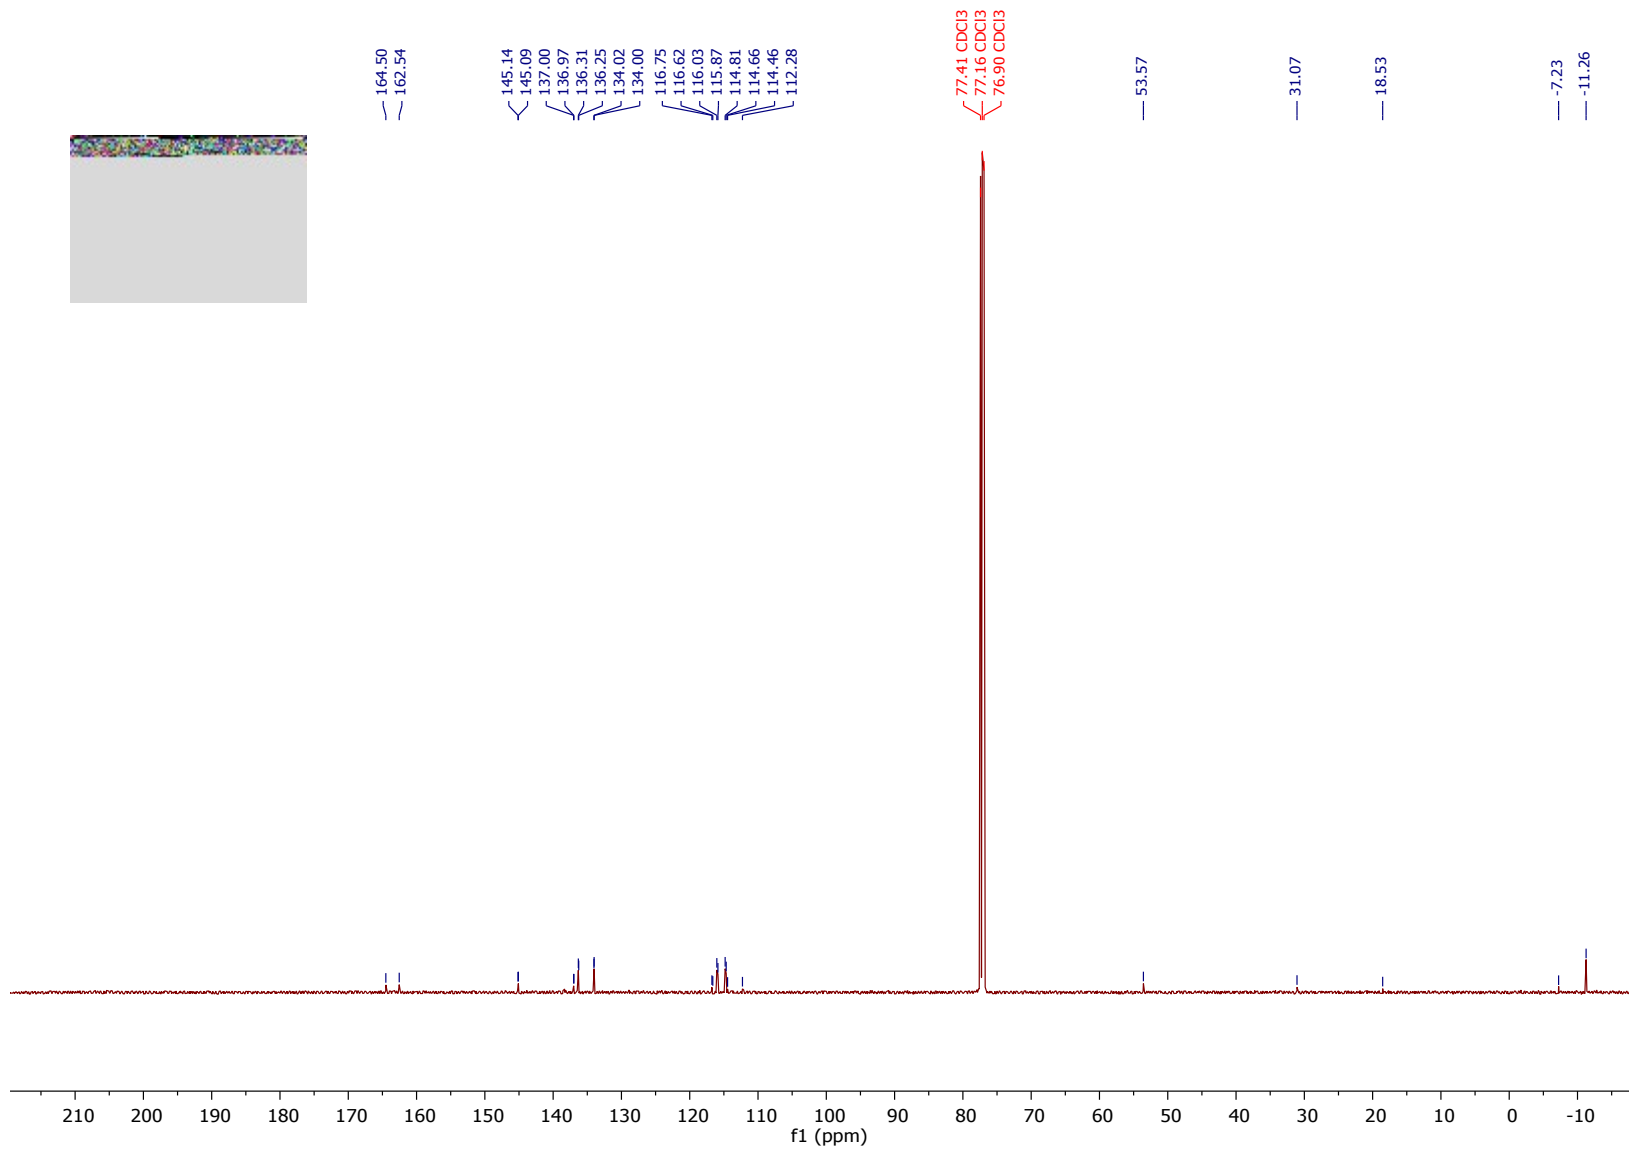

S-93
